# Supplementary material for: Genome Wide Pleiotropic Analysis to Identify Novel Variants and Improve Genetic Risk Score Construction
Source: Research Square preprint supplement (doi:10.21203/rs.3.rs-133000/v2), 2021-03-10
Supplement: Supplementary file 2 [file 7f31aefa1af38b2045b4042b.xlsx]

## Sheet: S Table 1
Supplementary Table 1. Causal effect estimates between SBP and DBP by IMRP and MRmix using the UK Biobank-ICBP GWAS data
			IMRP		MRmix
Outcome	Exposure	# of IVs	Causal effect (se)	# of PVsd	Causal effect (se)
DBP (standardized)	SBP(standardized)	1125	0.864 (0.005)	485	0.89 (0.012)
SBP(standardized)	DBP(standardized)	1183	0.862 (0.005)	513	0.90 (0.010)
DBP (original)	SBP(original)	1125	0.503(0.003)	486	-
SBP(original)	DBP(original)	1183	1.483(0.009)	513	-
The causal effect test p values are all < 1.0×10-300

## Sheet: S Table 2
SNP	CHR	BP	A1	A2	FREQ	Effect_SBP	StdErr_SBP	P_SBP	N_SBP	Effect_DBP	StdErr_DBP	P_DBP	N_DBP	Effect_PP	StdErr_PP	P_PP	N_PP	Pleiotropy test 1 P-value	Pleiotropy test 2 P value	MVP_pleiotropy_P	Is locus known?	ANNOTated genes
Novel loci defined as a variant outside of 1Mb region of known BP variants with LD R2<0.05.
rs272564	1	45012273	a	c	0.717	0.0064	0.0337	0.8489	717068	-0.0784	0.0193	4.956e-05	736089	0.0707	0.0229	0.002035	717065	3.04807e-09	2.68543e-07	0.860766	new(>1Mb)	RNF220(0)
rs1938450	1	68359482	a	g	0.3257	-0.0266	0.0321	0.407	734642	-0.0903	0.0184	9.087e-07	754022	0.0553	0.0218	0.01098	734637	4.57163e-09	2.32331e-06	0.734824	new(>1Mb)	GNG12-AS1(0)
rs11162906	1	80500074	a	c	0.6534	0.0679	0.0316	0.03191	731465	-0.0432	0.0182	0.01749	750863	0.1027	0.0215	1.781e-06	731461	2.40945e-09	3.72776e-09	0.00143186	new(>1Mb)	.
rs390923	1	110499669	a	g	0.5883	-0.0749	0.0305	0.01417	732765	0.031	0.0175	0.07728	752164	-0.0938	0.0207	6.015e-06	732761	3.71078e-08	2.14156e-08	0.74582	new(>1Mb)	.
rs6692560	1	163124381	a	c	0.1074	-0.023	0.0491	0.6402	725083	0.1002	0.0281	0.0003639	744053	-0.1165	0.0333	0.0004662	725115	2.46903e-08	7.79679e-07	0.113219	new(>1Mb)	RGS5(0)
rs17713879	2	254215	a	g	0.3647	0.0608	0.0313	0.05191	731461	-0.0397	0.0179	0.02657	750866	0.0903	0.0212	2.052e-05	731470	3.74773e-08	6.41914e-08	0.000797264	new(>1Mb)	SH3YL1(0)
rs3136302	2	48021379	c	g	0.5491	-0.0252	0.0304	0.4083	725373	0.0702	0.0175	5.841e-05	744485	-0.0914	0.0206	9.617e-06	725360	2.9556e-11	1.92145e-09	0.0600904	new(>1Mb)	MSH6(0)
rs6735304	2	101617631	t	c	0.3665	-0.0634	0.0312	0.04183	734699	0.0404	0.0179	0.02382	754116	-0.1019	0.0211	1.43e-06	734700	1.47479e-08	2.33796e-08	0.000930753	new(>1Mb)	.
rs12470661	2	232060050	a	g	0.7522	-0.0684	0.035	0.05087	730972	0.0596	0.0201	0.003065	750363	-0.1182	0.0238	6.683e-07	730980	5.32636e-11	2.48333e-10	0.00124798	new(>1Mb)	.
rs74621754	3	8496371	a	g	0.0471	-0.0869	0.0763	0.2547	646742	0.1598	0.0436	0.0002428	663463	-0.2536	0.0517	9.34e-07	646778	6.15377e-11	1.94385e-09	0.0783391	new(>1Mb)	LMCD1-AS1(0)
rs10008976	4	23954387	t	c	0.2965	0.0728	0.033	0.02751	729718	-0.0386	0.019	0.04172	749031	0.1056	0.0224	2.462e-06	729689	2.72989e-08	2.63475e-08	0.0825471	new(>1Mb)	.
rs315390	4	73744442	t	c	0.2123	-0.0957	0.0368	0.009271	735753	0.0355	0.0211	0.09273	755183	-0.1177	0.025	2.404e-06	735777	2.72198e-08	1.21706e-08	0.376707	new(>1Mb)	.
rs3775221	4	88011793	t	g	0.6199	0.0034	0.0311	0.9134	730608	-0.0767	0.0178	1.721e-05	750022	0.0755	0.0211	0.0003424	730614	6.62454e-10	1.01565e-07	0.260627	new(>1Mb)	AFF1(0)
rs385886	6	24923935	a	g	0.7108	-0.0128	0.034	0.7069	704139	-0.0841	0.0194	1.515e-05	723048	0.0684	0.0231	0.002992	704115	2.06443e-08	3.22775e-06	0.184152	new(>1Mb)	FAM65B(0)
rs10947978	6	41471608	a	c	0.3946	0.0129	0.0336	0.7009	629447	-0.0845	0.0191	9.887e-06	647386	0.0988	0.0228	1.443e-05	629454	2.64958e-11	5.80212e-09	0.0181206	new(>1Mb)	LINC01276(0)
rs56098119	6	90296727	a	g	0.1321	-0.0789	0.0445	0.07627	734417	0.0629	0.0255	0.01376	753822	-0.1359	0.0302	6.805e-06	734396	1.69134e-08	4.53009e-08	0.0317796	new(>1Mb)	ANKRD6(0)
rs150953973	6	120780033	a	g	0.0131	-0.1494	0.1435	0.2979	644527	0.2695	0.0817	0.0009697	661827	-0.4478	0.0971	4.006e-06	645412	3.53764e-09	6.12337e-08	0.020676	new(>1Mb)	.
rs180271	7	93539479	a	g	0.649	0.0164	0.0322	0.6105	710338	-0.0692	0.0184	0.0001715	729670	0.0921	0.0219	2.626e-05	710336	3.68722e-09	1.72428e-07	0.0056357	new(>1Mb)	GNGT1(0)
rs17639782	7	104614664	a	g	0.8742	0.141	0.0457	0.002043	726003	-0.0358	0.0262	0.1723	745118	0.1595	0.031	2.727e-07	726012	1.11985e-08	1.94025e-09	0.191466	new(>1Mb)	.
rs1906214	8	122380475	a	g	0.1683	-0.0858	0.0406	0.0345	725245	0.0684	0.0233	0.003312	744641	-0.1471	0.0276	9.302e-08	725240	1.86935e-11	7.23566e-11	0.108818	new(>1Mb)	HAS2
rs11989271	8	122632611	a	g	0.9309	0.0865	0.0602	0.1509	717086	-0.1151	0.0345	0.0008472	736496	0.202	0.0409	7.802e-07	717058	1.14423e-10	1.56335e-09	0.00738246	new(>1Mb)	HAS2(0)
rs10868842	9	73119085	a	g	0.3609	0.0442	0.0312	0.157	739243	-0.0644	0.018	0.0003581	751017	0.0941	0.0213	9.707e-06	739249	1.37132e-11	2.64832e-10	0.0216325	new(>1Mb)	.
rs12768143	10	22808844	a	t	0.7119	0.0696	0.0337	0.03916	715049	-0.0542	0.0193	0.005033	734257	0.1228	0.0229	8.606e-08	715049	9.17998e-11	3.15891e-10	0.0160749	new(>1Mb)	missense
rs10764337	10	22861490	a	c	0.0548	-0.0683	0.0669	0.3073	730578	-0.1993	0.0389	2.94e-07	730570	0.1349	0.0454	0.002985	730600	2.39936e-09	1.72865e-06	NA	new(>1Mb)	PIP4K2A(0)
rs10500747	11	11771889	t	c	0.7464	0.0966	0.0347	0.005337	727821	-0.0265	0.0199	0.1832	747196	0.1195	0.0236	4.005e-07	727846	1.213e-07	3.11213e-08	0.423487	new(>1Mb)	.
rs11226029	11	103693627	a	g	0.7131	-0.0783	0.0333	0.01864	733967	0.0383	0.0191	0.04465	753337	-0.1146	0.0226	4.083e-07	733957	1.16907e-08	9.85023e-09	0.106973	new(>1Mb)	.
rs11221502	11	128767035	t	c	0.1885	-0.0011	0.0395	0.9778	703972	0.0907	0.0226	5.85e-05	723279	-0.0927	0.0268	0.0005451	703981	1.51922e-08	1.21579e-06	0.39406	new(>1Mb)	KCNJ5(0)
rs1343676	12	33537387	t	c	0.4903	-0.0109	0.0301	0.7186	733187	0.0904	0.0174	2.033e-07	744950	-0.101	0.0205	8.648e-07	733192	9.55566e-15	1.12282e-11	0.0125867	new(>1Mb)	SYT10(0)
rs7322054	13	38246708	a	c	0.5675	-0.0128	0.0302	0.6709	741285	-0.0907	0.0174	1.988e-07	753025	0.0692	0.0206	0.0007762	741269	1.04453e-11	1.2986e-08	0.00809871	new(>1Mb)	TRPC4(0)
rs4337169	13	94416001	a	g	0.5739	0.1215	0.0303	6.176e-05	741081	-0.0034	0.0175	0.8477	752789	0.1124	0.0207	5.41e-08	741085	2.23589e-07	3.79643e-09	0.073684	new(>1Mb)	GPC6(0)
rs61972411	13	100602630	a	g	0.5515	-0.1131	0.0311	0.0002816	697621	0.0079	0.0179	0.6586	709053	-0.1106	0.0212	1.869e-07	697702	3.77191e-07	1.44911e-08	0.0229382	new(>1Mb)	LOC101927437(0)
rs112500920	15	82507605	t	c	0.9317	-0.032	0.063	0.6114	670193	0.1442	0.0361	6.592e-05	681501	-0.1762	0.0429	4.025e-05	670257	4.77652e-10	3.49875e-08	0.791303	new(>1Mb)	EFTUD1(0)
rs62621400	15	101718239	c	g	0.9417	-0.0811	0.0668	0.2248	693068	0.1208	0.0385	0.001703	703639	-0.1945	0.0455	1.942e-05	693171	3.75708e-09	3.82262e-08	0.00212296	new(>1Mb)	CHSY1(0)
rs116643984	15	101791212	a	c	0.1629	-0.0575	0.0413	0.1636	716923	0.0944	0.0239	7.726e-05	728325	-0.1535	0.0282	5.14e-08	716883	4.04164e-13	1.5625e-11	0.010449	new(>1Mb)	CHSY1(0)
rs1804193	17	15134006	t	c	0.078	0.0189	0.0586	0.7475	687935	0.1453	0.0338	1.665e-05	698278	-0.1443	0.0398	0.0002907	688028	1.6683e-08	2.2109e-06	0.307286	new(>1Mb)	PMP22(0)
rs73937040	18	3258733	a	g	0.1306	0.0814	0.0451	0.0708	731155	-0.0602	0.026	0.02065	742842	0.1376	0.0308	7.773e-06	731175	4.66756e-08	9.20783e-08	2.01102e-06	new(>1Mb)	.
rs146827176	20	35169916	t	c	0.0493	-0.0332	0.0728	0.648	694798	-0.1951	0.0418	3.099e-06	706113	0.1629	0.0496	0.001014	694914	2.1285e-09	6.73435e-07	0.00976338	new(>1Mb)	LOC101926987(0)|MYL9(0)
rs113541629	22	25464192	t	c	0.0172	0.3086	0.1306	0.01809	657617	-0.1334	0.0754	0.07684	667787	0.3582	0.0889	5.572e-05	657684	7.53434e-08	4.45433e-08	0.328491	new(>1Mb)	KIAA1671(0)
Novel signals defined as a variant within 1Mb region of known BP variants with LD R2<0.05.
rs12128814	1	26826111	a	g	0.2791	0.0295	0.0338	0.3814	723488	0.099	0.0193	2.863e-07	742837	-0.0709	0.0229	0.001956	723502	1.00711e-09	9.227e-07	0.00584126	new(<1Mb&r2<0.1)	.
rs11264074	1	38052061	a	g	0.1417	-0.0631	0.0434	0.1461	731107	0.0659	0.025	0.00827	750282	-0.1201	0.0295	4.619e-05	731102	4.1552e-08	1.68154e-07	0.0268941	new(<1Mb&r2<0.1)	GNL2(0)
rs12760654	1	47669325	a	g	0.2079	0.0396	0.0372	0.2871	728659	-0.0665	0.0213	0.001796	748085	0.0954	0.0252	0.0001553	728647	1.28643e-08	1.50311e-07	0.0368787	new(<1Mb&r2<0.1)	.
rs78859255	1	59804958	a	g	0.0255	-0.1436	0.1002	0.1517	677057	0.1967	0.0571	0.0005739	695037	-0.3325	0.068	1.025e-06	677050	4.28686e-11	7.89599e-10	0.148031	new(<1Mb&r2<0.1)	FGGY(0)
rs72720129	1	86900869	t	g	0.6578	0.0017	0.0318	0.9585	730375	0.0867	0.0182	1.948e-06	749778	-0.0789	0.0216	0.000255	730400	3.80158e-11	1.71428e-08	0.00143327	new(<1Mb&r2<0.1)	CLCA2(0)
rs6677074	1	116278503	a	c	0.4511	0.0618	0.0303	0.04179	728776	-0.0503	0.0174	0.003813	748113	0.108	0.0206	1.527e-07	728758	5.30891e-11	2.03035e-10	6.57242e-05	new(<1Mb&r2<0.1)	CASQ2(0)
rs17013645	1	119484849	a	g	0.3319	-0.0275	0.0319	0.3885	733503	0.0701	0.0183	0.0001259	752915	-0.0914	0.0217	2.425e-05	733499	1.24964e-10	5.81477e-09	1.03655e-05	new(<1Mb&r2<0.1)	TBX15(0)
rs11264304	1	155033317	t	c	0.3029	0.002	0.0332	0.9527	719138	0.0925	0.019	1.105e-06	738374	-0.0791	0.0225	0.0004458	719122	1.47981e-11	8.70861e-09	0.714681	new(<1Mb&r2<0.1)	ADAM15(0)|LOC100505666(0)
rs72707229	1	178868454	a	c	0.0905	-0.0961	0.0543	0.07647	696332	0.1108	0.0309	0.0003392	713923	-0.1847	0.0368	5.018e-07	696268	5.71409e-13	1.13955e-11	0.00657981	new(<1Mb&r2<0.1)	RALGPS2(0)
rs76926608	1	219704939	a	g	0.0302	0.0679	0.0966	0.4821	624782	-0.1982	0.0548	0.0002979	642092	0.2449	0.0656	0.0001869	624835	3.05645e-09	1.12763e-07	0.000867327	new(<1Mb&r2<0.1)	.
rs837748	1	226737845	a	g	0.1261	-0.0606	0.0455	0.183	727443	0.0811	0.0261	0.00192	746762	-0.1363	0.0309	1.037e-05	727447	2.01832e-09	1.94473e-08	0.199979	new(<1Mb&r2<0.1)	C1orf95(0)
rs7577016	2	18709543	a	t	0.4185	0.0047	0.0306	0.8788	726184	0.0775	0.0175	1.007e-05	745590	-0.0669	0.0208	0.001289	726180	1.77664e-09	3.53649e-07	0.0256564	new(<1Mb&r2<0.1)	.
rs4666474	2	19493526	t	c	0.816	-0.0211	0.0388	0.5862	734841	-0.121	0.0222	5.283e-08	754269	0.0899	0.0263	0.0006293	734810	3.18713e-12	8.07749e-09	0.0176588	new(<1Mb&r2<0.1)	.
rs67550338	2	19693389	t	c	0.1243	0.0047	0.0492	0.9243	631649	-0.1165	0.028	3.232e-05	649736	0.1001	0.0334	0.002729	631515	2.83056e-09	3.31288e-07	0.620286	new(<1Mb&r2<0.1)	.
rs62111828	2	19847432	a	g	0.9814	0.2101	0.1138	0.065	721018	-0.1671	0.0651	0.0103	740194	0.3626	0.077	2.514e-06	721131	4.29248e-09	1.27495e-08	0.0197601	new(<1Mb&r2<0.1)	.
rs16987149	2	20040533	a	g	0.0335	0.1031	0.084	0.2198	732536	-0.1654	0.0482	0.0006013	751958	0.2517	0.057	1.007e-05	732573	2.57034e-10	4.64121e-09	0.124186	new(<1Mb&r2<0.1)	.
rs861051	2	36705579	a	g	0.7058	-0.0484	0.0334	0.147	711504	0.0699	0.0192	0.0002653	730728	-0.1107	0.0227	1.043e-06	711502	5.63113e-12	1.28288e-10	4.34334e-07	new(<1Mb&r2<0.1)	CRIM1(0)
rs58680090	2	56080379	a	t	0.2093	0.0702	0.037	0.0576	733973	-0.0556	0.0212	0.008751	753374	0.1237	0.0251	8.045e-07	733987	1.82606e-09	5.49343e-09	0.00488095	new(<1Mb&r2<0.1)	.
rs11678149	2	67045396	t	g	0.0897	-0.0438	0.0527	0.4057	728704	0.1374	0.0302	5.474e-06	747964	-0.178	0.0358	6.566e-07	728689	1.3353e-13	3.19659e-11	0.0115245	new(<1Mb&r2<0.1)	.
rs114097040	2	85519593	a	g	0.9835	0.1234	0.1296	0.341	636974	-0.256	0.0739	0.0005271	653661	0.3688	0.0877	2.614e-05	637843	1.67092e-09	3.98673e-08	0.0239151	new(<1Mb&r2<0.1)	TCF7L1(0)
rs6543301	2	98749470	a	t	0.5762	-0.016	0.0304	0.5987	733171	0.0604	0.0174	0.000535	752461	-0.0804	0.0207	9.949e-05	733166	3.50179e-08	9.14553e-07	0.0525275	new(<1Mb&r2<0.1)	VWA3B(0)
rs4851760	2	105993859	a	g	0.5894	0.0542	0.0306	0.07684	731674	-0.0529	0.0176	0.002593	751028	0.1037	0.0208	5.875e-07	731680	1.62838e-10	9.26642e-10	0.238515	new(<1Mb&r2<0.1)	FHL2(0)
rs12988588	2	177001056	a	g	0.3465	-0.0373	0.0324	0.2498	704954	0.0689	0.0185	0.0002012	724353	-0.107	0.022	1.098e-06	704923	3.18575e-11	1.14137e-09	0.363059	new(<1Mb&r2<0.1)	HOXD-AS2(0)
rs147410305	2	179040421	t	c	0.0362	0.0146	0.0872	0.8674	676067	0.2031	0.0501	5.104e-05	694636	-0.1728	0.0592	0.00351	676181	4.18767e-08	3.45584e-06	0.019923	new(<1Mb&r2<0.1)	.
rs6435942	2	217425937	t	g	0.3494	0.0526	0.0315	0.09534	734537	-0.0546	0.0181	0.002484	753960	0.1081	0.0214	4.183e-07	734535	3.29852e-10	2.10769e-09	0.0137173	new(<1Mb&r2<0.1)	.
rs76022619	2	218251712	c	g	0.902	0.0509	0.0511	0.3188	723838	-0.0889	0.0292	0.002379	743077	0.149	0.0347	1.726e-05	723840	3.92289e-08	4.25161e-07	0.0122656	new(<1Mb&r2<0.1)	DIRC3(0)
rs6737386	2	219592322	a	g	0.4813	-0.0055	0.0302	0.856	731006	-0.0765	0.0173	9.836e-06	750376	0.073	0.0205	0.0003648	731009	2.2909e-09	4.39301e-07	0.00330701	new(<1Mb&r2<0.1)	TTLL4(0)
rs907683	2	220299541	t	g	0.5754	0.0392	0.033	0.2359	630049	-0.0713	0.0188	0.0001542	646869	0.1056	0.0224	2.464e-06	630048	1.22284e-11	5.14941e-10	0.00287132	new(<1Mb&r2<0.1)	.
rs12988743	2	220351471	t	c	0.9292	0.0849	0.0664	0.2006	597016	0.1968	0.0376	1.688e-07	612883	-0.1166	0.0449	0.009479	596983	1.024e-08	1.01244e-05	0.330282	new(<1Mb&r2<0.1)	SPEG(0)
rs12624154	2	238647468	c	g	0.2092	-0.0673	0.0377	0.07432	707471	0.0567	0.0216	0.008765	726616	-0.1233	0.0255	1.359e-06	707489	4.15458e-09	1.38105e-08	0.0886168	new(<1Mb&r2<0.1)	LRRFIP1(0)|=missense
rs12635190	3	27656492	t	c	0.3611	-0.0549	0.0316	0.08273	721576	0.0515	0.0181	0.004526	740496	-0.1077	0.0215	5.272e-07	721576	8.89378e-10	4.30646e-09	0.154287	new(<1Mb&r2<0.1)	.
rs7427574	3	38684835	c	g	0.8094	-0.1084	0.0386	0.005005	722763	0.0284	0.0222	0.1999	742172	-0.1296	0.0262	7.488e-07	722773	1.58579e-07	3.64113e-08	0.00015667	new(<1Mb&r2<0.1)	SCN5A(0)
rs13093299	3	41810220	a	g	0.8443	-0.0141	0.0441	0.7493	668131	0.1214	0.0251	1.266e-06	687456	-0.1229	0.0299	4.022e-05	668120	7.79994e-13	4.70318e-10	0.000160513	new(<1Mb&r2<0.1)	ULK4(0)
rs112945648	3	41969042	t	c	0.9783	0.1688	0.1158	0.1448	648318	-0.2873	0.0657	1.223e-05	665927	0.4155	0.0782	1.071e-07	648631	2.35025e-15	3.49228e-13	0.000807291	new(<1Mb&r2<0.1)	ULK4(0)
rs4974008	3	42159351	t	c	0.3223	0.0484	0.0326	0.1374	717712	-0.0528	0.0187	0.004722	737044	0.093	0.0221	2.641e-05	717692	7.19832e-09	3.97704e-08	0.820161	new(<1Mb&r2<0.1)	TRAK1(0)
rs142048131	3	42211838	t	g	0.0183	0.0874	0.1259	0.4874	612539	0.3516	0.0724	1.197e-06	628056	-0.2211	0.0854	0.009593	612331	2.46631e-09	1.13439e-06	0.00666765	new(<1Mb&r2<0.1)	TRAK1(0)
rs7649323	3	53332706	c	g	0.3632	0.0436	0.0315	0.1653	732094	-0.0491	0.018	0.006527	751487	0.0937	0.0213	1.083e-05	732086	3.22055e-08	1.72564e-07	9.64796e-05	new(<1Mb&r2<0.1)	DCP1A(0)
rs6785570	3	141603887	a	g	0.36	0.0643	0.0315	0.0415	732389	-0.0485	0.0181	0.007446	751818	0.1066	0.0214	6.2e-07	732387	3.67562e-10	1.00553e-09	0.00615435	new(<1Mb&r2<0.1)	ATP1B3(0)
rs6445040	3	171858523	a	g	0.6686	-0.0236	0.0333	0.4798	670858	0.0753	0.0191	8.415e-05	689421	-0.1029	0.0226	5.326e-06	670883	1.54096e-10	9.5213e-09	0.00657132	new(<1Mb&r2<0.1)	FNDC3B(0)
rs80051645	4	40128683	t	c	0.9232	0.1292	0.0575	0.02471	717434	-0.0634	0.033	0.05513	736563	0.1843	0.039	2.362e-06	717431	4.83523e-08	4.12427e-08	0.0449372	new(<1Mb&r2<0.1)	N4BP2(0)
rs1346082	4	54960782	a	t	0.7679	0.0876	0.0384	0.02238	642813	-0.0519	0.0219	0.01771	660393	0.1309	0.026	4.796e-07	642728	8.48098e-10	1.33024e-09	0.348293	new(<1Mb&r2<0.1)	.
rs2452554	4	95409802	t	c	0.2375	-0.0313	0.0358	0.3816	721026	0.0724	0.0205	0.0004241	740407	-0.1034	0.0243	2.026e-05	721039	1.66062e-09	4.37839e-08	9.48809e-06	new(<1Mb&r2<0.1)	PDLIM5(0)
rs11725517	4	149024481	t	c	0.5039	0.0233	0.0301	0.4385	733476	-0.0567	0.0173	0.00102	752701	0.0774	0.0204	0.0001526	733463	2.85369e-08	4.6873e-07	0.587408	new(<1Mb&r2<0.1)	NR3C2(0)
rs2721770	5	71126453	a	g	0.718	0.0431	0.0336	0.1993	729319	-0.0609	0.0192	0.001539	748503	0.0919	0.0228	5.525e-05	729334	1.6787e-09	1.9635e-08	0.00607684	new(<1Mb&r2<0.1)	.
rs12659220	5	72950155	t	c	0.7187	-0.0028	0.0337	0.9346	723002	0.0737	0.0193	0.0001403	742277	-0.0651	0.0229	0.004379	723021	4.86936e-08	2.58546e-06	0.326856	new(<1Mb&r2<0.1)	ARHGEF28(0)
rs13177718	5	108113344	t	c	0.0754	0.0862	0.0571	0.1313	735885	-0.0873	0.0327	0.00769	755091	0.158	0.0388	4.615e-05	735863	2.12203e-08	9.342e-08	0.00766636	new(<1Mb&r2<0.1)	FER(0)
rs6890713	5	122419782	t	c	0.9691	0.1055	0.089	0.236	712120	-0.1918	0.0508	0.0001598	731348	0.3045	0.0603	4.448e-07	712178	1.46305e-11	5.7627e-10	0.0804673	new(<1Mb&r2<0.1)	.
rs34909326	5	122631685	t	g	0.2282	0.0365	0.0363	0.3157	716628	-0.0775	0.0208	0.0001972	735720	0.1199	0.0246	1.136e-06	716669	1.03208e-10	3.73946e-09	0.00440203	new(<1Mb&r2<0.1)	.
rs10056714	5	173205058	a	g	0.6084	0.0293	0.0315	0.3519	704929	0.0862	0.018	1.779e-06	724284	-0.0503	0.0214	0.01878	704944	2.66281e-08	9.75919e-06	0.328079	new(<1Mb&r2<0.1)	.
rs1801020	5	176836532	a	g	0.2536	-0.0234	0.036	0.5148	686136	-0.0949	0.0205	3.743e-06	705482	0.0656	0.0244	0.007244	686138	1.37945e-08	3.99528e-06	0.082553	new(<1Mb&r2<0.1)	F12(0)
rs10793848	6	7488116	t	g	0.3409	0.0545	0.0324	0.09276	708166	-0.0457	0.0186	0.01395	727032	0.0994	0.022	6.54e-06	708158	3.49853e-08	9.71989e-08	0.212029	new(<1Mb&r2<0.1)	.
rs12206583	6	12419230	t	c	0.5979	-0.0881	0.0307	0.004057	735038	0.0205	0.0176	0.2441	754440	-0.1073	0.0208	2.512e-07	735056	2.42028e-07	4.87757e-08	0.000280506	new(<1Mb&r2<0.1)	.
rs2273671	6	25115296	t	g	0.1794	-0.0954	0.0393	0.0152	734239	0.0451	0.0225	0.0455	753622	-0.1386	0.0267	2.116e-07	734231	6.66288e-09	5.28696e-09	5.43221e-05	new(<1Mb&r2<0.1)	CMAHP(0)
rs9366608	6	25236876	a	g	0.3758	-0.0198	0.0313	0.5279	723075	0.0631	0.0179	0.0004313	742414	-0.0787	0.0213	0.000212	723061	1.06494e-08	3.03322e-07	0.00431067	new(<1Mb&r2<0.1)	.
rs115529844	6	29818021	t	c	0.663	0.0011	0.0343	0.9744	648425	-0.1064	0.0195	5.09e-08	667774	0.0987	0.0232	2.159e-05	648405	1.67087e-14	5.56628e-11	NA	new(<1Mb&r2<0.1)	.
rs115762673	6	30421502	a	g	0.3979	-0.0292	0.0333	0.3816	637683	0.0621	0.019	0.001058	657089	-0.0915	0.0227	5.436e-05	637725	1.51176e-08	2.56753e-07	NA	new(<1Mb&r2<0.1)	.
rs115270067	6	30993499	t	c	0.6036	0.0518	0.0333	0.12	641140	-0.0644	0.0189	0.0006808	660411	0.1112	0.0227	9.365e-07	641096	2.1916e-11	3.74173e-10	NA	new(<1Mb&r2<0.1)	MUC22(0)
rs10081055	6	33817796	t	g	0.6721	0.1001	0.0329	0.002317	702257	-0.0186	0.0188	0.3221	721235	0.1013	0.0223	5.686e-06	702285	2.77824e-07	4.03436e-08	0.358158	new(<1Mb&r2<0.1)	.
rs148260186	6	36641993	a	c	0.0249	-0.2092	0.1004	0.03724	712049	0.1529	0.0577	0.008016	730647	-0.3446	0.0682	4.429e-07	712111	3.44012e-10	8.62051e-10	0.0292671	new(<1Mb&r2<0.1)	PANDAR(0)
rs7763616	6	55611009	t	g	0.3521	0.0246	0.0315	0.4348	734284	0.0841	0.018	3.191e-06	753684	-0.0648	0.0214	0.002442	734281	2.36534e-08	6.99914e-06	0.00509268	new(<1Mb&r2<0.1)	.
rs9362083	6	85396119	a	t	0.5811	0.0187	0.0305	0.5407	736150	-0.0804	0.0175	4.4e-06	755580	0.1018	0.0207	8.564e-07	736141	6.09241e-13	1.6825e-10	0.106427	new(<1Mb&r2<0.1)	.
rs4053778	6	85988429	a	g	0.6088	0.0655	0.0311	0.035	724210	-0.0413	0.0178	0.02045	743430	0.1078	0.0211	3.217e-07	724262	5.01876e-09	8.31379e-09	0.00874192	new(<1Mb&r2<0.1)	.
rs75464514	6	121766582	t	c	0.0284	-0.3786	0.1214	0.001808	697424	0.0712	0.0702	0.3103	715771	-0.4417	0.0834	1.168e-07	697269	1.62456e-07	1.84392e-08	0.000583585	new(<1Mb&r2<0.1)	GJA1(0)
rs187061061	6	122308427	t	c	0.0189	-0.2075	0.1152	0.07166	705338	0.1522	0.0659	0.02091	724281	-0.3663	0.0781	2.763e-06	705181	4.85469e-08	1.05312e-07	0.00146997	new(<1Mb&r2<0.1)	.
rs198654	6	143170004	a	c	0.9197	0.0328	0.0561	0.5585	723227	0.1537	0.0321	1.694e-06	742396	-0.115	0.0381	0.002554	723216	2.08937e-09	8.82613e-07	0.135872	new(<1Mb&r2<0.1)	HIVEP2(0)
rs9390083	6	143647665	c	g	0.83	0.0119	0.0403	0.7674	725858	-0.1071	0.0231	3.655e-06	745256	0.1133	0.0274	3.477e-05	725867	6.64519e-12	2.16026e-09	0.000489063	new(<1Mb&r2<0.1)	AIG1(0)
rs190038209	6	152221181	t	c	0.0257	0.1355	0.103	0.1885	643771	-0.1838	0.0588	0.001766	660812	0.3199	0.07	4.841e-06	643253	1.94795e-09	2.09465e-08	0.382914	new(<1Mb&r2<0.1)	ESR1(0)
rs142218895	6	152289145	t	c	0.0219	0.1427	0.1094	0.1921	677464	-0.226	0.0623	0.0002869	695965	0.3789	0.0743	3.38e-07	677284	2.22504e-11	6.3642e-10	0.00697475	new(<1Mb&r2<0.1)	ESR1(0)
rs72501758	6	157360754	a	t	0.1776	-0.0248	0.0411	0.5454	684756	-0.1046	0.0235	8.768e-06	702871	0.0761	0.0279	0.006401	684806	3.94109e-08	7.37325e-06	0.0490699	new(<1Mb&r2<0.1)	ARID1B(0)
rs17184914	6	159861662	a	g	0.9702	-0.1645	0.0926	0.07555	694499	0.1456	0.0528	0.005875	712427	-0.3017	0.0626	1.413e-06	694517	1.39969e-09	6.14432e-09	0.000567064	new(<1Mb&r2<0.1)	.
rs144040245	7	19030296	c	g	0.9832	-0.3346	0.13	0.01008	618057	0.1311	0.0737	0.07518	635318	-0.4454	0.088	4.115e-07	618025	1.35856e-08	8.1507e-09	0.00850294	new(<1Mb&r2<0.1)	HDAC9(0)
rs62457627	7	45963445	c	g	0.9535	0.1698	0.0803	0.03449	602348	-0.1112	0.0458	0.01526	619203	0.2706	0.0544	6.414e-07	602348	1.84188e-09	3.69072e-09	1.22514e-09	new(<1Mb&r2<0.1)	.
rs73108574	7	46029073	a	g	0.0179	-0.1707	0.1275	0.1805	602342	0.2126	0.0726	0.003394	618548	-0.3756	0.0864	1.374e-05	602139	8.70052e-09	6.86696e-08	0.00911655	new(<1Mb&r2<0.1)	.
rs229897	7	73713121	a	g	0.7387	0.0418	0.037	0.2584	641295	-0.08	0.0211	0.0001515	660320	0.1137	0.0251	5.749e-06	641283	2.01929e-11	8.56136e-10	0.0108164	new(<1Mb&r2<0.1)	CLIP2(0)
rs149028628	7	91277889	t	c	0.0741	0.1685	0.059	0.004332	704739	-0.0518	0.0338	0.1261	723249	0.2177	0.04	5.398e-08	704631	1.48006e-08	4.16029e-09	0.0866113	new(<1Mb&r2<0.1)	.
rs202228979	7	100200674	t	c	0.4585	-0.0306	0.0321	0.3403	659961	-0.0984	0.0183	7.691e-08	679179	0.0694	0.0218	0.00141	660013	2.14079e-10	3.75232e-07	NA	new(<1Mb&r2<0.1)	PCOLCE(0)|PCOLCE-AS1(0)
rs221795	7	100283261	t	c	0.6396	0.0213	0.0317	0.5021	722925	-0.0875	0.0182	1.569e-06	742361	0.1083	0.0215	4.867e-07	722931	3.70847e-14	1.7001e-11	0.00937767	new(<1Mb&r2<0.1)	GIGYF1(0)
rs35799997	7	100764995	a	c	0.7784	0.0344	0.0363	0.343	733586	-0.0971	0.0208	3.159e-06	752996	0.1226	0.0246	6.54e-07	733591	1.23631e-14	3.81993e-12	1.06707e-07	new(<1Mb&r2<0.1)	.
rs12335048	8	17788261	t	c	0.39	-0.044	0.031	0.1565	724910	0.053	0.0178	0.00296	744190	-0.0919	0.0211	1.292e-05	724910	3.18467e-09	2.31159e-08	0.00352561	new(<1Mb&r2<0.1)	PCM1(0)
rs55825400	8	76068956	a	g	0.0279	0.0878	0.0961	0.3613	681946	-0.1961	0.0549	0.0003577	700206	0.2795	0.0653	1.882e-05	681885	8.70953e-10	2.52524e-08	0.00100052	new(<1Mb&r2<0.1)	.
rs929953	8	120220033	a	g	0.2737	-0.043	0.0343	0.2097	715648	0.0681	0.0197	0.0005402	734905	-0.1105	0.0233	2.088e-06	715670	1.65151e-10	3.03515e-09	0.000120504	new(<1Mb&r2<0.1)	.
rs147597028	8	140719143	a	c	0.0107	-0.295	0.1613	0.06739	622628	0.2488	0.092	0.006866	641241	-0.5188	0.1095	2.168e-06	622556	1.48891e-09	5.74843e-09	0.899318	new(<1Mb&r2<0.1)	.
rs728304	9	13745849	t	g	0.6157	0.0718	0.0311	0.02073	731032	-0.0422	0.0179	0.01863	742791	0.1028	0.0211	1.169e-06	731020	8.16344e-10	1.05215e-09	0.00611723	new(<1Mb&r2<0.1)	.
rs1322277	9	112479923	c	g	0.7054	-0.0116	0.033	0.7257	735177	-0.0805	0.0191	2.465e-05	746951	0.0668	0.0225	0.002999	735176	3.88504e-08	4.13272e-06	0.00326437	new(<1Mb&r2<0.1)	PALM2(0)
rs2886307	9	136050340	a	g	0.294	-0.0035	0.0331	0.9146	735213	-0.0897	0.0191	2.572e-06	746943	0.0762	0.0225	0.0007232	735218	9.92563e-11	3.38941e-08	0.0363714	new(<1Mb&r2<0.1)	.
rs11999532	9	139371405	c	g	0.2751	-0.0126	0.0335	0.7064	742079	0.0735	0.0194	0.0001458	753839	-0.0795	0.0228	0.0005027	742079	7.17252e-09	3.10279e-07	0.00406034	new(<1Mb&r2<0.1)	SEC16A(0)
rs691203	10	18222816	a	t	0.3844	-0.0753	0.0319	0.01823	697842	0.0459	0.0182	0.01186	717054	-0.116	0.0217	8.497e-08	697851	1.14824e-10	2.03892e-10	0.000480374	new(<1Mb&r2<0.1)	.
rs144338997	10	20513949	a	g	0.0135	0.1114	0.1571	0.4781	616537	-0.3363	0.0895	0.0001724	634894	0.47	0.1064	1.002e-05	616799	8.42024e-10	3.90004e-08	0.000908707	new(<1Mb&r2<0.1)	PLXDC2(0)
rs35482056	10	63893615	t	c	0.3219	0.0202	0.0323	0.5313	729428	-0.0756	0.0185	4.482e-05	748777	0.0987	0.022	7.228e-06	729439	8.06331e-11	7.07446e-09	0.260888	new(<1Mb&r2<0.1)	.
rs878177	10	100013815	t	c	0.3403	-0.0281	0.0318	0.3764	733611	0.0691	0.0182	0.0001505	753045	-0.0934	0.0216	1.505e-05	733609	1.44957e-10	6.46953e-09	5.86511e-07	new(<1Mb&r2<0.1)	LOXL4(0)|=missense
rs7073663	10	126358094	a	g	0.1624	-0.1019	0.041	0.01292	732455	0.0427	0.0235	0.06953	751864	-0.1345	0.0278	1.331e-06	732456	2.07015e-08	1.22742e-08	0.00025775	new(<1Mb&r2<0.1)	FAM53B(0)
rs4881734	11	1498379	a	g	0.0727	0.0698	0.0606	0.2497	677961	0.1798	0.0347	2.269e-07	696184	-0.0974	0.0412	0.0181	677933	5.05945e-09	4.43728e-06	0.332426	new(<1Mb&r2<0.1)	MOB2(0)
rs11023064	11	14068619	c	g	0.4182	0.0366	0.0305	0.2303	735652	0.0918	0.0175	1.602e-07	755055	-0.0559	0.0207	0.006958	735647	4.0522e-09	4.04061e-06	0.0219147	new(<1Mb&r2<0.1)	SPON1(0)
rs485171	11	30918487	a	g	0.4208	0.0387	0.0305	0.2047	731890	0.0887	0.0175	4.076e-07	751284	-0.0509	0.0207	0.01412	731896	2.87514e-08	1.71259e-05	0.138892	new(<1Mb&r2<0.1)	DCDC5(0)
rs7110194	11	44021038	c	g	0.5341	-0.0596	0.0302	0.04821	733778	0.0567	0.0173	0.001079	753208	-0.1096	0.0205	9.284e-08	733800	2.14841e-12	1.76264e-11	0.0267117	new(<1Mb&r2<0.1)	.
rs174580	11	61606642	a	g	0.6484	0.0511	0.0317	0.1066	729246	-0.0645	0.0181	0.0003795	748664	0.1169	0.0215	5.542e-08	729258	2.93344e-12	5.85353e-11	1.49481e-07	new(<1Mb&r2<0.1)	FADS2(0)
rs73527870	11	69957548	a	g	0.1231	0.0092	0.0469	0.8442	708714	0.1132	0.0268	2.451e-05	727835	-0.1035	0.0318	0.001143	708675	1.37733e-08	1.72065e-06	0.699959	new(<1Mb&r2<0.1)	ANO1(0)
rs11606817	11	89864492	t	g	0.874	0.0281	0.0492	0.5674	642242	0.128	0.0279	4.409e-06	660166	-0.102	0.0333	0.002203	642101	1.15929e-08	3.24031e-06	0.133884	new(<1Mb&r2<0.1)	.
rs12806983	11	130262144	a	g	0.0606	-0.1215	0.0691	0.07881	640205	0.1036	0.0394	0.008464	655724	-0.2257	0.0467	1.362e-06	640417	4.80692e-09	1.76186e-08	0.057818	new(<1Mb&r2<0.1)	.
rs112944024	11	130272385	t	g	0.9265	0.0612	0.0593	0.3021	706806	-0.1188	0.034	0.00048	725899	0.1774	0.0402	1.019e-05	706837	6.82865e-10	1.54528e-08	0.000515371	new(<1Mb&r2<0.1)	.
rs73044803	11	130289783	t	g	0.023	0.1566	0.109	0.1506	650076	-0.1746	0.0618	0.004722	667397	0.3064	0.074	3.48e-05	650191	9.95673e-09	6.65123e-08	0.0825546	new(<1Mb&r2<0.1)	ADAMTS8(0)
rs76059372	11	130450420	c	g	0.0443	0.0493	0.0793	0.5339	635357	-0.1833	0.0451	4.775e-05	652515	0.2299	0.0539	2.013e-05	635509	1.07258e-10	9.93838e-09	2.10345e-05	new(<1Mb&r2<0.1)	.
rs4766236	12	4443010	t	c	0.5077	0.0095	0.0304	0.7547	723900	0.0759	0.0175	1.483e-05	735635	-0.0603	0.0207	0.003617	723895	1.15883e-08	1.70669e-06	0.103202	new(<1Mb&r2<0.1)	C12orf5(0)
rs4762750	12	20485865	a	g	0.3131	-0.0345	0.0338	0.3077	680128	0.0598	0.0195	0.002138	690899	-0.0869	0.023	0.0001619	680106	2.72711e-08	2.70568e-07	0.0181825	new(<1Mb&r2<0.1)	.
rs143221941	12	53281262	a	g	0.0154	0.2531	0.1336	0.05811	642766	-0.1993	0.0767	0.009329	652778	0.4091	0.0911	7.081e-06	642733	2.31833e-09	6.55224e-09	0.0977574	new(<1Mb&r2<0.1)	.
rs34577247	12	57578673	a	g	0.0228	0.12	0.1101	0.2756	672694	-0.1967	0.0633	0.001895	683439	0.3107	0.0752	3.612e-05	672486	1.20169e-08	1.28504e-07	0.0906706	new(<1Mb&r2<0.1)	LRP1(0)
rs11177372	12	69179929	t	c	0.5968	0.0243	0.0305	0.4259	741581	-0.0825	0.0176	2.822e-06	753365	0.103	0.0208	7.22e-07	741577	4.00383e-14	1.18264e-11	0.000720207	new(<1Mb&r2<0.1)	.
rs113918189	12	94719017	t	c	0.0728	0.0025	0.0587	0.9664	721553	0.1439	0.0339	2.184e-05	733106	-0.1429	0.04	0.0003568	721555	3.37029e-09	4.02286e-07	4.68909e-06	new(<1Mb&r2<0.1)	CEP83(0)
rs11067344	12	115399935	t	c	0.1529	-0.0565	0.0416	0.1748	742074	0.0672	0.024	0.00514	753821	-0.1289	0.0284	5.533e-06	742074	2.18401e-08	1.17531e-07	0.0728691	new(<1Mb&r2<0.1)	.
rs61953394	12	123753372	t	c	0.9067	0.0201	0.052	0.6994	732245	-0.1478	0.0299	8.016e-07	744032	0.1793	0.0354	4.197e-07	732281	1.2403e-13	8.24251e-11	6.32535e-06	new(<1Mb&r2<0.1)	CDK2AP1(0)
rs906306	12	124941543	t	c	0.1206	0.0417	0.0467	0.372	728617	-0.0981	0.0269	0.0002686	740109	0.1327	0.0319	3.186e-05	728603	5.10797e-10	1.53491e-08	0.128235	new(<1Mb&r2<0.1)	NCOR2(0)
rs10846681	12	125003705	a	g	0.1699	0.0202	0.043	0.6391	645462	0.1327	0.0247	7.865e-08	657068	-0.1073	0.0294	0.0002618	645476	3.37987e-12	6.69755e-09	0.104713	new(<1Mb&r2<0.1)	NCOR2(0)
rs66656189	13	110907856	a	g	0.4325	0.0213	0.0318	0.5037	679698	0.0868	0.0183	2.101e-06	690994	-0.0601	0.0217	0.005561	679706	5.33155e-09	1.85714e-06	0.199878	new(<1Mb&r2<0.1)	COL4A1(0)
rs9555690	13	111013190	t	c	0.8715	-0.0457	0.0454	0.3141	724384	0.1146	0.0262	1.257e-05	736144	-0.148	0.0309	1.624e-06	724388	1.61225e-13	2.07332e-11	0.0203106	new(<1Mb&r2<0.1)	COL4A2(0)
rs11838776	13	111040681	a	g	0.2798	0.0384	0.0337	0.2556	724374	0.1004	0.0195	2.611e-07	735699	-0.0587	0.023	0.0107	724381	5.05511e-09	3.80595e-06	0.890796	new(<1Mb&r2<0.1)	COL4A2(0)
rs12894899	14	53930389	t	c	0.7594	0.0223	0.0352	0.5257	737572	0.0956	0.0203	2.496e-06	749319	-0.0646	0.024	0.007111	737569	5.26592e-09	1.67878e-06	0.0468061	new(<1Mb&r2<0.1)	.
rs3850306	14	59903104	a	c	0.4953	0.022	0.03	0.4636	742729	-0.0702	0.0173	5.153e-05	754460	0.0816	0.0205	6.649e-05	742743	4.16498e-11	3.00466e-09	0.000978691	new(<1Mb&r2<0.1)	.
rs75462826	14	92408087	a	g	0.0714	0.0108	0.0587	0.8547	728806	-0.1445	0.0339	2.012e-05	740453	0.1513	0.0399	0.0001516	728818	5.14337e-10	6.34566e-08	0.00963135	new(<1Mb&r2<0.1)	FBLN5(0)
rs1257446	14	99687773	t	c	0.7117	-0.0202	0.0331	0.5424	740234	0.0754	0.0191	8.13e-05	751945	-0.078	0.0226	0.0005388	740217	3.11015e-10	1.83209e-08	0.0333152	new(<1Mb&r2<0.1)	BCL11B(0)
rs11846404	14	104156108	c	g	0.6724	-0.0017	0.0319	0.9577	742945	-0.0872	0.0184	2.312e-06	754732	0.0834	0.0218	0.0001301	742964	4.34818e-11	1.66339e-08	0.383271	new(<1Mb&r2<0.1)	KLC1(0)
rs7164581	15	40645098	c	g	0.1635	-0.06	0.0408	0.1413	733918	0.0689	0.0235	0.00344	745619	-0.1269	0.0278	5.042e-06	733925	3.2179e-09	2.00664e-08	0.0015384	new(<1Mb&r2<0.1)	PHGR1(0)
rs34899815	15	42254068	t	c	0.2511	-0.017	0.0363	0.6394	681055	0.0757	0.0208	0.0002784	692223	-0.0815	0.0247	0.0009678	681037	1.34961e-08	4.84313e-07	0.188561	new(<1Mb&r2<0.1)	EHD4(0)
rs62020459	15	50225447	a	g	0.9495	0.1616	0.0759	0.03338	620536	-0.0969	0.0436	0.02628	630585	0.2399	0.0518	3.581e-06	620489	9.80608e-09	1.32844e-08	0.0523997	new(<1Mb&r2<0.1)	ATP8B4(0)
rs7161970	15	67036982	t	c	0.3418	-0.0145	0.0318	0.6492	734220	0.0766	0.0183	2.93e-05	745471	-0.0842	0.0216	0.0001005	734207	1.22933e-10	1.29613e-08	0.030706	new(<1Mb&r2<0.1)	SMAD6(0)
rs7173811	15	67479051	t	c	0.473	0.0318	0.0305	0.2973	717939	-0.0608	0.0176	0.0005583	729693	0.0949	0.0208	5.148e-06	717915	8.79459e-10	1.67756e-08	0.000343433	new(<1Mb&r2<0.1)	SMAD3(0)
rs2012437	15	68219702	a	g	0.8439	0.0552	0.0417	0.1848	731806	-0.0671	0.0241	0.005346	743489	0.1295	0.0284	5.308e-06	731774	3.16334e-08	1.6639e-07	0.026241	new(<1Mb&r2<0.1)	.
rs16957846	15	73677041	t	c	0.7856	-0.0313	0.0368	0.3955	731391	0.0798	0.0212	0.0001736	743134	-0.1081	0.0251	1.613e-05	731365	2.47429e-10	9.49613e-09	0.066703	new(<1Mb&r2<0.1)	.
rs7178859	15	83514673	t	c	0.2161	0.0251	0.0364	0.4907	740618	-0.0705	0.021	0.0007966	752353	0.0967	0.0248	9.885e-05	740620	2.68841e-08	5.00615e-07	0.0126884	new(<1Mb&r2<0.1)	.
rs75612420	15	84575186	t	c	0.0772	0.0806	0.0581	0.1655	707037	-0.1087	0.0334	0.001123	718607	0.179	0.0396	6.087e-06	707086	3.58975e-10	4.16458e-09	0.00409883	new(<1Mb&r2<0.1)	ADAMTSL3(0)
rs1444860	15	95806134	a	g	0.793	0.0298	0.0378	0.4299	716059	-0.0901	0.0217	3.309e-05	727771	0.1178	0.0257	4.57e-06	716053	1.09022e-11	1.01903e-09	0.0402172	new(<1Mb&r2<0.1)	.
rs11548855	16	68337948	t	c	0.9261	0.0614	0.0619	0.3214	668149	0.1699	0.0354	1.579e-06	679766	-0.0932	0.0421	0.02687	668226	3.73234e-08	1.35129e-05	0.00195051	new(<1Mb&r2<0.1)	SLC7A6OS(0)
rs7196350	16	69434108	a	g	0.8292	-0.008	0.0416	0.8477	685816	0.0919	0.0239	0.000123	697280	-0.0997	0.0284	0.0004352	685774	1.78287e-08	9.65164e-07	0.528071	new(<1Mb&r2<0.1)	.
rs1551526	16	70748408	t	g	0.5192	0.0668	0.0305	0.02883	715330	-0.0402	0.0176	0.02251	727027	0.1048	0.0208	4.664e-07	715340	3.85236e-09	4.94277e-09	0.0154756	new(<1Mb&r2<0.1)	VAC14(0)
rs9940707	16	71800962	t	g	0.5097	0.0774	0.0301	0.01009	735936	-0.028	0.0174	0.1069	747695	0.0979	0.0205	1.787e-06	735926	6.44614e-08	2.49631e-08	0.0780664	new(<1Mb&r2<0.1)	AP1G1(0)
rs116864809	16	72595140	t	c	0.9853	0.0179	0.1367	0.896	653626	0.3502	0.0784	7.849e-06	664394	-0.2975	0.0926	0.001319	653765	1.03583e-09	2.19372e-07	NA	new(<1Mb&r2<0.1)	.
rs79198994	16	72793006	t	c	0.9305	0.1426	0.0648	0.02767	636415	-0.0911	0.0372	0.01432	647115	0.2106	0.0441	1.748e-06	636495	8.24168e-10	1.40661e-09	0.0081539	new(<1Mb&r2<0.1)	.
rs78328051	16	82732586	a	g	0.0336	0.0118	0.0914	0.8971	650610	-0.2136	0.0526	4.841e-05	660675	0.2312	0.0625	0.0002141	650475	4.65137e-09	3.87646e-07	0.000199728	new(<1Mb&r2<0.1)	CDH13(0)
rs6565077	16	82939333	a	g	0.4992	0.0401	0.0302	0.1845	731689	-0.0488	0.0174	0.005109	743451	0.0891	0.0206	1.498e-05	731695	2.60289e-08	1.46313e-07	5.94161e-06	new(<1Mb&r2<0.1)	CDH13(0)
rs4416072	17	4570036	t	c	0.241	0.0318	0.0359	0.3766	712573	0.0981	0.0208	2.473e-06	712577	-0.0604	0.0244	0.01335	712556	2.84173e-08	8.08955e-06	0.0736706	new(<1Mb&r2<0.1)	#NAME?
rs35985803	17	7254315	a	g	0.0803	-0.0464	0.0576	0.4204	692260	0.1098	0.0331	0.0009148	703680	-0.1419	0.0391	0.000289	692277	1.65623e-08	2.89005e-07	0.00146292	new(<1Mb&r2<0.1)	ACAP1(0)
rs11652508	17	7629723	a	g	0.3675	0.002	0.0325	0.9516	686498	0.0886	0.0187	2.12e-06	697628	-0.0898	0.0221	4.846e-05	686529	4.8499e-11	1.91049e-08	5.05249e-05	new(<1Mb&r2<0.1)	DNAH2(0)
rs228747	17	42173782	c	g	0.4826	0.0508	0.031	0.1012	696494	-0.06	0.0179	0.0007935	707859	0.1016	0.0211	1.447e-06	696500	1.87634e-11	2.00184e-10	NA	new(<1Mb&r2<0.1)	HDAC5(0)
rs35769372	17	60745240	a	c	0.9379	0.0759	0.067	0.2576	658728	-0.126	0.0383	0.001006	669112	0.1898	0.0456	3.117e-05	658722	1.89336e-09	2.93163e-08	0.00184672	new(<1Mb&r2<0.1)	MRC2(0)
rs1801690	17	64208285	c	g	0.9439	0.0499	0.0656	0.4466	732201	-0.1458	0.038	0.0001241	743899	0.165	0.0446	0.0002188	732270	2.54135e-10	1.07571e-08	1.44608e-05	new(<1Mb&r2<0.1)	APOH(0)|=MISSENSE
rs8096960	18	10741242	t	g	0.7257	0.0263	0.0336	0.4342	739457	0.0953	0.0194	8.97e-07	751209	-0.063	0.0229	0.00598	739458	2.7852e-09	1.37555e-06	0.00214016	new(<1Mb&r2<0.1)	PIEZO2(0)
rs12455124	18	25765493	t	g	0.7813	-0.0262	0.0366	0.4749	728040	0.0968	0.0211	4.646e-06	739780	-0.1037	0.025	3.274e-05	728024	2.46841e-13	5.98467e-11	0.15822	new(<1Mb&r2<0.1)	.
rs2852780	18	42276988	a	g	0.1318	-0.017	0.0448	0.7044	729382	-0.1173	0.0258	5.511e-06	741001	0.0983	0.0306	0.001294	729421	3.25324e-09	7.62704e-07	0.00119697	new(<1Mb&r2<0.1)	SETBP1(0)
rs80076900	19	10056320	t	c	0.0495	-0.0091	0.0729	0.9002	684198	-0.188	0.0419	7.182e-06	694996	0.1728	0.0497	0.0005077	684164	8.07987e-10	1.75173e-07	0.0511725	new(<1Mb&r2<0.1)	.
rs9676419	19	17367435	t	c	0.7693	0.0395	0.036	0.2722	729895	0.104	0.0208	5.492e-07	741621	-0.0654	0.0246	0.007737	729896	1.31775e-08	6.98397e-06	0.00255564	new(<1Mb&r2<0.1)	USHBP1(0)|=MISSENSE
rs11670056	19	18589943	t	c	0.0749	0.1009	0.0595	0.08968	696499	-0.1063	0.0342	0.001903	707231	0.2096	0.0404	2.187e-07	696530	1.16089e-10	8.41585e-10	1.05998e-07	new(<1Mb&r2<0.1)	ELL(0)
rs79226653	20	4229859	t	g	0.7848	0.0042	0.0369	0.9105	722833	0.0945	0.0213	8.963e-06	734494	-0.095	0.0251	0.0001585	722825	1.10181e-09	2.02673e-07	0.0193432	new(<1Mb&r2<0.1)	.
rs36224662	20	10412596	t	c	0.4629	0.0007	0.0382	0.9855	644773	-0.1053	0.0216	1.083e-06	654614	0.0974	0.0261	0.0001853	644884	8.3411e-12	5.95756e-09	0.566239	new(<1Mb&r2<0.1)	MKKS(0)
rs76608422	20	10550544	t	c	0.0668	0.0396	0.0617	0.521	707023	-0.1409	0.0356	7.496e-05	717919	0.1865	0.042	9.005e-06	706949	2.20858e-10	1.31845e-08	0.0325006	new(<1Mb&r2<0.1)	SLX4IP(0)
rs6136670	20	19258891	t	c	0.7253	0.01	0.0337	0.7679	734299	-0.0818	0.0194	2.583e-05	745857	0.0883	0.023	0.0001231	734308	3.30366e-10	3.79669e-08	0.102739	new(<1Mb&r2<0.1)	LOC100130264(0)|SLC24A3(0)
rs2207091	20	19329075	c	g	0.6141	0.0177	0.0308	0.5662	739973	0.0788	0.0178	9.701e-06	751696	-0.0537	0.021	0.01054	739977	3.41814e-08	5.61721e-06	0.026276	new(<1Mb&r2<0.1)	SLC24A3(0)|=missense
rs34616810	20	19571379	t	g	0.0393	0.111	0.0864	0.1988	645586	-0.143	0.0492	0.003648	656113	0.241	0.0587	3.992e-05	645849	1.54217e-08	1.2094e-07	0.0130646	new(<1Mb&r2<0.1)	SLC24A3(0)
rs3787316	20	48017366	t	c	0.4244	0.0005	0.0306	0.9869	733637	0.0761	0.0176	1.557e-05	745398	-0.0719	0.0208	0.0005579	733632	1.45738e-09	2.17266e-07	0.572057	new(<1Mb&r2<0.1)	KCNB1(0)
rs2251130	21	30600776	a	g	0.6257	-0.0787	0.0313	0.01184	729475	0.0389	0.0181	0.03153	741052	-0.1073	0.0213	4.572e-07	729483	1.09772e-09	7.93716e-10	0.0900376	new(<1Mb&r2<0.1)	LINC00189(0)
rs2836458	21	39893041	a	g	0.4306	-0.0152	0.0304	0.6163	738120	0.0891	0.0175	3.678e-07	749880	-0.0983	0.0207	1.967e-06	738123	8.39278e-15	7.93626e-12	0.0214447	new(<1Mb&r2<0.1)	ERG(0)
rs8132203	21	40034720	a	t	0.0504	0.0032	0.0739	0.9654	653880	-0.1659	0.0425	9.548e-05	664137	0.1527	0.0503	0.002407	653792	3.16439e-08	1.91687e-06	0.242509	new(<1Mb&r2<0.1)	.
rs2836635	21	40069850	a	g	0.5102	0.0458	0.0301	0.128	734002	-0.0602	0.0174	0.0005441	745293	0.095	0.0205	3.636e-06	734021	1.77523e-11	2.46504e-10	0.00603406	new(<1Mb&r2<0.1)	.
rs998528	21	40071724	t	c	0.5204	-0.0538	0.0304	0.07657	725025	0.0477	0.0176	0.006582	736266	-0.0972	0.0207	2.617e-06	725029	2.33751e-09	7.63073e-09	0.0439546	new(<1Mb&r2<0.1)	.
rs2231398	22	29656389	t	g	0.3629	0.0038	0.0315	0.9033	729267	0.0764	0.0182	2.601e-05	740951	-0.0751	0.0214	0.0004652	729293	8.8405e-09	9.44644e-07	0.103439	new(<1Mb&r2<0.1)	RHBDD3(0)
Signals not reported by UK Biobank-ICBP but have been reported in liturature
rs61787668	1	9244280	t	g	0.2771	0.0276	0.0346	0.4243	697696	-0.0659	0.0198	0.000861	715848	0.0825	0.0235	0.0004336	697743	1.62283e-08	3.04316e-07	1.10258e-07	known	.
rs143348849	1	86845824	t	c	0.9517	0.2717	0.0715	0.0001435	718411	-0.0033	0.0411	0.9355	737499	0.2537	0.0485	1.681e-07	718389	1.77073e-06	4.64461e-08	0.105477	known	ODF2L(0)
rs13382862	2	20882449	a	g	0.3638	0.0664	0.0315	0.03473	724226	-0.0367	0.018	0.0421	743135	0.0983	0.0214	4.25e-06	724238	4.86359e-08	5.79263e-08	0.0388903	known	.
rs6737995	2	55819752	t	c	0.2016	-0.0427	0.0378	0.2593	725163	-0.1128	0.0217	1.967e-07	744592	0.0643	0.0257	0.01234	725162	3.5587e-09	3.25063e-06	0.0219211	known	SMEK2(0)
rs2631668	2	66105312	a	g	0.5297	-0.0351	0.0301	0.2443	732551	0.0586	0.0173	0.0007041	751946	-0.1008	0.0204	8.193e-07	732552	6.1824e-10	1.03801e-08	0.00114095	known	.
rs6546857	2	73837955	a	g	0.764	-0.0504	0.0356	0.1566	728692	-0.1083	0.0204	1.086e-07	748036	0.0618	0.0241	0.01044	728703	1.19167e-08	1.22278e-05	0.0182505	known	#NAME?
rs2284932	2	208012509	a	g	0.4062	0.0446	0.0308	0.1481	725047	-0.0636	0.0177	0.0003127	744358	0.0996	0.0209	1.94e-06	725056	9.05027e-12	1.89252e-10	0.181418	known	KLF7(0)
rs17059668	4	174584663	c	g	0.9224	-0.1556	0.0576	0.006915	703382	0.0665	0.033	0.04394	722164	-0.2091	0.0391	8.879e-08	703331	7.73961e-10	4.41336e-10	0.00281059	known	.
rs6866175	5	71089718	t	c	0.1565	-0.0966	0.0435	0.02649	668934	0.0554	0.025	0.02659	687382	-0.1529	0.0296	2.312e-07	668915	5.31934e-09	6.45319e-09	0.000127486	known	.
rs255287	5	123168532	t	c	0.5417	-0.0279	0.0302	0.3563	733254	-0.0905	0.0173	1.836e-07	752665	0.0569	0.0205	0.005532	733256	5.7591e-10	6.57476e-07	0.123319	known	.
rs2277923	5	172662024	t	c	0.6991	-0.0244	0.034	0.4733	690444	0.0813	0.0195	2.939e-05	709712	-0.0996	0.023	1.544e-05	690455	1.69299e-11	1.70503e-09	0.000867234	known	NKX2-5(0)
rs147802096	6	36640585	a	t	0.9255	0.0248	0.058	0.6683	723596	0.1455	0.0332	1.164e-05	742862	-0.1123	0.0393	0.004312	723591	1.94786e-08	3.25916e-06	2.88267e-07	known	.
rs4342401	6	169016615	a	t	0.5414	0.0639	0.0304	0.03573	725346	-0.0388	0.0174	0.02609	744650	0.1043	0.0207	4.447e-07	725341	1.09831e-08	1.62494e-08	0.0248162	known	SMOC2(0)
rs2285332	7	92241633	c	g	0.2481	0.0283	0.0353	0.4232	716999	-0.0655	0.0203	0.001224	735870	0.0873	0.024	0.0002737	717017	3.52755e-08	5.22032e-07	0.000805353	known	CDK6(0)
rs6651140	8	32384916	a	g	0.733	0.0584	0.0342	0.08731	729262	-0.0687	0.0196	0.0004576	748690	0.1253	0.0232	6.689e-08	729274	2.27685e-12	3.52171e-11	0.349799	known	NRG1(0)
rs16892875	8	120785559	a	g	0.0824	-0.0791	0.0551	0.1509	736262	0.1057	0.0316	0.0008247	755643	-0.1771	0.0374	2.167e-06	736240	1.06691e-10	1.46462e-09	0.0659998	known	TAF2(0)|=missense
rs7093310	10	5662119	t	c	0.9016	0.0752	0.0512	0.1422	719048	-0.0818	0.0294	0.00538	738240	0.1713	0.0348	8.858e-07	719051	1.13912e-08	5.8906e-08	0.0001242	known	.
rs4747384	10	20065076	a	g	0.5166	-0.0182	0.0304	0.5504	722761	0.0922	0.0174	1.262e-07	742035	-0.1048	0.0207	3.967e-07	722766	3.20757e-16	5.96503e-13	0.000174199	known	.
rs10900114	10	45307205	t	c	0.8489	-0.0346	0.0422	0.412	726450	0.1172	0.0242	1.261e-06	745867	-0.1474	0.0287	2.74e-07	726455	6.14758e-15	3.03616e-12	0.154135	known	TMEM72-AS1(0)
rs7131157	11	16222478	t	c	0.5239	0.0388	0.0305	0.2027	719962	0.0899	0.0175	2.642e-07	739367	-0.0362	0.0207	0.07993	719962	1.69044e-08	1.20272e-05	0.0427747	known	SOX6(0)
rs2121648	11	92679433	t	g	0.2891	0.1058	0.0335	0.001603	725490	-0.0253	0.0192	0.1889	744845	0.1232	0.0228	6.263e-08	725490	9.8394e-09	1.47439e-09	2.58748e-05	known	.
rs2279013	11	117283091	t	c	0.6739	-0.0565	0.0323	0.08049	723930	0.0681	0.0186	0.0002444	743269	-0.1161	0.022	1.28e-07	723932	3.1993e-13	5.87093e-12	4.94718e-08	known	CEP164(0)
rs7953024	12	24773658	c	g	0.8239	0.064	0.0398	0.1082	727325	-0.0614	0.023	0.007585	739048	0.1287	0.0271	2.031e-06	727373	1.07349e-08	3.89103e-08	0.194246	known	.
rs11181393	12	42657902	a	g	0.8427	-0.0334	0.0421	0.4275	717555	-0.1233	0.0242	3.558e-07	729296	0.0813	0.0287	0.004625	717597	6.58203e-10	5.39266e-07	0.0314658	known	.
rs11857977	15	48645675	a	c	0.823	0.0826	0.0397	0.03777	723490	-0.06	0.0228	0.008554	743407	0.1363	0.0269	3.958e-07	731716	4.14062e-10	1.02506e-09	0.0125321	known	.
rs16958033	16	11187415	t	c	0.1068	0.1197	0.0485	0.01366	741037	-0.0527	0.028	0.05977	752769	0.1661	0.0331	5.301e-07	741032	1.46878e-08	8.58983e-09	8.75729e-05	known	CLEC16A(0)
rs56094641	16	53806453	a	g	0.5913	-0.0237	0.0305	0.4367	739220	0.0633	0.0176	0.0003357	751000	-0.079	0.0208	0.0001467	739219	1.92215e-09	5.35721e-08	8.88945e-07	known	FTO(0)
rs35103069	17	4108063	c	g	0.5709	0.0017	0.0304	0.9551	736530	-0.0857	0.0175	1.025e-06	748288	0.0882	0.0207	2.031e-05	736513	3.81331e-12	2.24083e-09	8.24432e-05	known	ANKFY1(0)
rs3135967	17	33313729	a	g	0.5238	0.0642	0.03	0.03248	739592	-0.0364	0.0174	0.03596	751376	0.1053	0.0205	2.728e-07	739596	2.80585e-08	2.81514e-08	0.00466548	known	LIG3(0)
rs78432982	19	41947242	c	g	0.6561	-0.0109	0.034	0.7482	644999	0.0709	0.0196	0.0002929	653497	-0.0797	0.0231	0.0005794	644939	4.41518e-08	1.45844e-06	0.0177652	known	.
rs75420009	20	10463371	t	c	0.0177	-0.0102	0.1231	0.9337	654649	0.2789	0.0704	7.406e-05	665019	-0.2616	0.0839	0.001819	654344	1.5662e-08	1.13153e-06	0.0866435	known	SLX4IP(0)
rs6088764	20	33793159	a	c	0.287	0.0482	0.0334	0.1495	729087	-0.0727	0.0193	0.0001688	740693	0.1178	0.0228	2.36e-07	729086	1.67714e-12	4.45258e-11	2.82048e-05	known	.
rs11701561	21	47823783	t	c	0.4916	-0.0542	0.0308	0.07854	710088	0.0613	0.0178	0.0005582	721852	-0.1058	0.0209	4.232e-07	710096	2.70629e-12	3.03099e-11	NA	known	PCNT(0)
	The variants following the same colors were in the same locus.

## Sheet: S Table 3
Supplementary Table 3: Novel Loci Associations with Other Traits from FUMA and GWAS Catalog: Novel loci where the sentinel SNP or proxies (r2≥0.8) is associated with other traits at genome-wide significance level.
GenomicLocus	IndSigSNP	chr	PMID	FirstAuth	Study	Trait	MappedGene
1	rs272564	1	29497042	Verweij N	Genetic study links components of the autonomous nervous system to heart-rate profile during exercise.	Heart rate response to recovery post exercise (20 sec)	RNF220
1	rs272564	1	27798624	Eppinga RN	Identification of genomic loci associated with resting heart rate and shared genetic predictors with all-cause mortality.	Resting heart rate	RNF220
1	rs272564	1	29769521	Ramirez J	Thirty loci identified for heart rate response to exercise and recovery implicate autonomic nervous system.	Heart rate response to exercise	RNF220
1	rs272564	1	29769521	Ramirez J	Thirty loci identified for heart rate response to exercise and recovery implicate autonomic nervous system.	Heart rate response to exercise	RNF220
1	rs272564	1	29769521	Ramirez J	Thirty loci identified for heart rate response to exercise and recovery implicate autonomic nervous system.	Heart rate response to recovery post exercise	RNF220
1	rs272564	1	29769521	Ramirez J	Thirty loci identified for heart rate response to exercise and recovery implicate autonomic nervous system.	Resting heart rate	RNF220
1	rs272564	1	29497042	Verweij N	Genetic study links components of the autonomous nervous system to heart-rate profile during exercise.	Heart rate increase in response to exercise	RNF220
1	rs272564	1	29497042	Verweij N	Genetic study links components of the autonomous nervous system to heart-rate profile during exercise.	Heart rate response to recovery post exercise (30 sec)	RNF220
1	rs272564	1	29497042	Verweij N	Genetic study links components of the autonomous nervous system to heart-rate profile during exercise.	Heart rate response to recovery post exercise (40 sec)	RNF220
1	rs272564	1	29497042	Verweij N	Genetic study links components of the autonomous nervous system to heart-rate profile during exercise.	Heart rate response to recovery post exercise (50 sec)	RNF220
2	rs1938450	1	29403010	Kanai M	Genetic analysis of quantitative traits in the Japanese population links cell types to complex human diseases.	Mean corpuscular volume	GADD45A
2	rs1938450	1	27863252	Astle WJ	The Allelic Landscape of Human Blood Cell Trait Variation and Links to Common Complex Disease.	Mean corpuscular hemoglobin	GADD45A - GNG12
2	rs1938450	1	27863252	Astle WJ	The Allelic Landscape of Human Blood Cell Trait Variation and Links to Common Complex Disease.	Mean corpuscular volume	GADD45A - GNG12
2	rs1938450	1	30595370	Kichaev G	Leveraging Polygenic Functional Enrichment to Improve GWAS Power.	Red cell distribution width	GNG12
2	rs1938450	1	30595370	Kichaev G	Leveraging Polygenic Functional Enrichment to Improve GWAS Power.	Mean corpuscular hemoglobin	GNG12
2	rs1938450	1	30595370	Kichaev G	Leveraging Polygenic Functional Enrichment to Improve GWAS Power.	Lung function (FVC)	GNG12
2	rs1938450	1	29942085	Nagel M	Meta-analysis of genome-wide association studies for neuroticism in 449,484 individuals identifies novel genetic loci and pathways.	Depressed affect	GNG12-AS1
2	rs1938450	1	29500382	Nagel M	Item-level analyses reveal genetic heterogeneity in neuroticism.	Feeling fed-up	GNG12-AS1
3	rs11162906	1	29356057	Du Z	Genetic risk of prostate cancer in Ugandan men.	Prostate cancer	AC099671.1
3	rs11162906	1	23251661	Comuzzie AG	Novel genetic loci identified for the pathophysiology of childhood obesity in the Hispanic population.	Obesity-related traits	AC099671.1
4	rs390923	1	29304378	Medina-Gomez C	Life-Course Genome-wide Association Study Meta-analysis of Total Body BMD and Assessment of Age-Specific Effects.	Total body bone mineral density	CSF1 - AHCYL1
4	rs390923	1	29304378	Medina-Gomez C	Life-Course Genome-wide Association Study Meta-analysis of Total Body BMD and Assessment of Age-Specific Effects.	Total body bone mineral density (age over 60)	CSF1 - AHCYL1
4	rs390923	1	30595370	Kichaev G	Leveraging Polygenic Functional Enrichment to Improve GWAS Power.	Heel bone mineral density	CSF1 - AHCYL1
4	rs390923	1	29304378	Medina-Gomez C	Life-Course Genome-wide Association Study Meta-analysis of Total Body BMD and Assessment of Age-Specific Effects.	Total body bone mineral density	CSF1 - AHCYL1
4	rs390923	1	30643251	Liu M	Association studies of up to 1.2 million individuals yield new insights into the genetic etiology of tobacco and alcohol use.	Smoking initiation (ever regular vs never regular) (MTAG)	CSF1 - AHCYL1
4	rs390923	1	30038396	Lee JJ	Gene discovery and polygenic prediction from a genome-wide association study of educational attainment in 1.1 million individuals.	Educational attainment (years of education)	AHCYL1
4	rs390923	1	30038396	Lee JJ	Gene discovery and polygenic prediction from a genome-wide association study of educational attainment in 1.1 million individuals.	Educational attainment (MTAG)	AHCYL1
4	rs390923	1	30038396	Lee JJ	Gene discovery and polygenic prediction from a genome-wide association study of educational attainment in 1.1 million individuals.	Highest math class taken (MTAG)	AHCYL1
4	rs390923	1	30038396	Lee JJ	Gene discovery and polygenic prediction from a genome-wide association study of educational attainment in 1.1 million individuals.	Self-reported math ability	AHCYL1
4	rs390923	1	30038396	Lee JJ	Gene discovery and polygenic prediction from a genome-wide association study of educational attainment in 1.1 million individuals.	Self-reported math ability (MTAG)	AHCYL1
4	rs390923	1	30595370	Kichaev G	Leveraging Polygenic Functional Enrichment to Improve GWAS Power.	Educational attainment (years of education)	AHCYL1
4	rs390923	1	30038396	Lee JJ	Gene discovery and polygenic prediction from a genome-wide association study of educational attainment in 1.1 million individuals.	Educational attainment (years of education)	STRIP1
4	rs390923	1	30038396	Lee JJ	Gene discovery and polygenic prediction from a genome-wide association study of educational attainment in 1.1 million individuals.	Cognitive performance (MTAG)	STRIP1
4	rs390923	1	24816252	Shin SY	An atlas of genetic influences on human blood metabolites.	Blood metabolite levels	STRIP1 - LINC01397
5	rs6692560	1	24009623	Jiang J	Genome-wide association study for biomarker identification of Rapamycin and Everolimus using a lymphoblastoid cell line system.	Response to mTOR inhibitor (rapamycin)	RGS4 - RGS5
6	rs17713879	2	29782485	Rueger S	Evaluation and application of summary statistic imputation to discover new height-associated loci.	Height	SH3YL1
6	rs17713879	2	30275531	Klarin D	Genetics of blood lipids among ~300,000 multi-ethnic participants of the Million Veteran Program.	HDL cholesterol	SH3YL1
6	rs17713879	2	28240269	Suhre K	Connecting genetic risk to disease end points through the human blood plasma proteome.	Blood protein levels	SH3YL1
6	rs17713879	2	30643251	Liu M	Association studies of up to 1.2 million individuals yield new insights into the genetic etiology of tobacco and alcohol use.	Smoking initiation (ever regular vs never regular)	ACP1, SH3YL1
6	rs17713879	2	30072576	Emilsson V	Co-regulatory networks of human serum proteins link genetics to disease.	Blood protein levels	ACP1
6	rs17713879	2	30643251	Liu M	Association studies of up to 1.2 million individuals yield new insights into the genetic etiology of tobacco and alcohol use.	Smoking initiation (ever regular vs never regular) (MTAG)	ACP1
6	rs17713879	2	28240269	Suhre K	Connecting genetic risk to disease end points through the human blood plasma proteome.	Blood protein levels	ACP1
6	rs17713879	2	29875488	Sun BB	Genomic atlas of the human plasma proteome.	Blood protein levels	ACP1
6	rs17713879	2	28031287	Sasayama D	Genome-wide quantitative trait loci mapping of the human cerebrospinal fluid proteome.	Cerebrospinal fluid biomarker levels	ALKAL2
6	rs17713879	2	27020472	Fan Q	Meta-analysis of gene-environment-wide association scans accounting for education level identifies additional loci for refractive error.	Spherical equivalent (joint analysis main effects and education interaction)	AC079779.2, ALKAL2
6	rs17713879	2	27020472	Fan Q	Meta-analysis of gene-environment-wide association scans accounting for education level identifies additional loci for refractive error.	Spherical equivalent (joint analysis main effects and education interaction)	AC079779.2, ALKAL2
6	rs17713879	2	30643258	Karlsson Linner R	Genome-wide association analyses of risk tolerance and risky behaviors in over 1 million individuals identify hundreds of loci and shared genetic influences.	Adventurousness	AC079779.2, ALKAL2
6	rs17713879	2	30595370	Kichaev G	Leveraging Polygenic Functional Enrichment to Improve GWAS Power.	Body mass index	AC079779.2
6	rs17713879	2	29875488	Sun BB	Genomic atlas of the human plasma proteome.	Blood protein levels	AC079779.2
6	rs17713879	2	29808027	Tedja MS	Genome-wide association meta-analysis highlights light-induced signaling as a driver for refractive error.	Spherical equivalent or myopia (age of diagnosis)	AC079779.2
6	rs17713879	2	29875488	Sun BB	Genomic atlas of the human plasma proteome.	Blood protein levels	AC079779.3
7	rs3136302	2	30595370	Kichaev G	Leveraging Polygenic Functional Enrichment to Improve GWAS Power.	Age at menopause	MSH6
7	rs3136302	2	30595370	Kichaev G	Leveraging Polygenic Functional Enrichment to Improve GWAS Power.	Menarche (age at onset)	MSH6
7	rs3136302	2	30643258	Karlsson Linner R	Genome-wide association analyses of risk tolerance and risky behaviors in over 1 million individuals identify hundreds of loci and shared genetic influences.	General risk tolerance (MTAG)	MSH6, FBXO11
7	rs3136302	2	26414677	Day FR	Large-scale genomic analyses link reproductive aging to hypothalamic signaling, breast cancer susceptibility and BRCA1-mediated DNA repair.	Menopause (age at onset)	MSH6, FBXO11
7	rs3136302	2	30598549	Morris JA	An atlas of genetic influences on osteoporosis in humans and mice.	Heel bone mineral density	MSH6, FBXO11
7	rs3136302	2	30595370	Kichaev G	Leveraging Polygenic Functional Enrichment to Improve GWAS Power.	Heel bone mineral density	MSH6, FBXO11
7	rs3136302	2	30643251	Liu M	Association studies of up to 1.2 million individuals yield new insights into the genetic etiology of tobacco and alcohol use.	Smoking initiation (ever regular vs never regular) (MTAG)	FBXO11
7	rs3136302	2	30920136	Stapleton CP	The impact of donor and recipient common clinical and genetic variation on estimated glomerular filtration rate in a European renal transplant population.	Estimated glomerular filtration rate after 5 years in renal transplantation (recipient effect)	AC092650.1
7	rs3136302	2	30696823	Jones SE	Genome-wide association analyses of chronotype in 697,828 individuals provides insights into circadian rhythms.	Chronotype	AC092650.1
7	rs3136302	2	30535121	Gao XR	Genome-wide association analyses identify 139 loci associated with macular thickness in the UK Biobank cohort.	Macular thickness	AC092650.1
7	rs3136302	2	30595370	Kichaev G	Leveraging Polygenic Functional Enrichment to Improve GWAS Power.	Mean corpuscular hemoglobin	AC092650.1
7	rs3136302	2	28898252	Wheeler E	Impact of common genetic determinants of Hemoglobin A1c on type 2 diabetes risk and diagnosis in ancestrally diverse populations: A transethnic genome-wide meta-analysis.	Glycated hemoglobin levels	AC092650.1
7	rs3136302	2	30643251	Liu M	Association studies of up to 1.2 million individuals yield new insights into the genetic etiology of tobacco and alcohol use.	Alcohol consumption (drinks per week) (MTAG)	AC092650.1
7	rs3136302	2	30696823	Jones SE	Genome-wide association analyses of chronotype in 697,828 individuals provides insights into circadian rhythms.	Chronotype	STON1, STON1-GTF2A1L
8	rs6735304	2	30696823	Jones SE	Genome-wide association analyses of chronotype in 697,828 individuals provides insights into circadian rhythms.	Chronotype	AC016738.2, NPAS2
8	rs6735304	2	30595370	Kichaev G	Leveraging Polygenic Functional Enrichment to Improve GWAS Power.	White blood cell count	NPAS2
8	rs6735304	2	30054594	MacGregor S	Genome-wide association study of intraocular pressure uncovers new pathways to glaucoma.	Intraocular pressure	NPAS2
8	rs6735304	2	30289880	Qi G	Heritability informed power optimization (HIPO) leads to enhanced detection of genetic associations across multiple traits.	Lipid traits (pleiotropy) (HIPO component 2)	TBC1D8
8	rs6735304	2	29785010	Khawaja AP	Genome-wide analyses identify 68 new loci associated with intraocular pressure and improve risk prediction for primary open-angle glaucoma.	Intraocular pressure	TBC1D8
8	rs6735304	2	20548944	Hsu YH	An integration of genome-wide association study and gene expression profiling to prioritize the discovery of novel susceptibility Loci for osteoporosis-related traits.	Osteoporosis-related phenotypes	TBC1D8
8	rs6735304	2	29130521	Christopher L	A variant in PPP4R3A protects against alzheimer-related metabolic decline.	Decline in glucose metabolism in posterior cingulate cortex	TBC1D8
9	rs12470661	2	24962563	Rubicz R	Genome-wide genetic and transcriptomic investigation of variation in antibody response to dietary antigens.	Food antigen IgG levels	ARMC9
9	rs12470661	2	23955597	Chubb D	Common variation at 3q26.2, 6p21.33, 17p11.2 and 22q13.1 influences multiple myeloma risk.	Multiple myeloma	ARMC9
11	rs10008976	4	22179738	Lai HM	Gout and type 2 diabetes have a mutual inter-dependent effect on genetic risk factors and higher incidences.	Gout	PPARGC1A - DHX15
11	rs10008976	4	27798624	Eppinga RN	Identification of genomic loci associated with resting heart rate and shared genetic predictors with all-cause mortality.	Resting heart rate	PPARGC1A - DHX15
13	rs3775221	4	23793025	Anttila V	Genome-wide meta-analysis identifies new susceptibility loci for migraine.	Migraine - clinic-based	MAPK10
13	rs3775221	4	29617998	Gao XR	Genome-Wide Association Analyses Identify New Loci Influencing Intraocular Pressure.	Intraocular pressure	AC093827.5
13	rs3775221	4	29617998	Gao XR	Genome-Wide Association Analyses Identify New Loci Influencing Intraocular Pressure.	Intraocular pressure	AC093827.5
13	rs3775221	4	27863252	Astle WJ	The Allelic Landscape of Human Blood Cell Trait Variation and Links to Common Complex Disease.	Basophil percentage of white cells	AFF1
13	rs3775221	4	22291604	Okada Y	A genome-wide association study identified AFF1 as a susceptibility locus for systemic lupus eyrthematosus in Japanese.	Systemic lupus erythematosus	AFF1
13	rs3775221	4	27863252	Astle WJ	The Allelic Landscape of Human Blood Cell Trait Variation and Links to Common Complex Disease.	Mean corpuscular hemoglobin	AFF1
13	rs3775221	4	30598549	Morris JA	An atlas of genetic influences on osteoporosis in humans and mice.	Heel bone mineral density	AFF1
13	rs3775221	4	30595370	Kichaev G	Leveraging Polygenic Functional Enrichment to Improve GWAS Power.	Heel bone mineral density	AFF1
13	rs3775221	4	30595370	Kichaev G	Leveraging Polygenic Functional Enrichment to Improve GWAS Power.	Mean corpuscular hemoglobin	AFF1
13	rs3775221	4	28334899	Spracklen CN	Association analyses of East Asian individuals and trans-ancestry analyses with European individuals reveal new loci associated with cholesterol and triglyceride levels.	HDL cholesterol levels	AFF1
13	rs3775221	4	28334899	Spracklen CN	Association analyses of East Asian individuals and trans-ancestry analyses with European individuals reveal new loci associated with cholesterol and triglyceride levels.	HDL cholesterol levels	AFF1
13	rs3775221	4	29403010	Kanai M	Genetic analysis of quantitative traits in the Japanese population links cell types to complex human diseases.	Total bilirubin levels	AFF1
13	rs3775221	4	27863252	Astle WJ	The Allelic Landscape of Human Blood Cell Trait Variation and Links to Common Complex Disease.	Mean platelet volume	AFF1
13	rs3775221	4	30670697	Kilpelainen TO	Multi-ancestry study of blood lipid levels identifies four loci interacting with physical activity.	Triglycerides x physical activity interaction (2df test)	AFF1
13	rs3775221	4	28334899	Spracklen CN	Association analyses of East Asian individuals and trans-ancestry analyses with European individuals reveal new loci associated with cholesterol and triglyceride levels.	Triglyceride levels	AFF1
13	rs3775221	4	27863252	Astle WJ	The Allelic Landscape of Human Blood Cell Trait Variation and Links to Common Complex Disease.	Basophil percentage of white cells	AFF1
13	rs3775221	4	25961943	Surakka I	The impact of low-frequency and rare variants on lipid levels.	Triglycerides	AFF1
13	rs3775221	4	29507422	Hoffmann TJ	A large electronic-health-record-based genome-wide study of serum lipids.	High density lipoprotein cholesterol levels	AFF1
13	rs3775221	4	29507422	Hoffmann TJ	A large electronic-health-record-based genome-wide study of serum lipids.	High density lipoprotein cholesterol levels	AFF1
13	rs3775221	4	29507422	Hoffmann TJ	A large electronic-health-record-based genome-wide study of serum lipids.	Triglycerides	AFF1
13	rs3775221	4	29507422	Hoffmann TJ	A large electronic-health-record-based genome-wide study of serum lipids.	Triglycerides	AFF1
13	rs3775221	4	27863252	Astle WJ	The Allelic Landscape of Human Blood Cell Trait Variation and Links to Common Complex Disease.	Hematocrit	AFF1
13	rs3775221	4	20864672	Waterworth DM	Genetic variants influencing circulating lipid levels and risk of coronary artery disease.	Triglycerides	AFF1
13	rs3775221	4	20686565	Teslovich TM	Biological, clinical and population relevance of 95 loci for blood lipids.	Triglycerides	AFF1
13	rs3775221	4	24097068	Willer CJ	Discovery and refinement of loci associated with lipid levels.	Triglycerides	AFF1
13	rs3775221	4	27863252	Astle WJ	The Allelic Landscape of Human Blood Cell Trait Variation and Links to Common Complex Disease.	Hemoglobin concentration	AFF1
13	rs3775221	4	30595370	Kichaev G	Leveraging Polygenic Functional Enrichment to Improve GWAS Power.	Lung function (FVC)	AFF1
13	rs3775221	4	29507422	Hoffmann TJ	A large electronic-health-record-based genome-wide study of serum lipids.	High density lipoprotein cholesterol levels	AFF1
13	rs3775221	4	29507422	Hoffmann TJ	A large electronic-health-record-based genome-wide study of serum lipids.	High density lipoprotein cholesterol levels	AFF1
13	rs3775221	4	29507422	Hoffmann TJ	A large electronic-health-record-based genome-wide study of serum lipids.	Triglycerides	AFF1
13	rs3775221	4	29507422	Hoffmann TJ	A large electronic-health-record-based genome-wide study of serum lipids.	Triglycerides	AFF1
13	rs3775221	4	29403010	Kanai M	Genetic analysis of quantitative traits in the Japanese population links cell types to complex human diseases.	Hematocrit	AFF1
13	rs3775221	4	27863252	Astle WJ	The Allelic Landscape of Human Blood Cell Trait Variation and Links to Common Complex Disease.	Red blood cell count	AFF1
13	rs3775221	4	28334899	Spracklen CN	Association analyses of East Asian individuals and trans-ancestry analyses with European individuals reveal new loci associated with cholesterol and triglyceride levels.	Triglyceride levels	AFF1
13	rs3775221	4	29403010	Kanai M	Genetic analysis of quantitative traits in the Japanese population links cell types to complex human diseases.	Hemoglobin	AFF1
13	rs3775221	4	29403010	Kanai M	Genetic analysis of quantitative traits in the Japanese population links cell types to complex human diseases.	White blood cell count (basophil)	AFF1
13	rs3775221	4	30275531	Klarin D	Genetics of blood lipids among ~300,000 multi-ethnic participants of the Million Veteran Program.	Triglycerides	AFF1
13	rs3775221	4	30595370	Kichaev G	Leveraging Polygenic Functional Enrichment to Improve GWAS Power.	Red blood cell count	AFF1
13	rs3775221	4	27515689	Kerns SL	Meta-analysis of Genome Wide Association Studies Identifies Genetic Markers of Late Toxicity Following Radiotherapy for Prostate Cancer.	Response to radiotherapy in prostate cancer (toxicity, urinary frequency)	AFF1 - KLHL8
13	rs3775221	4	29771307	Aponte JL	Assessment of rosacea symptom severity by genome-wide association study and expression analysis highlights immuno-inflammatory and skin pigmentation genes.	Rosacea symptom severity	KLHL8
16	rs56098119	6	29403010	Kanai M	Genetic analysis of quantitative traits in the Japanese population links cell types to complex human diseases.	Creatinine levels	RRAGD
16	rs56098119	6	29403010	Kanai M	Genetic analysis of quantitative traits in the Japanese population links cell types to complex human diseases.	Glomerular filtration rate	RRAGD
16	rs56098119	6	25827505	Swaminathan S	Characteristics of Bipolar I patients grouped by externalizing disorders.	Bipolar disorder	ANKRD6, LYRM2
16	rs56098119	6	30595370	Kichaev G	Leveraging Polygenic Functional Enrichment to Improve GWAS Power.	Red cell distribution width	LYRM2, ANKRD6
16	rs56098119	6	29212778	van der Harst P	Identification of 64 Novel Genetic Loci Provides an Expanded View on the Genetic Architecture of Coronary Artery Disease.	Coronary artery disease	LYRM2
16	rs56098119	6	30595370	Kichaev G	Leveraging Polygenic Functional Enrichment to Improve GWAS Power.	Mean corpuscular hemoglobin	LYRM2
16	rs56098119	6	27958378	Floyd JS	Large-scale pharmacogenomic study of sulfonylureas and the QT, JT and QRS intervals: CHARGE Pharmacogenomics Working Group.	QRS interval (sulfonylurea treatment interaction)	MDN1
16	rs56098119	6	30595370	Kichaev G	Leveraging Polygenic Functional Enrichment to Improve GWAS Power.	Eosinophil counts	MDN1
18	rs180271	7	22424883	Imboden M	Genome-wide association study of lung function decline in adults with and without asthma.	Pulmonary function decline	GNGT1
18	rs180271	7	29497042	Verweij N	Genetic study links components of the autonomous nervous system to heart-rate profile during exercise.	Heart rate response to recovery post exercise (10 sec)	AC002076.2 - GNG11
18	rs180271	7	29497042	Verweij N	Genetic study links components of the autonomous nervous system to heart-rate profile during exercise.	Heart rate response to recovery post exercise (20 sec)	AC002076.2 - GNG11
18	rs180271	7	29497042	Verweij N	Genetic study links components of the autonomous nervous system to heart-rate profile during exercise.	Heart rate response to recovery post exercise (30 sec)	AC002076.2 - GNG11
18	rs180271	7	23583979	den Hoed M	Identification of heart rate-associated loci and their effects on cardiac conduction and rhythm disorders.	Heart rate	AC002076.2 - GNG11
18	rs180271	7	27798624	Eppinga RN	Identification of genomic loci associated with resting heart rate and shared genetic predictors with all-cause mortality.	Resting heart rate	AC002076.2 - GNG11
18	rs180271	7	29769521	Ramirez J	Thirty loci identified for heart rate response to exercise and recovery implicate autonomic nervous system.	Resting heart rate	AC002076.2 - GNG11
18	rs180271	7	28613276	Nolte IM	Genetic loci associated with heart rate variability and their effects on cardiac disease risk.	Heart rate variability traits (RMSSD)	AC002076.2 - GNG11
18	rs180271	7	28613276	Nolte IM	Genetic loci associated with heart rate variability and their effects on cardiac disease risk.	Heart rate variability traits (RMSSD)	AC002076.2 - GNG11
18	rs180271	7	29497042	Verweij N	Genetic study links components of the autonomous nervous system to heart-rate profile during exercise.	Heart rate response to recovery post exercise (40 sec)	AC002076.2 - GNG11
18	rs180271	7	29497042	Verweij N	Genetic study links components of the autonomous nervous system to heart-rate profile during exercise.	Heart rate response to recovery post exercise (50 sec)	AC002076.2 - GNG11
18	rs180271	7	28613276	Nolte IM	Genetic loci associated with heart rate variability and their effects on cardiac disease risk.	Heart rate variability traits (SDNN)	GNG11
18	rs180271	7	28613276	Nolte IM	Genetic loci associated with heart rate variability and their effects on cardiac disease risk.	Heart rate variability traits (SDNN)	GNG11
18	rs180271	7	28613276	Nolte IM	Genetic loci associated with heart rate variability and their effects on cardiac disease risk.	Heart rate variability traits (pvRSA/HF)	GNG11
18	rs180271	7	28613276	Nolte IM	Genetic loci associated with heart rate variability and their effects on cardiac disease risk.	Heart rate variability traits (pvRSA/HF)	GNG11
19	rs17639782	7	30038396	Lee JJ	Gene discovery and polygenic prediction from a genome-wide association study of educational attainment in 1.1 million individuals.	Highest math class taken (MTAG)	LHFPL3-AS2 - AC007384.1
19	rs17639782	7	30038396	Lee JJ	Gene discovery and polygenic prediction from a genome-wide association study of educational attainment in 1.1 million individuals.	Self-reported math ability	LHFPL3-AS2 - AC007384.1
19	rs17639782	7	30038396	Lee JJ	Gene discovery and polygenic prediction from a genome-wide association study of educational attainment in 1.1 million individuals.	Self-reported math ability (MTAG)	LHFPL3-AS2 - AC007384.1
19	rs17639782	7	30595370	Kichaev G	Leveraging Polygenic Functional Enrichment to Improve GWAS Power.	Lung function (FVC)	AC007384.1, LINC01004
19	rs17639782	7	29844566	Davies G	Study of 300,486 individuals identifies 148 independent genetic loci influencing general cognitive function.	General cognitive ability	AC007384.1, LINC01004
19	rs17639782	7	30038396	Lee JJ	Gene discovery and polygenic prediction from a genome-wide association study of educational attainment in 1.1 million individuals.	Highest math class taken	AC007384.1, LINC01004
19	rs17639782	7	30643251	Liu M	Association studies of up to 1.2 million individuals yield new insights into the genetic etiology of tobacco and alcohol use.	Smoking cessation (MTAG)	SRPK2
19	rs17639782	7	30595370	Kichaev G	Leveraging Polygenic Functional Enrichment to Improve GWAS Power.	Sunburns	SRPK2
19	rs17639782	7	28540026	Anney RJL	Meta-analysis of GWAS of over 16,000 individuals with autism spectrum disorder highlights a novel locus at 10q24.32 and a significant overlap with schizophrenia.	Autism spectrum disorder or schizophrenia	SRPK2
19	rs17639782	7	29844566	Davies G	Study of 300,486 individuals identifies 148 independent genetic loci influencing general cognitive function.	General cognitive ability	SRPK2
20	rs1906214	8	30595370	Kichaev G	Leveraging Polygenic Functional Enrichment to Improve GWAS Power.	Balding type 1	RPL35AP19 - HAS2
21	rs10868842	9	22344221	Okada Y	Common variants at CDKAL1 and KLF9 are associated with body mass index in east Asian populations.	Body mass index (SNP x SNP interaction)	SMC5 - KLF9
21	rs10868842	9	24861553	Wen W	Meta-analysis of genome-wide association studies in East Asian-ancestry populations identifies four new loci for body mass index.	Body mass index	SMC5 - KLF9
21	rs10868842	9	29326435	Hill WD	A combined analysis of genetically correlated traits identifies 187 loci and a role for neurogenesis and myelination in intelligence.	Intelligence (MTAG)	SMC5 - KLF9
21	rs10868842	9	30048462	Kim SK	Identification of 613 new loci associated with heel bone mineral density and a polygenic risk score for bone mineral density, osteoporosis and fracture.	Heel bone mineral density	KLF9
21	rs10868842	9	30598549	Morris JA	An atlas of genetic influences on osteoporosis in humans and mice.	Heel bone mineral density	KLF9
21	rs10868842	9	30595370	Kichaev G	Leveraging Polygenic Functional Enrichment to Improve GWAS Power.	Heel bone mineral density	KLF9
21	rs10868842	9	30595370	Kichaev G	Leveraging Polygenic Functional Enrichment to Improve GWAS Power.	White blood cell count	KLF9 - TRPM3
21	rs10868842	9	27863252	Astle WJ	The Allelic Landscape of Human Blood Cell Trait Variation and Links to Common Complex Disease.	Mean platelet volume	KLF9 - TRPM3
22	rs12768143	10	23996088	Migliorini G	Variation at 10p12.2 and 10p14 influences risk of childhood B-cell acute lymphoblastic leukemia and phenotype.	Acute lymphoblastic leukemia (B-cell precursor)	PIP4K2A
22	rs12768143	10	29632299	Vijayakrishnan J	Genome-wide association study identifies susceptibility loci for B-cell childhood acute lymphoblastic leukemia.	Acute lymphoblastic leukemia in childhood (B cell precursor)	PIP4K2A
22	rs12768143	10	29348612	Wiemels JL	GWAS in childhood acute lymphoblastic leukemia reveals novel genetic associations at chromosomes 17q12 and 8q24.21.	Acute lymphoblastic leukemia (childhood)	PIP4K2A
22	rs12768143	10	23251661	Comuzzie AG	Novel genetic loci identified for the pathophysiology of childhood obesity in the Hispanic population.	Obesity-related traits	PIP4K2A
22	10:22861490:A:C	10	29059683	Michailidou K	Association analysis identifies 65 new breast cancer risk loci.	Breast cancer	PIP4K2A
23	rs10500747	11	28928442	Tian C	Genome-wide association and HLA region fine-mapping studies identify susceptibility loci for multiple common infections.	Urinary tract infection frequency	AC131935.2 - AC131935.1
23	rs10500747	11	30595370	Kichaev G	Leveraging Polygenic Functional Enrichment to Improve GWAS Power.	Body mass index	AC131935.1 - MIR8070
24	rs11226029	11	22993228	Williams FM	Novel genetic variants associated with lumbar disc degeneration in northern Europeans: a meta-analysis of 4600 subjects.	Disc degeneration (lumbar)	DYNC2H1 - AP002989.1
24	rs11226029	11	22993228	Williams FM	Novel genetic variants associated with lumbar disc degeneration in northern Europeans: a meta-analysis of 4600 subjects.	Disc degeneration (lumbar)	DYNC2H1 - AP002989.1
24	rs11226029	11	22993228	Williams FM	Novel genetic variants associated with lumbar disc degeneration in northern Europeans: a meta-analysis of 4600 subjects.	Disc degeneration (lumbar)	DYNC2H1 - AP002989.1
24	rs11226029	11	22993228	Williams FM	Novel genetic variants associated with lumbar disc degeneration in northern Europeans: a meta-analysis of 4600 subjects.	Disc degeneration (lumbar)	DYNC2H1 - AP002989.1
24	rs11226029	11	21507922	Ramsuran V	Duffy-null-associated low neutrophil counts influence HIV-1 susceptibility in high-risk South African black women.	Neutrophil count	AP002989.1
24	rs11226029	11	21378988	Coronary Artery Disease (C4D) Genetics Consortium	A genome-wide association study in Europeans and South Asians identifies five new loci for coronary artery disease.	Coronary heart disease	AP002989.1
24	rs11226029	11	29212778	van der Harst P	Identification of 64 Novel Genetic Loci Provides an Expanded View on the Genetic Architecture of Coronary Artery Disease.	Coronary artery disease	AP002989.1
24	rs11226029	11	29212778	van der Harst P	Identification of 64 Novel Genetic Loci Provides an Expanded View on the Genetic Architecture of Coronary Artery Disease.	Coronary artery disease	AP002989.1
24	rs11226029	11	26343387	Nikpay M	A comprehensive 1,000 Genomes-based genome-wide association meta-analysis of coronary artery disease.	Myocardial infarction	AP002989.1
24	rs11226029	11	26343387	Nikpay M	A comprehensive 1,000 Genomes-based genome-wide association meta-analysis of coronary artery disease.	Coronary artery disease	AP002989.1
24	rs11226029	11	29212778	van der Harst P	Identification of 64 Novel Genetic Loci Provides an Expanded View on the Genetic Architecture of Coronary Artery Disease.	Coronary artery disease	AP002989.1
24	rs11226029	11	30940143	Zhu Z	Genetic overlap of chronic obstructive pulmonary disease and cardiovascular disease-related traits: a large-scale genome-wide cross-trait analysis.	Chronic obstructive pulmonary disease or coronary artery disease (pleiotropy)	AP002989.1
24	rs11226029	11	28714975	Nelson CP	Association analyses based on false discovery rate implicate new loci for coronary artery disease.	Coronary artery disease (myocardial infarction, percutaneous transluminal coronary angioplasty, coronary artery bypass grafting, angina or chromic ischemic heart disease)	AP002989.1
26	rs1343676	12	30275531	Klarin D	Genetics of blood lipids among ~300,000 multi-ethnic participants of the Million Veteran Program.	HDL cholesterol	AC087311.2 - SYT10
26	rs1343676	12	30679814	van Setten J	Genome-wide association meta-analysis of 30,000 samples identifies seven novel loci for quantitative ECG traits.	RR interval (heart rate)	SYT10
26	rs1343676	12	29769521	Ramirez J	Thirty loci identified for heart rate response to exercise and recovery implicate autonomic nervous system.	Heart rate response to exercise	SYT10
26	rs1343676	12	29769521	Ramirez J	Thirty loci identified for heart rate response to exercise and recovery implicate autonomic nervous system.	Resting heart rate	SYT10
26	rs1343676	12	27089181	Okbay A	Genetic variants associated with subjective well-being, depressive symptoms, and neuroticism identified through genome-wide analyses.	Life satisfaction	SYT10
26	rs1343676	12	30696823	Jones SE	Genome-wide association analyses of chronotype in 697,828 individuals provides insights into circadian rhythms.	Morning person	SYT10
26	rs1343676	12	23583979	den Hoed M	Identification of heart rate-associated loci and their effects on cardiac conduction and rhythm disorders.	Heart rate	SYT10
26	rs1343676	12	28613276	Nolte IM	Genetic loci associated with heart rate variability and their effects on cardiac disease risk.	Heart rate variability traits (RMSSD)	SYT10
26	rs1343676	12	28613276	Nolte IM	Genetic loci associated with heart rate variability and their effects on cardiac disease risk.	Heart rate variability traits (RMSSD)	SYT10
26	rs1343676	12	29497042	Verweij N	Genetic study links components of the autonomous nervous system to heart-rate profile during exercise.	Heart rate increase in response to exercise	SYT10 - AC016956.1
26	rs1343676	12	29497042	Verweij N	Genetic study links components of the autonomous nervous system to heart-rate profile during exercise.	Heart rate response to recovery post exercise (10 sec)	SYT10 - AC016956.1
26	rs1343676	12	29497042	Verweij N	Genetic study links components of the autonomous nervous system to heart-rate profile during exercise.	Heart rate response to recovery post exercise (20 sec)	SYT10 - AC016956.1
26	rs1343676	12	29497042	Verweij N	Genetic study links components of the autonomous nervous system to heart-rate profile during exercise.	Heart rate response to recovery post exercise (30 sec)	SYT10 - AC016956.1
26	rs1343676	12	29497042	Verweij N	Genetic study links components of the autonomous nervous system to heart-rate profile during exercise.	Heart rate response to recovery post exercise (40 sec)	SYT10 - AC016956.1
26	rs1343676	12	29497042	Verweij N	Genetic study links components of the autonomous nervous system to heart-rate profile during exercise.	Heart rate response to recovery post exercise (50 sec)	SYT10 - AC016956.1
26	rs1343676	12	28613276	Nolte IM	Genetic loci associated with heart rate variability and their effects on cardiac disease risk.	Heart rate variability traits (pvRSA/HF)	SYT10 - AC016956.1
26	rs1343676	12	28613276	Nolte IM	Genetic loci associated with heart rate variability and their effects on cardiac disease risk.	Heart rate variability traits (pvRSA/HF)	SYT10 - AC016956.1
26	rs1343676	12	29769521	Ramirez J	Thirty loci identified for heart rate response to exercise and recovery implicate autonomic nervous system.	Heart rate response to recovery post exercise	SYT10 - AC016956.1
26	rs1343676	12	29769521	Ramirez J	Thirty loci identified for heart rate response to exercise and recovery implicate autonomic nervous system.	Heart rate response to recovery post exercise	SYT10 - AC016956.1
26	rs1343676	12	28613276	Nolte IM	Genetic loci associated with heart rate variability and their effects on cardiac disease risk.	Heart rate variability traits (SDNN)	AC016956.1 - RNU6-400P
26	rs1343676	12	28613276	Nolte IM	Genetic loci associated with heart rate variability and their effects on cardiac disease risk.	Heart rate variability traits (SDNN)	AC016956.1 - RNU6-400P
26	rs1343676	12	30696823	Jones SE	Genome-wide association analyses of chronotype in 697,828 individuals provides insights into circadian rhythms.	Morning person	AC016956.1 - RNU6-400P
26	rs1343676	12	27798624	Eppinga RN	Identification of genomic loci associated with resting heart rate and shared genetic predictors with all-cause mortality.	Resting heart rate	AC016956.1 - RNU6-400P
26	rs1343676	12	29769521	Ramirez J	Thirty loci identified for heart rate response to exercise and recovery implicate autonomic nervous system.	Heart rate response to exercise	AC016956.1 - RNU6-400P
26	rs1343676	12	29769521	Ramirez J	Thirty loci identified for heart rate response to exercise and recovery implicate autonomic nervous system.	Resting heart rate	AC016956.1 - RNU6-400P
26	rs1343676	12	29769521	Ramirez J	Thirty loci identified for heart rate response to exercise and recovery implicate autonomic nervous system.	Heart rate response to recovery post exercise	RNU6-400P - AC024153.1
26	rs1343676	12	29769521	Ramirez J	Thirty loci identified for heart rate response to exercise and recovery implicate autonomic nervous system.	Heart rate response to recovery post exercise	RNU6-400P - AC024153.1
26	rs1343676	12	29769521	Ramirez J	Thirty loci identified for heart rate response to exercise and recovery implicate autonomic nervous system.	Heart rate response to recovery post exercise	RNU6-400P - AC024153.1
26	rs1343676	12	30696823	Jones SE	Genome-wide association analyses of chronotype in 697,828 individuals provides insights into circadian rhythms.	Morning person	RNU6-400P - AC024153.1
26	rs1343676	12	29844566	Davies G	Study of 300,486 individuals identifies 148 independent genetic loci influencing general cognitive function.	Reaction time	AC024153.1 - RNU6-472P
26	rs1343676	12	30595370	Kichaev G	Leveraging Polygenic Functional Enrichment to Improve GWAS Power.	Morning person	AC024153.1 - RNU6-472P
26	rs1343676	12	30696823	Jones SE	Genome-wide association analyses of chronotype in 697,828 individuals provides insights into circadian rhythms.	Morning person	AC024153.1 - RNU6-472P
26	rs1343676	12	26835600	Hu Y	GWAS of 89,283 individuals identifies genetic variants associated with self-reporting of being a morning person.	Morning vs. evening chronotype	AC024153.1 - RNU6-472P
26	rs1343676	12	30696823	Jones SE	Genome-wide association analyses of chronotype in 697,828 individuals provides insights into circadian rhythms.	Morning person	AC024153.1 - RNU6-472P
26	rs1343676	12	30696823	Jones SE	Genome-wide association analyses of chronotype in 697,828 individuals provides insights into circadian rhythms.	Chronotype	AC024153.1 - RNU6-472P
26	rs1343676	12	26835600	Hu Y	GWAS of 89,283 individuals identifies genetic variants associated with self-reporting of being a morning person.	Morning vs. evening chronotype	RNU6-472P - RF00019
26	rs1343676	12	30696823	Jones SE	Genome-wide association analyses of chronotype in 697,828 individuals provides insights into circadian rhythms.	Morning person	RF00019 - AC046130.1
26	rs1343676	12	30696823	Jones SE	Genome-wide association analyses of chronotype in 697,828 individuals provides insights into circadian rhythms.	Morning person	AC046130.2 - AC140847.1
26	rs1343676	12	30696823	Jones SE	Genome-wide association analyses of chronotype in 697,828 individuals provides insights into circadian rhythms.	Morning person	AK6P1 - ZNF970P
26	rs1343676	12	29844566	Davies G	Study of 300,486 individuals identifies 148 independent genetic loci influencing general cognitive function.	Reaction time	AK6P1 - ZNF970P
27	rs7322054	13	30072576	Emilsson V	Co-regulatory networks of human serum proteins link genetics to disease.	Blood protein levels	LINC00547
27	rs7322054	13	30643251	Liu M	Association studies of up to 1.2 million individuals yield new insights into the genetic etiology of tobacco and alcohol use.	Smoking initiation (ever regular vs never regular)	POSTN
27	rs7322054	13	27089181	Okbay A	Genetic variants associated with subjective well-being, depressive symptoms, and neuroticism identified through genome-wide analyses.	Life satisfaction	POSTN - TRPC4
27	rs7322054	13	30643251	Liu M	Association studies of up to 1.2 million individuals yield new insights into the genetic etiology of tobacco and alcohol use.	Smoking initiation (ever regular vs never regular) (MTAG)	POSTN - TRPC4
27	rs7322054	13	25158072	Yu D	Cross-disorder genome-wide analyses suggest a complex genetic relationship between Tourette's syndrome and OCD.	Tourette's syndrome or obsessive-compulsive disorder	TRPC4
28	rs4337169	13	18839057	Lesch KP	Molecular genetics of adult ADHD: converging evidence from genome-wide association and extended pedigree linkage studies.	Attention deficit hyperactivity disorder	GPC6
28	rs4337169	13	26198764	Goes FS	Genome-wide association study of schizophrenia in Ashkenazi Jews.	Schizophrenia	GPC6
29	rs61972411	13	30598549	Morris JA	An atlas of genetic influences on osteoporosis in humans and mice.	Heel bone mineral density	CLYBL - ZIC5
29	rs61972411	13	30595370	Kichaev G	Leveraging Polygenic Functional Enrichment to Improve GWAS Power.	Heel bone mineral density	CLYBL - ZIC5
29	rs61972411	13	30048462	Kim SK	Identification of 613 new loci associated with heel bone mineral density and a polygenic risk score for bone mineral density, osteoporosis and fracture.	Heel bone mineral density	CLYBL - ZIC5
30	rs112500920	15	30595370	Kichaev G	Leveraging Polygenic Functional Enrichment to Improve GWAS Power.	Red blood cell count	LINC01583
30	rs112500920	15	29942086	Savage JE	Genome-wide association meta-analysis in 269,867 individuals identifies new genetic and functional links to intelligence.	Intelligence	EFL1
30	rs112500920	15	29844566	Davies G	Study of 300,486 individuals identifies 148 independent genetic loci influencing general cognitive function.	General cognitive ability	EFL1
30	rs112500920	15	29326435	Hill WD	A combined analysis of genetically correlated traits identifies 187 loci and a role for neurogenesis and myelination in intelligence.	Intelligence (MTAG)	EFL1
30	rs112500920	15	30038396	Lee JJ	Gene discovery and polygenic prediction from a genome-wide association study of educational attainment in 1.1 million individuals.	Cognitive performance	EFL1
30	rs112500920	15	29844566	Davies G	Study of 300,486 individuals identifies 148 independent genetic loci influencing general cognitive function.	General cognitive ability	CPEB1, CPEB1, AC245033.2, AC245033.1
30	rs112500920	15	27992416	Lane JM	Genome-wide association analyses of sleep disturbance traits identify new loci and highlight shared genetics with neuropsychiatric and metabolic traits.	Excessive daytime sleepiness	AC245033.2, AC245033.1, CPEB1, CPEB1
30	rs112500920	15	30038396	Lee JJ	Gene discovery and polygenic prediction from a genome-wide association study of educational attainment in 1.1 million individuals.	Cognitive performance (MTAG)	AP3B2
30	rs112500920	15	30038396	Lee JJ	Gene discovery and polygenic prediction from a genome-wide association study of educational attainment in 1.1 million individuals.	Educational attainment (MTAG)	AP3B2
30	rs112500920	15	30038396	Lee JJ	Gene discovery and polygenic prediction from a genome-wide association study of educational attainment in 1.1 million individuals.	Highest math class taken (MTAG)	AP3B2
30	rs112500920	15	29844566	Davies G	Study of 300,486 individuals identifies 148 independent genetic loci influencing general cognitive function.	General cognitive ability	ACTG1P17
30	rs112500920	15	29942086	Savage JE	Genome-wide association meta-analysis in 269,867 individuals identifies new genetic and functional links to intelligence.	Intelligence	ACTG1P17
31	rs116643984	15	23291589	Lu Y	Genome-wide association analyses identify multiple loci associated with central corneal thickness and keratoconus.	Corneal structure	CHSY1
31	rs116643984	15	29760442	Iglesias AI	Cross-ancestry genome-wide association analysis of corneal thickness strengthens link between complex and Mendelian eye diseases.	Central corneal thickness	CHSY1
32	rs1804193	17	28877031	Zhang G	Genetic Associations with Gestational Duration and Spontaneous Preterm Birth.	Preterm birth (maternal effect)	AC005703.2 - TEKT3
32	rs1804193	17	23166209	Smith JG	Impact of ancestry and common genetic variants on QT interval in African Americans.	QT interval	AC005703.2 - TEKT3
33	rs73937040	18	27577874	Evans DS	Fine-mapping, novel loci identification, and SNP association transferability in a genome-wide association study of QRS duration in African Americans.	QRS duration	MYL12A
33	rs73937040	18	27577874	Evans DS	Fine-mapping, novel loci identification, and SNP association transferability in a genome-wide association study of QRS duration in African Americans.	QRS duration	MYL12A
34	rs146827176	20	30595370	Kichaev G	Leveraging Polygenic Functional Enrichment to Improve GWAS Power.	Lung function (FEV1/FVC)	DLGAP4-AS1, MYL9

## Sheet: S TAble 4
Supplementary Table 2: 35 novel loci GTEx eQTL associations per tissue. "x" represents that the variant is an eQTL. The number of tissues a given variant has eQTL in is indicated on the right and the number of eQTLs per tissue on the bottom.
	Adipose Subcutaneous	Adipose Visceral Omentum	Adrenal Gland	Artery Aorta	Artery Coronary	Artery Tibial	Brain Anterior cingulate cortex BA24	Brain Caudate basal ganglia	Brain Cerebellar Hemisphere	Brain Cerebellum	Brain Cortex	Brain Frontal Cortex BA9	Brain Hippocampus	Brain Hypothalamus	Brain Nucleus accumbens basal ganglia	Brain Putamen basal ganglia	Brain - Spinal cord (cervical c-1)	Breast Mammary Tissue	Cells EBV.transformed lymphocytes	Cells Transformed fibroblasts	Colon Sigmoid	Colon Transverse	Esophagus Gastroesophageal Junction	Esophagus Mucosa	Esophagus Muscularis	Small Intestine Terminal Ileum	Stomach	Heart Atrial Appendage	Heart Left Ventricle	Kidney - Cortex	Liver	Lung	Muscle Skeletal	Nerve Tibial	Pancreas	Pituitary	Thyroid	Prostate	Skin Not Sun Exposed Suprapubic	Skin Sun Exposed Lower leg	Spleen	Testis	Ovary	Uterus	Vagina	Whole Blood	Minor Salivary Gland	number of tissues	eGenes
rs272564																																																0
rs1938450	x	x																x		x	x	x		x				x	x			x		x	x							x						13	GNG12
rs11162906																																																0
rs390923				x		x																		x										x			x				x							6	CSF1/STRIP1
rs6692560																																						x										1	RGS4
rs17713879	x	x	x	x	x	x				x		x					x			x	x	x	x	x	x	x	x	x	x	x		x	x	x	x	x	x	x	x	x		x	x		x	x	x	34	ACP1/SH3YL1/
rs3136302	x	x		x		x												x		x				x	x		x	x				x		x		x	x		x	x	x	x				x		19	MSH6/STON1/FOXN2
rs6735304	x			x																														x			x		x	x		x						7	AC016738.4
rs12470661 (rs12478520)	x	x		x	x	x			x	x								x			x	x	x	x	x			x			x	x	x	x	x		x		x	x	x	x					x	25	C2orf72/HTR2B/ARMC9/PSMD1
rs74621754																																																0
rs10008976																																																0
rs315390		x																															x															2	ADAMTS3
rs3775221	x	x	x			x			x	x										x					x								x				x		x	x								12	RP11-397E7.4/AFF1/PTPN13/HSD17B11
rs385886																																														x		1	PPIAP29
rs10947978(rs2477837)																																	x	x														2	FOXP4/NFYA
rs56098119	x			x		x												x		x											x	x	x							x								9	MDN1/LYRM2/ANKRD6
rs150953973				x																																												0
rs180271				x		x														x								x	x													x						6	GNG11/BET1
rs17639782																																x														x		2	SRPK1/RP11-325F22.2
rs1906214																																																0
rs11989271																									x									x														2	HAS2-AS1
rs10868842																																																0
rs12768143	x	x		x		x		x			x	x			x		x			x	x	x	x	x	x			x	x				x	x					x	x	x					x		23	PIP4K2A
rs10764337								x																																								1	PIP4K2A
rs10500747																																																0
rs11226029				x																																												1	PDGFD
rs11221502																				x								x							x	x												4	C11orf45/KCNJ5
rs1343676															x	x					x				x									x		x						x						7	SYT10/RP11-438D14.2
rs7322054																																																0
rs4337169				x	x	x																						x	x			x																6	GPC6/RP11-632L2.2
rs61972411																																																0
rs112500920	x	x		x	x	x	x	x	x	x	x	x		x	x			x		x	x	x	x	x	x		x	x	x		x	x	x	x	x	x	x	x	x	x	x	x			x	x		37	AP3B2/EFL1/WHAMM/GOLGA6L10/MEX3B/HOMER2/RPS17/CPEB1
rs62621400																																																0
rs116643984				x																																												1	WASH3P
rs1804193																				x					x																							2	PMP22
rs73937040	x	x		x		x												x		x				x				x	x				x	x			x			x		x				x		15	MYL12A/RP13-270P17.1
rs146827176	x	x		x		x												x		x			x	x	x							x		x			x	x	x	x		x						16	MYL9/DLGAP4
rs113541629				x		x																																										2	KIAA1671
number of variant with eSNP	11	10	2	16	4	13	1	3	3	4	2	3	0	1	3	1	2	7	0	12	6	5	5	9	10	1	3	10	7	1	3	9	9	13	5	5	9	4	8	10	5	10	1	0	2	7	2

## Sheet: S Table 5
Supplementary Table 3: 35 novel loci GTEx sQTL associations per tissue. "x" represents that the variant is an sQTL. The number of tissues a given variant has sQTL in is indicated on the right and the number of sQTLs per tissue on the bottom.
	Adipose Subcutaneous	Adipose Visceral Omentum	Artery Aorta	Artery Coronary	Artery Tibial	Brain - Amygdala	Brain Anterior cingulate cortex BA24	Brain Caudate basal ganglia	Brain Cerebellar Hemisphere	Brain Cerebellum	Brain Cortex	Brain Frontal Cortex BA9	Brain Hippocampus	Brain Hypothalamus	Brain Nucleus accumbens basal ganglia	Brain Putamen basal ganglia	Brain - Spinal cord (cervical c-1)	Brain - Substantia nigra	Breast Mammary Tissue	Cells EBV.transformed lymphocytes	Cells Transformed fibroblasts	Colon Sigmoid	Colon Transverse	Esophagus Gastroesophageal Junction	Esophagus Mucosa	Esophagus Muscularis	Small Intestine Terminal Ileum	Stomach	Heart Atrial Appendage	Heart Left Ventricle	Kidney - Cortex	Liver	Lung	Muscle Skeletal	Nerve Tibial	Adrenal Gland	Pancreas	Pituitary	Thyroid	Prostate	Skin Not Sun Exposed Suprapubic	Skin Sun Exposed Lower leg	Spleen	Testis	Ovary	Uterus	Vagina	Whole Blood	Small Intestine - Terminal Ileum
rs272564
rs1938450																					x																		x			x
rs11162906
rs390923
rs6692560
rs17713879	x	x	x	x	x	x	x	x	x	x	x	x	x	x	x	x	x	x	x	x	x	x	x	x	x	x	x	x	x	x	x	x	x	x	x	x	x	x	x	x	x	x	x	x	x	x	x	x	x
rs3136302
rs6735304		x	x	x	x	x	x	x	x	x	x	x	x	x	x	x				x	x	x	x	x	x	x	x	x			x		x		x	x	x		x	x	x	x		x	x	x	x	x	x
rs12470661(rs12478520)																																		x
rs74621754
rs10008976
rs315390
rs3775221																																									x	x
rs385886
rs10947978
rs56098119																																			x							x
rs150953973
rs180271
rs17639782
rs1906214	x
rs11989271
rs10868842
rs12768143
rs10764337
rs10500747					x
rs11226029																					x
rs11221502
rs1343676
rs7322054
rs4337169
rs61972411
rs112500920																									x
rs62621400
rs116643984
rs1804193
rs73937040			x																		x				x																x	x		x			x
rs146827176
rs113541629
number of variant with sSNP	2	2	3	2	3	2	2	2	2	2	2	2	2	2	2	2	1	1	1	2	5	2	2	2	4	2	2	2	1	1	2	1	2	1	3	2	2	1	3	2	4	6	1	3	2	2	3	2	2
[truncated: 3 more columns]

## Sheet: S Table 6
Supplementary Table 2: DEPICT tissue enrichment results across BP variants (N= 1324 SNPs with P-value <5x10E-8) and BP pleiotropic variants (N=906 SNPs with pleiotropic P-value<P-value <5x10E-8). The gene set enrichment analysis algorithm is described in Pers et al [66]. Only results with FDR <0.05 are shown.
			Pleiotropy variants			Mediation variants
MeSH term_med	MeSH first level term	MeSH second level term	Nominal P value	False discovery rate < 5%		Nominal P value	False discovery rate < 5%
A07.231.114	Arteries	Cardiovascular System	2.41209e-11	Yes		0.000279782	Yes
A07.231	Blood Vessels	Cardiovascular System	0.000143358	Yes		0.000994386	Yes
A07.231.908	Veins	Cardiovascular System	0.0283486	Yes		0.0139751	Yes
A07.541	Heart	Cardiovascular System	1.72516e-05	Yes		0.0388158	No
A07.541.560	Heart Ventricles	Cardiovascular System	5.60054e-05	Yes		0.0487883	No
A07.541.510	Heart Valves	Cardiovascular System	7.33648e-05	Yes		0.110063	No
A07.541.510.110	Aortic Valve	Cardiovascular System	7.33648e-05	Yes		0.110063	No
A07.541.358	Heart Atria	Cardiovascular System	0.000391124	Yes		0.0402304	No
A07.541.358.100	Atrial Appendage	Cardiovascular System	0.00123115	Yes		0.0407594	No
A11.329.171	Chondrocytes	Cells	8.11896e-06	Yes		0.006407	Yes
A11.872.580	Mesenchymal Stem Cells	Cells	0.000139223	Yes		0.0108266	Yes
A11.329.830	Stromal Cells	Cells	0.000527695	Yes		0.000129218	Yes
A11.329.629	Osteoblasts	Cells	1.05708e-05	Yes		0.170992	No
A11.620	Muscle Cells	Cells	0.000602142	Yes		0.0589492	No
A11.620.520	Myocytes Smooth Muscle	Cells	0.000602142	Yes		0.0589492	No
A11.329.228	Fibroblasts	Cells	0.000715057	Yes		0.0205683	No
A11.872.190.260	Embryoid Bodies	Cells	0.00169128	Yes		0.0802893	No
A11.329.114	Adipocytes	Cells	0.001917	Yes		0.110096	No
A11.436.275	Endothelial Cells	Cells	0.0344354	No		0.0158961	Yes
A03.556.875.875	Stomach	Digestive System	5.33543e-05	Yes		0.00390082	Yes
A03.556.875	Upper Gastrointestinal Tract	Digestive System	0.000102416	Yes		0.00422012	Yes
A03.734	Pancreas	Digestive System	0.000509447	Yes		0.000225213	Yes
A03.556.124.684	Intestine Small	Digestive System	0.00436257	Yes		0.0120971	Yes
A03.556.249.124	Ileum	Digestive System	0.0297854	Yes		0.00466946	Yes
A03.556.124.526.767	Rectum	Digestive System	0.00164734	Yes		0.0951237	No
A03.556.249.249.209	Cecum	Digestive System	0.00325317	Yes		0.0546223	No
A03.556.875.500	Esophagus	Digestive System	0.00476148	Yes		0.0349249	No
A03.556.249	Lower Gastrointestinal Tract	Digestive System	0.00691579	Yes		0.0424589	No
A03.556.249.249	Intestine Large	Digestive System	0.00761099	Yes		0.0503313	No
A03.556.249.249.356	Colon	Digestive System	0.00961989	Yes		0.050124	No
A03.556.249.249.356.668	Colon Sigmoid	Digestive System	0.0101554	Yes		0.0343143	No
A03.556.124	Intestines	Digestive System	0.0128582	Yes		0.0506587	No
A03.556	Gastrointestinal Tract	Digestive System	0.0134457	Yes		0.0597074	No
A06.407	Endocrine Glands	Endocrine System	0.00102365	Yes		0.00183072	Yes
A06.407.312	Gonads	Endocrine System	0.00249151	Yes		0.00505215	Yes
A06.407.071.140	Adrenal Cortex	Endocrine System	0.0116907	Yes		0.000580639	Yes
A06.407.071	Adrenal Glands	Endocrine System	0.0164917	Yes		0.000687216	Yes
A15.145.846	Serum	Hemic and Immune Systems	0.0502479	No		0.00536578	Yes
A02.165	Cartilage	Musculoskeletal System	1.58764e-05	Yes		0.0148673	Yes
A02.835.583	Joints	Musculoskeletal System	0.000357453	Yes		0.00765133	Yes
A02.835.583.443	Joint Capsule	Musculoskeletal System	0.000357453	Yes		0.00765133	Yes
A02.835.583.443.800	Synovial Membrane	Musculoskeletal System	0.000357453	Yes		0.00765133	Yes
A02.835.232.834	Spine	Musculoskeletal System	0.0166019	Yes		0.427566	No
A02.835.232.834.151	Cervical Vertebrae	Musculoskeletal System	0.0170469	Yes		0.415838	No
A04.411	Lung	Respiratory System	0.00505455	Yes		0.000915596	Yes
A10.690.467	Muscle Smooth	Tissues	9.54563e-06	Yes		0.00200625	Yes
A10.615.789	Serous Membrane	Tissues	1.75235e-05	Yes		0.00587082	Yes
A10.165.114	Adipose Tissue	Tissues	0.000237088	Yes		0.00499728	Yes
A10.165.114.830	Adipose Tissue White	Tissues	0.000509455	Yes		0.00935598	Yes
A10.165.114.830.750	Subcutaneous Fat	Tissues	0.000509455	Yes		0.00935598	Yes
A10.165.114.830.500	Abdominal Fat	Tissues	0.00123764	Yes		0.0200259	No
A10.165.114.830.500.750	Subcutaneous Fat Abdominal	Tissues	0.00123764	Yes		0.0200259	No
A10.615.284	Extraembryonic Membranes	Tissues	0.0104744	Yes		0.0195696	No
A10.615.284.473	Chorion	Tissues	0.0104744	Yes		0.0195696	No
A10.165.450.300.425	Keloid	Tissues	0.0125977	Yes		0.602584	No
A10.615	Membranes	Tissues	0.0157054	Yes		0.0239118	No
A10.690	Muscles	Tissues	0.0186777	Yes		0.644334	No
A10.165.450	Granulation Tissue	Tissues	0.0249746	Yes		0.65256	No
A10.165.450.300	Cicatrix	Tissues	0.0249746	Yes		0.65256	No
A10.336	Exocrine Glands	Tissues	0.0848225	No		0.00197098	Yes
A10.336.707	Prostate	Tissues	0.103127	No		0.00266437	Yes
A05.360.319.679.690	Myometrium	Urogenital System	3.39615e-06	Yes		7.63743e-05	Yes
A05.360.319.679	Uterus	Urogenital System	5.33708e-05	Yes		0.000748846	Yes
A05.360.319	Genitalia Female	Urogenital System	9.36223e-05	Yes		0.000767017	Yes
A05.360	Genitalia	Urogenital System	0.000239095	Yes		0.000243148	Yes
A05.360.319.679.490	Endometrium	Urogenital System	0.00125073	Yes		0.00265955	Yes
A05.810	Urinary Tract	Urogenital System	0.00170647	Yes		0.0025429	Yes
A05.360.319.114	Adnexa Uteri	Urogenital System	0.00182268	Yes		0.00319809	Yes
A05.360.319.114.630	Ovary	Urogenital System	0.0018582	Yes		0.003212	Yes
A05.810.453	Kidney	Urogenital System	0.00234987	Yes		0.00347072	Yes
A05.360.319.114.373	Fallopian Tubes	Urogenital System	0.00513962	Yes		0.00128034	Yes
A05.810.890	Urinary Bladder	Urogenital System	0.0241066	Yes		0.00812966	Yes
A05.810.453.324	Kidney Cortex	Urogenital System	5.43355e-05	Yes		0.132042	No
A05.360.319.679.256	Cervix Uteri	Urogenital System	0.00516881	Yes		0.120421	No
A05.360.444.492	Penis	Urogenital System	0.0311228	Yes		0.111861	No
A05.360.444	Genitalia Male	Urogenital System	0.0988008	No		0.00417622	Yes

## Sheet: S Table 7
Supplementary Table 3: DEPICT gene set enrichment results across BP variants (N= 1324 SNPs with P-value <5x10E-8) and BP pleiotropic variants (N=906 SNPs with pleiotropic P-value<P-value <5x10E-8). The gene set enrichment analysis algorithm is described in Pers et al[??]. Results are shown for GO categories, mouse KO phenotypes and protein-protein interaction subnetworks separately. Only results …
		BP Pleiotropy variants			BP Mediation variants
GO categories
GO ID	Term description	Nominal P value	False discovery rate < 5%		Nominal P value	False discovery rate < 5%
GO:0001666	response to hypoxia	2.12249e-09	Yes		0.00451046	Yes
GO:0070482	response to oxygen levels	3.18621e-09	Yes		0.0152513	No
GO:0007507	heart development	1.09006e-08	Yes		4.54814e-07	Yes
GO:0005604	basement membrane	4.65652e-08	Yes		0.0231272	No
GO:0001568	blood vessel development	6.19462e-08	Yes		4.77341e-06	Yes
GO:0001944	vasculature development	7.2639e-08	Yes		1.15948e-06	Yes
GO:0048514	blood vessel morphogenesis	1.05581e-07	Yes		5.73517e-06	Yes
GO:0031589	cell-substrate adhesion	1.10839e-07	Yes		3.2154e-05	Yes
GO:0035295	tube development	1.2146e-07	Yes		3.89597e-09	Yes
GO:0001701	in utero embryonic development	1.69912e-07	Yes		2.8648e-05	Yes
GO:0060537	muscle tissue development	1.80719e-07	Yes		3.38199e-06	Yes
GO:0001525	angiogenesis	1.90388e-07	Yes		0.000126808	Yes
GO:0007160	cell-matrix adhesion	2.06427e-07	Yes		8.86841e-05	Yes
GO:0061061	muscle structure development	2.18736e-07	Yes		1.63928e-06	Yes
GO:0072001	renal system development	2.23411e-07	Yes		0.00900529	No
GO:0014706	striated muscle tissue development	2.9897e-07	Yes		8.11005e-06	Yes
GO:0033273	response to vitamin	3.98302e-07	Yes		0.00727116	No
GO:0001974	blood vessel remodeling	5.19922e-07	Yes		0.00258174	Yes
GO:0007584	response to nutrient	5.52929e-07	Yes		0.040815	No
GO:0001655	urogenital system development	5.81233e-07	Yes		0.00921507	No
GO:0051270	regulation of cellular component movement	7.49238e-07	Yes		0.00459483	Yes
GO:0001822	kidney development	7.59396e-07	Yes		0.00936356	No
GO:0043009	chordate embryonic development	9.12948e-07	Yes		1.10149e-05	Yes
GO:0030198	extracellular matrix organization	9.61727e-07	Yes		0.238973	No
GO:0043062	extracellular structure organization	9.61727e-07	Yes		0.238973	No
GO:0005614	interstitial matrix	9.71409e-07	Yes		0.389555	No
GO:0009792	embryo development ending in birth or egg hatching	1.19306e-06	Yes		1.13767e-05	Yes
GO:2000145	regulation of cell motility	1.24904e-06	Yes		0.00619074	No
GO:0048729	tissue morphogenesis	1.38217e-06	Yes		4.34771e-06	Yes
GO:0048771	tissue remodeling	1.53544e-06	Yes		0.0027983	Yes
GO:0090092	regulation of transmembrane receptor protein serine/threonine kinase signaling pathway	1.60913e-06	Yes		0.0188527	No
GO:0001558	regulation of cell growth	1.87111e-06	Yes		0.00545855	No
GO:0019838	growth factor binding	2.04875e-06	Yes		0.00344739	Yes
GO:0046332	SMAD binding	2.10192e-06	Yes		5.33545e-05	Yes
GO:0007178	transmembrane receptor protein serine/threonine kinase signaling pathway	2.49239e-06	Yes		0.0194684	No
GO:0003007	heart morphogenesis	3.2624e-06	Yes		0.000260908	Yes
GO:0017147	Wnt-protein binding	3.89249e-06	Yes		0.0214258	No
GO:0007517	muscle organ development	3.93791e-06	Yes		1.16264e-05	Yes
GO:0001078	RNA polymerase II core promoter proximal region sequence-specific DNA binding transcription factor activity involved in negative regulation of transcription	4.58091e-06	Yes		0.00207874	Yes
GO:0005518	collagen binding	4.90356e-06	Yes		0.00118835	Yes
GO:0010810	regulation of cell-substrate adhesion	5.27206e-06	Yes		0.000747995	Yes
GO:0030308	negative regulation of cell growth	5.58637e-06	Yes		0.0546247	No
GO:0016049	cell growth	5.78275e-06	Yes		0.00351959	Yes
GO:0009991	response to extracellular stimulus	5.85854e-06	Yes		0.390166	No
GO:0042813	Wnt-activated receptor activity	6.8597e-06	Yes		0.0301139	No
GO:0000981	sequence-specific DNA binding RNA polymerase II transcription factor activity	6.91413e-06	Yes		6.27885e-08	Yes
GO:0030334	regulation of cell migration	7.5244e-06	Yes		0.00672199	No
GO:0043256	laminin complex	9.22001e-06	Yes		0.023995	No
GO:0031667	response to nutrient levels	9.4408e-06	Yes		0.368229	No
GO:0035239	tube morphogenesis	9.44155e-06	Yes		5.31909e-07	Yes
GO:0005520	insulin-like growth factor binding	1.03704e-05	Yes		0.0448782	No
GO:0005201	extracellular matrix structural constituent	1.07668e-05	Yes		0.742441	No
GO:0030199	collagen fibril organization	1.2519e-05	Yes		0.533728	No
GO:0031983	vesicle lumen	1.28685e-05	Yes		0.347645	No
GO:0003205	cardiac chamber development	1.29283e-05	Yes		0.00182017	Yes
GO:0050679	positive regulation of epithelial cell proliferation	1.33e-05	Yes		0.0897964	No
GO:0007179	transforming growth factor beta receptor signaling pathway	1.42371e-05	Yes		0.00734023	No
GO:0051216	cartilage development	1.54137e-05	Yes		0.00124777	Yes
GO:0030155	regulation of cell adhesion	1.57945e-05	Yes		0.000238289	Yes
GO:0048844	artery morphogenesis	1.58713e-05	Yes		0.0438542	No
GO:0005605	basal lamina	1.65405e-05	Yes		0.0258063	No
GO:0003705	RNA polymerase II distal enhancer sequence-specific DNA binding transcription factor activity	1.75533e-05	Yes		9.67823e-08	Yes
GO:0016922	ligand-dependent nuclear receptor binding	1.8555e-05	Yes		0.00465404	Yes
GO:0005924	cell-substrate adherens junction	2.01063e-05	Yes		1.89281e-08	Yes
GO:0090101	negative regulation of transmembrane receptor protein serine/threonine kinase signaling pathway	2.0819e-05	Yes		0.272002	No
GO:0005667	transcription factor complex	2.08679e-05	Yes		1.03622e-09	Yes
GO:0071495	cellular response to endogenous stimulus	2.11197e-05	Yes		1.73296e-05	Yes
GO:0030055	cell-substrate junction	2.20906e-05	Yes		7.32903e-08	Yes
GO:0008201	heparin binding	2.22418e-05	Yes		0.918872	No
GO:0060205	cytoplasmic membrane-bounded vesicle lumen	2.34747e-05	Yes		0.320222	No
GO:0042692	muscle cell differentiation	2.38411e-05	Yes		0.000203861	Yes
GO:0016641	oxidoreductase activity, acting on the CH-NH2 group of donors, oxygen as acceptor	2.62559e-05	Yes		0.0372387	No
GO:0050678	regulation of epithelial cell proliferation	2.758e-05	Yes		0.0329978	No
GO:0060343	trabecula formation	2.8063e-05	Yes		0.545899	No
GO:0031490	chromatin DNA binding	2.84202e-05	Yes		0.00146545	Yes
GO:0040012	regulation of locomotion	2.88091e-05	Yes		0.0284225	No
GO:0003231	cardiac ventricle development	2.89562e-05	Yes		0.00588388	No
GO:0001934	positive regulation of protein phosphorylation	2.97806e-05	Yes		0.206273	No
GO:0001501	skeletal system development	3.08608e-05	Yes		0.00272507	Yes
GO:0051146	striated muscle cell differentiation	3.14266e-05	Yes		0.00536264	No
GO:0005539	glycosaminoglycan binding	3.14901e-05	Yes		0.709656	No
GO:0001968	fibronectin binding	3.17379e-05	Yes		0.636803	No
GO:0008134	transcription factor binding	3.18493e-05	Yes		2.66284e-09	Yes
GO:0060541	respiratory system development	3.26129e-05	Yes		1.24008e-05	Yes
GO:0045785	positive regulation of cell adhesion	3.58254e-05	Yes		0.0497165	No
GO:0055001	muscle cell development	3.60657e-05	Yes		0.00238253	Yes
GO:0017015	regulation of transforming growth factor beta receptor signaling pathway	3.65252e-05	Yes		0.00162949	Yes
GO:0000982	RNA polymerase II core promoter proximal region sequence-specific DNA binding transcription factor activity	3.7885e-05	Yes		0.000519503	Yes
GO:0044212	transcription regulatory region DNA binding	3.84553e-05	Yes		2.17393e-05	Yes
GO:0008217	regulation of blood pressure	3.92612e-05	Yes		0.169175	No
GO:0060538	skeletal muscle organ development	3.95106e-05	Yes		9.45203e-05	Yes
GO:0034774	secretory granule lumen	4.00517e-05	Yes		0.329894	No
GO:0045926	negative regulation of growth	4.46154e-05	Yes		0.075354	No
GO:0044420	extracellular matrix part	4.48594e-05	Yes		0.72875	No
GO:0003206	cardiac chamber morphogenesis	4.54546e-05	Yes		0.00757676	No
GO:0061383	trabecula morphogenesis	4.7747e-05	Yes		0.291865	No
GO:0048738	cardiac muscle tissue development	4.78157e-05	Yes		0.000631425	Yes
GO:0031093	platelet alpha granule lumen	4.87008e-05	Yes		0.33087	No
GO:0005925	focal adhesion	5.03469e-05	Yes		2.8605e-08	Yes
GO:0008015	blood circulation	5.17125e-05	Yes		0.0201785	No
GO:0090100	positive regulation of transmembrane receptor protein serine/threonine kinase signaling pathway	5.24712e-05	Yes		0.00283592	Yes
GO:0003013	circulatory system process	5.31477e-05	Yes		0.0229951	No
GO:0005178	integrin binding	5.46228e-05	Yes		0.0808485	No
GO:0001569	patterning of blood vessels	5.47222e-05	Yes		0.000127847	Yes
GO:0006939	smooth muscle contraction	5.62489e-05	Yes		0.272656	No
GO:0031012	extracellular matrix	5.82715e-05	Yes		0.726574	No
GO:0002009	morphogenesis of an epithelium	5.98254e-05	Yes		8.08002e-06	Yes
GO:0071295	cellular response to vitamin	6.16344e-05	Yes		0.0499307	No
GO:0061008	hepaticobiliary system development	6.17529e-05	Yes		0.0861409	No
GO:0071456	cellular response to hypoxia	6.42986e-05	Yes		0.168038	No
GO:0000975	regulatory region DNA binding	6.96763e-05	Yes		2.0704e-05	Yes
GO:0001067	regulatory region nucleic acid binding	6.96763e-05	Yes		2.0704e-05	Yes
GO:0001871	pattern binding	7.09588e-05	Yes		0.573117	No
GO:0030247	polysaccharide binding	7.09588e-05	Yes		0.573117	No
GO:0005578	proteinaceous extracellular matrix	7.72598e-05	Yes		0.717197	No
GO:0016638	oxidoreductase activity, acting on the CH-NH2 group of donors	8.36458e-05	Yes		0.0408498	No
GO:0071453	cellular response to oxygen levels	8.86483e-05	Yes		0.199113	No
GO:0031668	cellular response to extracellular stimulus	9.1482e-05	Yes		0.858687	No
GO:0060840	artery development	9.22857e-05	Yes		0.0267596	No
GO:0008305	integrin complex	9.48379e-05	Yes		0.000663625	Yes
GO:0034504	protein localization to nucleus	9.58526e-05	Yes		0.00179344	Yes
GO:0007519	skeletal muscle tissue development	9.73789e-05	Yes		0.000397291	Yes
GO:0048644	muscle organ morphogenesis	0.000101164	Yes		0.0775043	No
GO:0010212	response to ionizing radiation	0.000104281	Yes		0.966946	No
GO:0040017	positive regulation of locomotion	0.000108821	Yes		0.00870684	No
GO:0050840	extracellular matrix binding	0.000112872	Yes		0.00704329	No
GO:0051272	positive regulation of cellular component movement	0.00011306	Yes		0.00430032	Yes
GO:0009968	negative regulation of signal transduction	0.000113699	Yes		7.53761e-08	Yes
GO:0042327	positive regulation of phosphorylation	0.000115235	Yes		0.103962	No
GO:0030324	lung development	0.00012059	Yes		0.000206193	Yes
GO:2000027	regulation of organ morphogenesis	0.000121185	Yes		0.000623989	Yes
GO:2000147	positive regulation of cell motility	0.00012197	Yes		0.00723511	No
GO:0048568	embryonic organ development	0.000124812	Yes		0.000308558	Yes
GO:0010906	regulation of glucose metabolic process	0.00013929	Yes		0.035565	No
GO:0030323	respiratory tube development	0.000146765	Yes		0.000168979	Yes
GO:0045445	myoblast differentiation	0.000155352	Yes		0.0013789	Yes
GO:0060429	epithelium development	0.00015609	Yes		3.60111e-07	Yes
GO:0070161	anchoring junction	0.000160722	Yes		6.44764e-06	Yes
GO:0032403	protein complex binding	0.000164977	Yes		0.0125	No
GO:0048407	platelet-derived growth factor binding	0.000167502	Yes		0.108681	No
GO:0055002	striated muscle cell development	0.00017348	Yes		0.0188001	No
GO:0060348	bone development	0.000173854	Yes		0.00654889	No
GO:0003712	transcription cofactor activity	0.000179147	Yes		4.18748e-08	Yes
GO:0060415	muscle tissue morphogenesis	0.000188183	Yes		0.107151	No
GO:0001889	liver development	0.000189406	Yes		0.191203	No
GO:0071479	cellular response to ionizing radiation	0.000190602	Yes		0.858058	No
GO:0031253	cell projection membrane	0.000191911	Yes		0.12861	No
GO:0048871	multicellular organismal homeostasis	0.000195696	Yes		0.0717062	No
GO:0003012	muscle system process	0.000202266	Yes		0.212365	No
GO:0030335	positive regulation of cell migration	0.000206841	Yes		0.00966871	No
GO:0035924	cellular response to vascular endothelial growth factor stimulus	0.000207631	Yes		0.000372813	Yes
GO:0005912	adherens junction	0.000222749	Yes		3.64653e-07	Yes
GO:0030512	negative regulation of transforming growth factor beta receptor signaling pathway	0.000226846	Yes		0.0510175	No
GO:0014075	response to amine stimulus	0.000228211	Yes		0.999639	No
GO:0050673	epithelial cell proliferation	0.00023124	Yes		0.072122	No
GO:0048010	vascular endothelial growth factor receptor signaling pathway	0.000238352	Yes		0.00160124	Yes
GO:0000988	protein binding transcription factor activity	0.000246839	Yes		1.08341e-08	Yes
GO:0045766	positive regulation of angiogenesis	0.000254011	Yes		0.110716	No
GO:0071417	cellular response to organic nitrogen	0.000261901	Yes		0.999904	No
GO:0002062	chondrocyte differentiation	0.000280101	Yes		0.000245753	Yes
GO:0000989	transcription factor binding transcription factor activity	0.00028811	Yes		2.67794e-08	Yes
GO:0005911	cell-cell junction	0.000298148	Yes		0.038684	No
GO:0010562	positive regulation of phosphorus metabolic process	0.000302114	Yes		0.0739874	No
GO:0045937	positive regulation of phosphate metabolic process	0.000302114	Yes		0.0739874	No
GO:0016323	basolateral plasma membrane	0.000304476	Yes		3.09855e-07	Yes
GO:0005160	transforming growth factor beta receptor binding	0.000310781	Yes		0.00166972	Yes
GO:0010243	response to organic nitrogen	0.000314958	Yes		0.999733	No
GO:0042383	sarcolemma	0.000318195	Yes		0.323582	No
GO:0035051	cardiac cell differentiation	0.000319717	Yes		0.00290567	Yes
GO:0001890	placenta development	0.000320773	Yes		0.0192683	No
GO:0003151	outflow tract morphogenesis	0.000322474	Yes		0.0585272	No
GO:0031091	platelet alpha granule	0.000333749	Yes		0.355438	No
GO:0051170	nuclear import	0.000334513	Yes		0.00155112	Yes
GO:0043200	response to amino acid stimulus	0.000336285	Yes		0.999243	No
GO:0008285	negative regulation of cell proliferation	0.000337923	Yes		0.0471634	No
GO:0060828	regulation of canonical Wnt receptor signaling pathway	0.000340029	Yes		0.000176493	Yes
GO:0010811	positive regulation of cell-substrate adhesion	0.000343881	Yes		0.130045	No
GO:0032147	activation of protein kinase activity	0.000352459	Yes		0.175786	No
GO:0048598	embryonic morphogenesis	0.000362123	Yes		0.000274946	Yes
GO:0006606	protein import into nucleus	0.000362675	Yes		0.00164798	Yes
GO:0048754	branching morphogenesis of a tube	0.000409479	Yes		2.89043e-06	Yes
GO:0043236	laminin binding	0.000414952	Yes		5.96785e-06	Yes
GO:0006936	muscle contraction	0.00041654	Yes		0.179163	No
GO:0040008	regulation of growth	0.000425511	Yes		0.0241146	No
GO:0001503	ossification	0.000427115	Yes		0.00223666	Yes
GO:0003014	renal system process	0.000428629	Yes		0.671758	No
GO:0001763	morphogenesis of a branching structure	0.000441632	Yes		1.804e-06	Yes
GO:0001106	RNA polymerase II transcription corepressor activity	0.000443983	Yes		0.000441928	Yes
GO:0001191	RNA polymerase II transcription factor binding transcription factor activity involved in negative regulation of transcription	0.000443983	Yes		0.000441928	Yes
GO:0090090	negative regulation of canonical Wnt receptor signaling pathway	0.000455229	Yes		0.00894686	No
GO:0060070	canonical Wnt receptor signaling pathway	0.000460977	Yes		0.00201614	Yes
GO:0071230	cellular response to amino acid stimulus	0.00048983	Yes		0.999929	No
GO:0007565	female pregnancy	0.000490097	Yes		0.385666	No
GO:0003208	cardiac ventricle morphogenesis	0.000495985	Yes		0.122413	No
GO:0031670	cellular response to nutrient	0.000505296	Yes		0.165401	No
GO:0005581	collagen	0.000506816	Yes		0.856835	No
GO:0031526	brush border membrane	0.000535873	Yes		0.281978	No
GO:0030947	regulation of vascular endothelial growth factor receptor signaling pathway	0.000539871	Yes		0.00725641	No
GO:0061035	regulation of cartilage development	0.000570248	Yes		0.0345528	No
GO:0050431	transforming growth factor beta binding	0.000570258	Yes		0.0117691	No
GO:0048732	gland development	0.000590297	Yes		0.00453564	Yes
GO:0061138	morphogenesis of a branching epithelium	0.00062646	Yes		4.4737e-06	Yes
GO:0004857	enzyme inhibitor activity	0.000632148	Yes		0.774721	No
GO:0071496	cellular response to external stimulus	0.000640069	Yes		0.519829	No
GO:0071418	cellular response to amine stimulus	0.000649735	Yes		0.999982	No
GO:0060349	bone morphogenesis	0.000704255	Yes		0.000637508	Yes
GO:0005158	insulin receptor binding	0.000705514	Yes		0.000576713	Yes
GO:0030514	negative regulation of BMP signaling pathway	0.000728944	Yes		0.740495	No
GO:0032835	glomerulus development	0.000732998	Yes		0.00431575	Yes
GO:0019199	transmembrane receptor protein kinase activity	0.000744651	Yes		0.213625	No
GO:0035150	regulation of tube size	0.000765623	Yes		0.0538465	No
GO:0032432	actin filament bundle	0.000803257	Yes		0.000654561	Yes
GO:0000976	transcription regulatory region sequence-specific DNA binding	0.000816498	Yes		0.042823	No
GO:0051093	negative regulation of developmental process	0.000824086	Yes		0.0212309	No
GO:0050880	regulation of blood vessel size	0.000827247	Yes		0.0536986	No
GO:0030510	regulation of BMP signaling pathway	0.000834887	Yes		0.381185	No
GO:0032330	regulation of chondrocyte differentiation	0.00084077	Yes		0.0101219	No
GO:0048185	activin binding	0.000842403	Yes		0.0394555	No
GO:0010675	regulation of cellular carbohydrate metabolic process	0.000851817	Yes		0.254323	No
GO:0060347	heart trabecula formation	0.000861575	Yes		0.129899	No
GO:0090257	regulation of muscle system process	0.000863409	Yes		0.294284	No
GO:0001952	regulation of cell-matrix adhesion	0.000866043	Yes		0.00700134	No
GO:0006109	regulation of carbohydrate metabolic process	0.000890035	Yes		0.186156	No
GO:0031528	microvillus membrane	0.000893539	Yes		0.246579	No
GO:0003006	developmental process involved in reproduction	0.000898293	Yes		0.287222	No
GO:0045596	negative regulation of cell differentiation	0.000938133	Yes		0.0138954	No
GO:0031669	cellular response to nutrient levels	0.000947454	Yes		0.852082	No
GO:0001945	lymph vessel development	0.000961056	Yes		0.0788074	No
GO:0016706	oxidoreductase activity, acting on paired donors, with incorporation or reduction of molecular oxygen, 2-oxoglutarate as one donor, and incorporation of one atom each of oxygen into both donors	0.000961434	Yes		0.0976706	No
GO:0043388	positive regulation of DNA binding	0.000983884	Yes		0.0782872	No
GO:0046982	protein heterodimerization activity	0.00100057	Yes		0.000694116	Yes
GO:0055008	cardiac muscle tissue morphogenesis	0.00100058	Yes		0.0641572	No
GO:0030018	Z disc	0.00103758	Yes		0.182561	No
GO:0005796	Golgi lumen	0.00103826	Yes		0.0782201	No
GO:0005583	fibrillar collagen	0.00105267	Yes		0.919634	No
GO:0072006	nephron development	0.00105506	Yes		0.0682646	No
GO:0010907	positive regulation of glucose metabolic process	0.00109415	Yes		0.111027	No
GO:0043467	regulation of generation of precursor metabolites and energy	0.0011631	Yes		0.000585295	Yes
GO:0001894	tissue homeostasis	0.00118219	Yes		0.0303929	No
GO:0005903	brush border	0.00122339	Yes		0.123698	No
GO:0003682	chromatin binding	0.00123001	Yes		2.96358e-05	Yes
GO:0001101	response to acid	0.00127604	Yes		0.922036	No
GO:0071229	cellular response to acid	0.00129654	Yes		0.99973	No
GO:0001725	stress fiber	0.00129982	Yes		0.000719126	Yes
GO:0045165	cell fate commitment	0.00136265	Yes		9.65669e-05	Yes
GO:0032331	negative regulation of chondrocyte differentiation	0.00137418	Yes		0.944258	No
GO:0017046	peptide hormone binding	0.00139246	Yes		0.300604	No
GO:0005507	copper ion binding	0.00140597	Yes		0.25633	No
GO:0010165	response to X-ray	0.00143007	Yes		0.988991	No
GO:0090287	regulation of cellular response to growth factor stimulus	0.00148151	Yes		0.0119434	No
GO:0033365	protein localization to organelle	0.00149432	Yes		0.00784008	No
GO:0004867	serine-type endopeptidase inhibitor activity	0.0015037	Yes		0.699008	No
GO:0045765	regulation of angiogenesis	0.00152518	Yes		0.132731	No
GO:0035035	histone acetyltransferase binding	0.00154418	Yes		0.000936905	Yes
GO:0007568	aging	0.00158421	Yes		0.0755513	No
GO:0005024	transforming growth factor beta-activated receptor activity	0.00158788	Yes		0.0498144	No
GO:0048545	response to steroid hormone stimulus	0.00158821	Yes		0.11855	No
GO:0016327	apicolateral plasma membrane	0.00160803	Yes		0.283872	No
GO:0010717	regulation of epithelial to mesenchymal transition	0.00161251	Yes		0.0442834	No
GO:0003073	regulation of systemic arterial blood pressure	0.00166419	Yes		0.368991	No
GO:0005902	microvillus	0.00172559	Yes		0.0865818	No
GO:0005161	platelet-derived growth factor receptor binding	0.00182444	Yes		0.00532638	No
GO:0043010	camera-type eye development	0.00185738	Yes		0.146252	No
GO:0060350	endochondral bone morphogenesis	0.00194577	Yes		0.000417135	Yes
GO:0022603	regulation of anatomical structure morphogenesis	0.00194852	Yes		9.30807e-07	Yes
GO:0030165	PDZ domain binding	0.00196796	Yes		0.150784	No
GO:0061384	heart trabecula morphogenesis	0.00198897	Yes		0.0353956	No
GO:0001954	positive regulation of cell-matrix adhesion	0.00199717	Yes		0.0979811	No
GO:0042056	chemoattractant activity	0.00204906	Yes		0.201221	No
GO:0001654	eye development	0.00205521	Yes		0.310199	No
GO:0071363	cellular response to growth factor stimulus	0.0020706	Yes		0.000111945	Yes
GO:0030414	peptidase inhibitor activity	0.0021107	Yes		0.829116	No
GO:0055010	ventricular cardiac muscle tissue morphogenesis	0.0021317	Yes		0.116093	No
GO:0035272	exocrine system development	0.00223189	Yes		0.0388802	No
GO:0051482	elevation of cytosolic calcium ion concentration involved in phospholipase C-activating G-protein coupled signaling pathway	0.00226377	Yes		0.155377	No
GO:0003229	ventricular cardiac muscle tissue development	0.00231227	Yes		0.0763927	No
GO:0060351	cartilage development involved in endochondral bone morphogenesis	0.00233425	Yes		0.0784641	No
GO:0007389	pattern specification process	0.00233491	Yes		0.000654152	Yes
GO:0003018	vascular process in circulatory system	0.00241785	Yes		0.0312382	No
GO:0010576	metalloenzyme regulator activity	0.00244298	Yes		0.62493	No
GO:0010035	response to inorganic substance	0.0024878	Yes		0.359478	No
GO:0071305	cellular response to vitamin D	0.00252515	Yes		0.0197965	No
GO:0048705	skeletal system morphogenesis	0.00256903	Yes		0.00312185	Yes
GO:0014031	mesenchymal cell development	0.00257058	Yes		0.0173756	No
GO:0017038	protein import	0.00264282	Yes		0.000719938	Yes
GO:0072509	divalent inorganic cation transmembrane transporter activity	0.00268065	Yes		0.830372	No
GO:0030036	actin cytoskeleton organization	0.00270868	Yes		1.78463e-08	Yes
GO:0002762	negative regulation of myeloid leukocyte differentiation	0.00271011	Yes		0.499443	No
GO:0003713	transcription coactivator activity	0.00274735	Yes		7.04453e-07	Yes
GO:0035282	segmentation	0.00276621	Yes		0.0351973	No
GO:0050918	positive chemotaxis	0.00280296	Yes		0.472092	No
GO:0048565	digestive tract development	0.00282672	Yes		0.010199	No
GO:0007566	embryo implantation	0.00283248	Yes		0.810296	No
GO:0015629	actin cytoskeleton	0.00287447	Yes		0.000253674	Yes
GO:0010927	cellular component assembly involved in morphogenesis	0.00288002	Yes		0.101206	No
GO:0006937	regulation of muscle contraction	0.00292238	Yes		0.252295	No
GO:0032526	response to retinoic acid	0.0030049	Yes		0.104924	No
GO:0043296	apical junction complex	0.00301103	Yes		0.290981	No
GO:0004714	transmembrane receptor protein tyrosine kinase activity	0.00304843	Yes		0.436368	No
GO:0060562	epithelial tube morphogenesis	0.00307215	Yes		1.91199e-05	Yes
GO:0031032	actomyosin structure organization	0.003116	Yes		0.0233072	No
GO:0070848	response to growth factor stimulus	0.00315128	Yes		3.58577e-05	Yes
GO:0071478	cellular response to radiation	0.00317447	Yes		0.843684	No
GO:0048762	mesenchymal cell differentiation	0.0032028	Yes		0.00719928	No
GO:0043410	positive regulation of MAPK cascade	0.00322891	Yes		0.0220494	No
GO:0061134	peptidase regulator activity	0.00329879	Yes		0.833656	No
GO:0001958	endochondral ossification	0.00333821	Yes		0.000745405	Yes
GO:0060216	definitive hemopoiesis	0.00335782	Yes		0.0632804	No
GO:0033135	regulation of peptidyl-serine phosphorylation	0.00337354	Yes		0.720868	No
GO:0042641	actomyosin	0.00338204	Yes		0.00257295	Yes
GO:0033189	response to vitamin A	0.00338236	Yes		0.157421	No
GO:0002040	sprouting angiogenesis	0.00340556	Yes		0.168095	No
GO:0048736	appendage development	0.00342675	Yes		0.0234482	No
GO:0060173	limb development	0.00342675	Yes		0.0234482	No
GO:0030218	erythrocyte differentiation	0.00345711	Yes		0.0113528	No
GO:0014065	phosphatidylinositol 3-kinase cascade	0.00372994	Yes		0.181075	No
GO:0001938	positive regulation of endothelial cell proliferation	0.00373718	Yes		0.675909	No
GO:0001837	epithelial to mesenchymal transition	0.00374389	Yes		0.0112425	No
GO:0007044	cell-substrate junction assembly	0.00377284	Yes		0.0125851	No
GO:0045178	basal part of cell	0.00378608	Yes		0.182873	No
GO:0007184	SMAD protein import into nucleus	0.00386109	Yes		0.0351712	No
GO:0055123	digestive system development	0.00390258	Yes		0.00847759	No
GO:0051213	dioxygenase activity	0.00406478	Yes		0.185128	No
GO:0038024	cargo receptor activity	0.00406863	Yes		0.918363	No
GO:0001085	RNA polymerase II transcription factor binding	0.00410152	Yes		0.0418177	No
GO:0003158	endothelium development	0.00411972	Yes		0.0325775	No
GO:0030239	myofibril assembly	0.00414031	Yes		0.0420185	No
GO:0001077	RNA polymerase II core promoter proximal region sequence-specific DNA binding transcription factor activity involved in positive regulation of transcription	0.00419727	Yes		0.00649388	No
GO:0061135	endopeptidase regulator activity	0.00420937	Yes		0.870936	No
GO:0055007	cardiac muscle cell differentiation	0.00424305	Yes		0.00571362	No
GO:0045597	positive regulation of cell differentiation	0.00482256	No		0.000266652	Yes
GO:0033613	activating transcription factor binding	0.00521848	No		1.24654e-05	Yes
GO:0060021	palate development	0.00526957	No		2.56404e-06	Yes
GO:0030029	actin filament-based process	0.00539795	No		8.85477e-06	Yes
GO:0032386	regulation of intracellular transport	0.0054625	No		0.00101026	Yes
GO:0003779	actin binding	0.00557731	No		0.0023084	Yes
GO:0033002	muscle cell proliferation	0.00596653	No		0.000206662	Yes
GO:0000122	negative regulation of transcription from RNA polymerase II promoter	0.00604647	No		1.50155e-09	Yes
GO:0048332	mesoderm morphogenesis	0.00609893	No		0.00182066	Yes
GO:0060485	mesenchyme development	0.00645765	No		0.00399469	Yes
GO:0051347	positive regulation of transferase activity	0.00649608	No		0.00202948	Yes
GO:0050681	androgen receptor binding	0.00686925	No		0.000105398	Yes
GO:0043434	response to peptide hormone stimulus	0.00811012	No		0.00122561	Yes
GO:0030518	intracellular steroid hormone receptor signaling pathway	0.00909014	No		2.48408e-06	Yes
GO:0045860	positive regulation of protein kinase activity	0.00956678	No		0.00367157	Yes
GO:0030511	positive regulation of transforming growth factor beta receptor signaling pathway	0.0096031	No		0.00396269	Yes
GO:0090066	regulation of anatomical structure size	0.0100133	No		0.00086817	Yes
GO:0048286	lung alveolus development	0.0103023	No		0.000395925	Yes
GO:0030111	regulation of Wnt receptor signaling pathway	0.0103029	No		3.01719e-05	Yes
GO:0030178	negative regulation of Wnt receptor signaling pathway	0.0103783	No		0.00369757	Yes
GO:0008301	DNA binding, bending	0.0106341	No		0.00258592	Yes
GO:0005979	regulation of glycogen biosynthetic process	0.0110948	No		0.00409767	Yes
GO:0010962	regulation of glucan biosynthetic process	0.0110948	No		0.00409767	Yes
GO:0032885	regulation of polysaccharide biosynthetic process	0.0110948	No		0.00409767	Yes
GO:0070411	I-SMAD binding	0.0113872	No		0.00304856	Yes
GO:0033674	positive regulation of kinase activity	0.0116906	No		0.00248664	Yes
GO:0045121	membrane raft	0.0127082	No		0.00129315	Yes
GO:0003714	transcription corepressor activity	0.0129319	No		1.86735e-06	Yes
GO:0055017	cardiac muscle tissue growth	0.0129493	No		0.00401232	Yes
GO:0006605	protein targeting	0.0131362	No		0.0014013	Yes
GO:0030522	intracellular receptor mediated signaling pathway	0.0131856	No		6.19072e-11	Yes
GO:0043408	regulation of MAPK cascade	0.014132	No		0.000255164	Yes
GO:0030855	epithelial cell differentiation	0.0141698	No		1.71228e-05	Yes
GO:0001570	vasculogenesis	0.0142906	No		0.000618621	Yes
GO:0019900	kinase binding	0.0144629	No		3.17922e-06	Yes
GO:0060795	cell fate commitment involved in formation of primary germ layer	0.0149299	No		0.00464432	Yes
GO:0048634	regulation of muscle organ development	0.0151198	No		2.73091e-05	Yes
GO:0048641	regulation of skeletal muscle tissue development	0.0151734	No		7.58683e-05	Yes
GO:0051130	positive regulation of cellular component organization	0.0177798	No		0.000307642	Yes
GO:0005159	insulin-like growth factor receptor binding	0.0179232	No		0.000723951	Yes
GO:0035265	organ growth	0.0182215	No		0.00184907	Yes
GO:0001704	formation of primary germ layer	0.0188239	No		0.000189033	Yes
GO:0019901	protein kinase binding	0.0188645	No		7.74401e-06	Yes
GO:0002064	epithelial cell development	0.0202277	No		0.00343779	Yes
GO:0016055	Wnt receptor signaling pathway	0.020916	No		0.00277429	Yes
GO:0032870	cellular response to hormone stimulus	0.0217515	No		4.56755e-06	Yes
GO:0048645	organ formation	0.022298	No		0.00461363	Yes
GO:0016202	regulation of striated muscle tissue development	0.023995	No		6.14215e-05	Yes
GO:0070412	R-SMAD binding	0.0245138	No		0.00116763	Yes
GO:0019902	phosphatase binding	0.0252145	No		1.87491e-05	Yes
GO:0003690	double-stranded DNA binding	0.0260124	No		0.00245626	Yes
GO:0060090	binding, bridging	0.0264649	No		1.25366e-05	Yes
GO:0051090	regulation of sequence-specific DNA binding transcription factor activity	0.0280077	No		0.000197936	Yes
GO:0004713	protein tyrosine kinase activity	0.0283738	No		3.08142e-07	Yes
GO:0008360	regulation of cell shape	0.0285842	No		0.00121984	Yes
GO:0060419	heart growth	0.0291123	No		0.0011627	Yes
GO:0043491	protein kinase B signaling cascade	0.0294706	No		0.00299421	Yes
GO:0043034	costamere	0.030875	No		0.0033732	Yes
GO:0000165	MAPK cascade	0.0314263	No		6.05428e-05	Yes
GO:0042805	actinin binding	0.0318316	No		0.00264908	Yes
GO:0042826	histone deacetylase binding	0.0352699	No		5.15475e-08	Yes
GO:0043566	structure-specific DNA binding	0.0356523	No		0.0036328	Yes
GO:0030674	protein binding, bridging	0.0363776	No		3.94604e-05	Yes
GO:0010627	regulation of intracellular protein kinase cascade	0.0365103	No		5.45889e-05	Yes
GO:0043406	positive regulation of MAP kinase activity	0.037855	No		0.000312979	Yes
GO:0030521	androgen receptor signaling pathway	0.0378939	No		4.77069e-05	Yes
GO:0005884	actin filament	0.0381745	No		0.000693395	Yes
GO:0048339	paraxial mesoderm development	0.0387113	No		0.00104855	Yes
GO:0010740	positive regulation of intracellular protein kinase cascade	0.0400809	No		0.00175514	Yes
GO:0035258	steroid hormone receptor binding	0.0449617	No		8.85426e-06	Yes
GO:0035257	nuclear hormone receptor binding	0.0521755	No		5.67593e-07	Yes
GO:0007498	mesoderm development	0.0530962	No		0.00117559	Yes
GO:0005938	cell cortex	0.0532294	No		0.00168263	Yes
GO:0031252	cell leading edge	0.0559617	No		0.000187242	Yes
GO:0042803	protein homodimerization activity	0.0564219	No		0.000173194	Yes
GO:0003706	ligand-regulated transcription factor activity	0.0570456	No		1.81132e-05	Yes
GO:0071900	regulation of protein serine/threonine kinase activity	0.0619631	No		0.000524917	Yes
GO:0007229	integrin-mediated signaling pathway	0.0628339	No		0.00165234	Yes
GO:0000932	cytoplasmic mRNA processing body	0.0693615	No		7.90684e-05	Yes
GO:0003707	steroid hormone receptor activity	0.0722485	No		0.00066603	Yes
GO:0030097	hemopoiesis	0.0737308	No		0.00302568	Yes
GO:0008013	beta-catenin binding	0.077931	No		0.00233881	Yes
GO:0019903	protein phosphatase binding	0.0796439	No		0.000738345	Yes
GO:0048534	hemopoietic or lymphoid organ development	0.0829567	No		0.00251107	Yes
GO:0016581	NuRD complex	0.0834203	No		0.00420162	Yes
GO:0034446	substrate adhesion-dependent cell spreading	0.0847511	No		0.00283322	Yes
GO:0051427	hormone receptor binding	0.08574	No		1.10015e-07	Yes
GO:0043405	regulation of MAP kinase activity	0.0880766	No		2.73395e-05	Yes
GO:0001726	ruffle	0.0894313	No		0.000300471	Yes
GO:0007266	Rho protein signal transduction	0.0935879	No		0.000311364	Yes
GO:0051017	actin filament bundle assembly	0.097259	No		0.00362265	Yes
GO:0030027	lamellipodium	0.0990177	No		1.34753e-05	Yes
GO:0030177	positive regulation of Wnt receptor signaling pathway	0.0992427	No		0.0047152	Yes
GO:0071902	positive regulation of protein serine/threonine kinase activity	0.107912	No		0.000796013	Yes
GO:0004709	MAP kinase kinase kinase activity	0.110367	No		2.42334e-05	Yes
GO:0000118	histone deacetylase complex	0.111332	No		0.000277823	Yes
GO:0032970	regulation of actin filament-based process	0.113563	No		0.00180524	Yes
GO:0007015	actin filament organization	0.114337	No		2.38483e-05	Yes
GO:0014037	Schwann cell differentiation	0.119121	No		1.41571e-05	Yes
GO:0001709	cell fate determination	0.122114	No		0.00152254	Yes
GO:0008138	protein tyrosine/serine/threonine phosphatase activity	0.136031	No		0.0047792	Yes
GO:0030031	cell projection assembly	0.155765	No		0.00181268	Yes
GO:0007265	Ras protein signal transduction	0.160588	No		7.46505e-06	Yes
GO:0032956	regulation of actin cytoskeleton organization	0.163464	No		0.00220934	Yes
GO:0035591	signaling adaptor activity	0.16354	No		0.000176076	Yes
GO:0032332	positive regulation of chondrocyte differentiation	0.164618	No		0.00285077	Yes
GO:0005072	transforming growth factor beta receptor, cytoplasmic mediator activity	0.168753	No		0.00393758	Yes
GO:0006913	nucleocytoplasmic transport	0.17556	No		0.00124859	Yes
GO:0032947	protein complex scaffold	0.176121	No		0.00237213	Yes
GO:0071375	cellular response to peptide hormone stimulus	0.177803	No		8.18606e-06	Yes
GO:0051169	nuclear transport	0.184115	No		0.00143106	Yes
GO:0005089	Rho guanyl-nucleotide exchange factor activity	0.186515	No		0.00146059	Yes
GO:0046620	regulation of organ growth	0.188872	No		0.00405268	Yes
GO:0051345	positive regulation of hydrolase activity	0.200665	No		0.00132863	Yes
GO:0032869	cellular response to insulin stimulus	0.210579	No		0.000541524	Yes
GO:0035102	PRC1 complex	0.234594	No		5.39568e-06	Yes
GO:0048469	cell maturation	0.238698	No		0.000336408	Yes
GO:0043425	bHLH transcription factor binding	0.250651	No		0.00324237	Yes
GO:0051348	negative regulation of transferase activity	0.264821	No		0.00451206	Yes
GO:0008286	insulin receptor signaling pathway	0.267274	No		0.00100675	Yes
GO:0004879	ligand-activated sequence-specific DNA binding RNA polymerase II transcription factor activity	0.2792	No		0.000260703	Yes
GO:0044087	regulation of cellular component biogenesis	0.34289	No		0.00338039	Yes
GO:0007264	small GTPase mediated signal transduction	0.35327	No		9.61753e-06	Yes
GO:0070491	repressing transcription factor binding	0.353413	No		0.00382275	Yes
GO:0071901	negative regulation of protein serine/threonine kinase activity	0.355552	No		0.00227879	Yes
GO:0003924	GTPase activity	0.363132	No		0.00393636	Yes
GO:0031519	PcG protein complex	0.376101	No		1.62317e-05	Yes
GO:0005088	Ras guanyl-nucleotide exchange factor activity	0.378778	No		0.00391958	Yes
GO:0005085	guanyl-nucleotide exchange factor activity	0.393795	No		0.00107831	Yes
GO:0009898	internal side of plasma membrane	0.407678	No		0.00448195	Yes
GO:0008289	lipid binding	0.415144	No		0.00452539	Yes
GO:0046965	retinoid X receptor binding	0.429419	No		0.00374877	Yes
GO:0005070	SH3/SH2 adaptor activity	0.443144	No		0.00154979	Yes
GO:0004702	receptor signaling protein serine/threonine kinase activity	0.449609	No		0.00383916	Yes
GO:0016585	chromatin remodeling complex	0.458532	No		0.000106445	Yes
GO:0008154	actin polymerization or depolymerization	0.461685	No		0.00149986	Yes
GO:0035023	regulation of Rho protein signal transduction	0.505462	No		0.00458654	Yes
GO:0000187	activation of MAPK activity	0.516075	No		0.00255687	Yes
GO:0005083	small GTPase regulator activity	0.522935	No		0.000491662	Yes
GO:0005545	1-phosphatidylinositol binding	0.555222	No		0.00234139	Yes
GO:0019897	extrinsic to plasma membrane	0.604512	No		0.000658206	Yes
GO:0060428	lung epithelium development	0.619374	No		0.00134504	Yes
GO:0046777	protein autophosphorylation	0.623908	No		0.000752236	Yes
GO:0005543	phospholipid binding	0.626328	No		0.000376606	Yes
GO:0035173	histone kinase activity	0.641458	No		0.00435088	Yes
GO:0017124	SH3 domain binding	0.644819	No		0.000134444	Yes
GO:0000287	magnesium ion binding	0.645512	No		0.000902264	Yes
GO:0060589	nucleoside-triphosphatase regulator activity	0.657791	No		5.64607e-05	Yes
GO:0004721	phosphoprotein phosphatase activity	0.694867	No		0.00109311	Yes
GO:0009894	regulation of catabolic process	0.711059	No		0.00101035	Yes
GO:0048011	nerve growth factor receptor signaling pathway	0.739373	No		8.6028e-06	Yes
GO:0030695	GTPase regulator activity	0.749165	No		0.000165	Yes
GO:0031329	regulation of cellular catabolic process	0.765662	No		0.00180973	Yes
GO:0005099	Ras GTPase activator activity	0.78867	No		0.000273973	Yes
GO:0051056	regulation of small GTPase mediated signal transduction	0.806214	No		3.56424e-05	Yes
GO:0030032	lamellipodium assembly	0.849415	No		0.00176533	Yes
GO:0030811	regulation of nucleotide catabolic process	0.869258	No		0.00277473	Yes
GO:0033121	regulation of purine nucleotide catabolic process	0.869258	No		0.00277473	Yes
GO:0008047	enzyme activator activity	0.882656	No		0.000502551	Yes
GO:0046578	regulation of Ras protein signal transduction	0.888387	No		0.000139854	Yes
GO:0016791	phosphatase activity	0.89739	No		0.000299152	Yes
GO:0042578	phosphoric ester hydrolase activity	0.90495	No		4.06758e-05	Yes
GO:0001727	lipid kinase activity	0.927485	No		0.00400057	Yes
GO:0060491	regulation of cell projection assembly	0.94042	No		0.00224976	Yes
GO:0006184	GTP catabolic process	0.946743	No		0.000969772	Yes
GO:0005096	GTPase activator activity	0.947137	No		0.000289628	Yes
GO:0090003	regulation of establishment of protein localization in plasma membrane	0.94742	No		0.00336255	Yes
GO:0004722	protein serine/threonine phosphatase activity	0.954517	No		0.00197598	Yes
GO:0046039	GTP metabolic process	0.954843	No		0.000566523	Yes
GO:0035091	phosphatidylinositol binding	0.970178	No		0.000421421	Yes
GO:0034134	toll-like receptor 2 signaling pathway	0.971484	No		0.00215085	Yes
GO:0004715	non-membrane spanning protein tyrosine kinase activity	0.972157	No		0.0022183	Yes
GO:0034130	toll-like receptor 1 signaling pathway	0.983758	No		0.00193869	Yes
GO:0002756	MyD88-independent toll-like receptor signaling pathway	0.988422	No		0.00126801	Yes
GO:0034138	toll-like receptor 3 signaling pathway	0.988906	No		0.00144725	Yes
GO:0008063	Toll signaling pathway	0.994716	No		0.00310537	Yes
GO:0034142	toll-like receptor 4 signaling pathway	0.995106	No		0.00248804	Yes
Mouse phenotype categories
MP ID	Term description	Nominal P value	False discovery rate < 5%		Nominal P value	False discovery rate < 5%
MP:0002135	abnormal kidney morphology	4.96292e-12	Yes		0.0062098	No
MP:0002190	disorganized myocardium	3.93535e-09	Yes		0.00341039	Yes
MP:0001792	impaired wound healing	9.99322e-09	Yes		0.0677567	No
MP:0001544	abnormal cardiovascular system physiology	1.32811e-08	Yes		0.000154807	Yes
MP:0006354	abnormal fourth branchial arch artery morphology	2.13526e-08	Yes		0.00182334	Yes
MP:0011501	increased glomerular capsule space	2.37443e-08	Yes		0.000919155	Yes
MP:0001614	abnormal blood vessel morphology	2.98012e-08	Yes		5.63351e-06	Yes
MP:0000477	abnormal intestine morphology	3.11747e-08	Yes		0.0144484	No
MP:0011098	complete embryonic lethality during organogenesis	3.14441e-08	Yes		7.38851e-11	Yes
MP:0001260	increased body weight	3.27939e-08	Yes		0.786819	No
MP:0000274	enlarged heart	3.69735e-08	Yes		9.70219e-05	Yes
MP:0003227	abnormal vascular branching morphogenesis	4.34242e-08	Yes		3.06033e-05	Yes
MP:0011086	partial postnatal lethality	4.50148e-08	Yes		0.000168987	Yes
MP:0005312	pericardial effusion	5.18062e-08	Yes		0.000126379	Yes
MP:0011109	partial lethality throughout fetal growth and development	6.39389e-08	Yes		3.22683e-07	Yes
MP:0005325	abnormal renal glomerulus morphology	7.81716e-08	Yes		0.00107505	Yes
MP:0002754	dilated heart right ventricle	8.86248e-08	Yes		0.0137752	No
MP:0010418	perimembraneous ventricular septal defect	9.71983e-08	Yes		0.045001	No
MP:0006144	increased systemic arterial systolic blood pressure	1.32206e-07	Yes		0.259341	No
MP:0006356	abnormal third branchial arch artery morphology	1.40188e-07	Yes		0.000719246	Yes
MP:0001914	hemorrhage	1.67583e-07	Yes		8.3739e-07	Yes
MP:0005264	glomerulosclerosis	2.29435e-07	Yes		0.000619014	Yes
MP:0003675	kidney cysts	2.43179e-07	Yes		0.000174764	Yes
MP:0001698	decreased embryo size	2.56936e-07	Yes		1.16936e-08	Yes
MP:0003921	abnormal heart left ventricle morphology	2.6179e-07	Yes		0.00144228	Yes
MP:0004076	abnormal vitelline vascular remodeling	2.74411e-07	Yes		0.000304157	Yes
MP:0011090	partial perinatal lethality	2.94929e-07	Yes		0.000479239	Yes
MP:0002113	abnormal skeleton development	3.0779e-07	Yes		0.0215307	No
MP:0000272	abnormal aorta morphology	3.1835e-07	Yes		0.0942597	No
MP:0002657	chondrodystrophy	3.28297e-07	Yes		0.00498421	No
MP:0004110	transposition of great arteries	3.62728e-07	Yes		0.0876315	No
MP:0003419	delayed endochondral bone ossification	3.88631e-07	Yes		0.0247104	No
MP:0005602	decreased angiogenesis	4.23896e-07	Yes		0.0243182	No
MP:0003229	abnormal vitelline vasculature morphology	4.65612e-07	Yes		1.17179e-08	Yes
MP:0000260	abnormal angiogenesis	4.68e-07	Yes		0.00158919	Yes
MP:0003984	embryonic growth retardation	4.80094e-07	Yes		1.37867e-08	Yes
MP:0002672	abnormal branchial arch artery morphology	5.53048e-07	Yes		0.00192524	Yes
MP:0003717	pallor	5.92591e-07	Yes		7.64373e-06	Yes
MP:0000445	short snout	6.06548e-07	Yes		0.00759492	No
MP:0001575	cyanosis	6.52382e-07	Yes		0.00703623	No
MP:0000440	domed cranium	6.54523e-07	Yes		0.0925547	No
MP:0002191	abnormal artery morphology	7.23561e-07	Yes		0.0551678	No
MP:0000292	distended pericardium	7.27456e-07	Yes		0.000137451	Yes
MP:0003641	small lung	7.57213e-07	Yes		0.021436	No
MP:0000266	abnormal heart morphology	8.03992e-07	Yes		6.41853e-07	Yes
MP:0004937	dilated heart	1.01439e-06	Yes		0.0702446	No
MP:0001732	postnatal growth retardation	1.0915e-06	Yes		6.54014e-05	Yes
MP:0001915	intracranial hemorrhage	1.10545e-06	Yes		0.000893181	Yes
MP:0001183	overexpanded pulmonary alveoli	1.16577e-06	Yes		0.203197	No
MP:0004686	decreased length of long bones	1.19046e-06	Yes		0.00400641	Yes
MP:0000063	decreased bone mineral density	1.22112e-06	Yes		0.0121598	No
MP:0004875	increased mean systemic arterial blood pressure	1.34095e-06	Yes		0.223193	No
MP:0001182	lung hemorrhage	1.46985e-06	Yes		0.082912	No
MP:0000163	abnormal cartilage morphology	1.48418e-06	Yes		0.0532999	No
MP:0003055	abnormal long bone epiphyseal plate morphology	1.49419e-06	Yes		0.00860091	No
MP:0010402	ventricular septal defect	1.70391e-06	Yes		0.0112134	No
MP:0004181	abnormal carotid artery morphology	1.75575e-06	Yes		0.0316596	No
MP:0003662	abnormal long bone epiphyseal plate proliferative zone	1.96899e-06	Yes		0.0609888	No
MP:0005244	hemopericardium	2.10572e-06	Yes		0.000151286	Yes
MP:0000231	hypertension	2.14786e-06	Yes		0.0969127	No
MP:0001954	respiratory distress	2.39208e-06	Yes		0.004773	Yes
MP:0006055	abnormal vascular endothelial cell morphology	2.52109e-06	Yes		0.00714671	No
MP:0002753	dilated heart left ventricle	3.08481e-06	Yes		0.00267379	Yes
MP:0001257	increased body length	3.10746e-06	Yes		0.576651	No
MP:0001312	abnormal cornea morphology	3.38364e-06	Yes		0.88703	No
MP:0001712	abnormal placenta development	3.63125e-06	Yes		0.0320966	No
MP:0002127	abnormal cardiovascular system morphology	4.26867e-06	Yes		0.0045758	Yes
MP:0005508	abnormal skeleton morphology	4.33949e-06	Yes		0.0013327	Yes
MP:0000522	kidney cortex cysts	4.4003e-06	Yes		0.00798174	No
MP:0004808	abnormal hematopoietic stem cell morphology	4.63418e-06	Yes		0.00883192	No
MP:0000273	overriding aorta	4.95042e-06	Yes		0.413044	No
MP:0005592	abnormal vascular smooth muscle morphology	5.00761e-06	Yes		1.48329e-06	Yes
MP:0001923	reduced female fertility	5.33729e-06	Yes		0.0765813	No
MP:0002705	dilated renal tubules	5.45923e-06	Yes		0.00161498	Yes
MP:0003827	abnormal Wolffian duct morphology	5.59573e-06	Yes		0.0272224	No
MP:0011099	complete lethality throughout fetal growth and development	5.68813e-06	Yes		4.2703e-07	Yes
MP:0000559	abnormal femur morphology	5.69445e-06	Yes		0.163688	No
MP:0003659	abnormal lymph circulation	6.56716e-06	Yes		0.0557383	No
MP:0002792	abnormal retinal vasculature morphology	6.60452e-06	Yes		0.0030061	Yes
MP:0002833	increased heart weight	6.76084e-06	Yes		8.71996e-05	Yes
MP:0004157	interrupted aortic arch	6.81358e-06	Yes		0.124564	No
MP:0003089	decreased skin tensile strength	6.99481e-06	Yes		0.880449	No
MP:0002192	hydrops fetalis	7.18181e-06	Yes		0.000153972	Yes
MP:0000003	abnormal adipose tissue morphology	7.24e-06	Yes		1.5199e-05	Yes
MP:0002968	increased circulating alkaline phosphatase level	7.3386e-06	Yes		0.0113147	No
MP:0000267	abnormal heart development	7.39945e-06	Yes		0.000121041	Yes
MP:0002962	increased urine protein level	7.81504e-06	Yes		0.00353658	Yes
MP:0001785	edema	8.27748e-06	Yes		2.77652e-05	Yes
MP:0005140	decreased cardiac muscle contractility	8.4525e-06	Yes		0.0230332	No
MP:0011108	partial embryonic lethality during organogenesis	8.46719e-06	Yes		1.45036e-08	Yes
MP:0004787	abnormal dorsal aorta morphology	8.52996e-06	Yes		2.98044e-05	Yes
MP:0001722	pale yolk sac	8.88766e-06	Yes		8.65205e-08	Yes
MP:0001625	cardiac hypertrophy	9.89209e-06	Yes		0.00846127	No
MP:0000484	abnormal pulmonary artery morphology	1.01153e-05	Yes		0.123614	No
MP:0003658	abnormal capillary morphology	1.01498e-05	Yes		0.000462013	Yes
MP:0001719	absent vitelline blood vessels	1.02839e-05	Yes		1.07262e-05	Yes
MP:0008438	abnormal cutaneous collagen fibril morphology	1.17948e-05	Yes		0.354979	No
MP:0001596	hypotension	1.19036e-05	Yes		0.00279136	Yes
MP:0000088	short mandible	1.19479e-05	Yes		0.0422448	No
MP:0003068	enlarged kidney	1.20853e-05	Yes		0.000503986	Yes
MP:0001718	abnormal visceral yolk sac morphology	1.27038e-05	Yes		0.000847367	Yes
MP:0000297	abnormal atrioventricular cushion morphology	1.34939e-05	Yes		0.132838	No
MP:0011101	partial prenatal lethality	1.41253e-05	Yes		0.000215386	Yes
MP:0006143	increased systemic arterial diastolic blood pressure	1.47634e-05	Yes		0.351287	No
MP:0002086	abnormal extraembryonic tissue morphology	1.50588e-05	Yes		0.000706626	Yes
MP:0002725	abnormal vein morphology	1.5064e-05	Yes		0.0001391	Yes
MP:0002703	abnormal renal tubule morphology	1.51812e-05	Yes		0.103967	No
MP:0009395	increased nucleated erythrocyte cell number	1.62953e-05	Yes		0.0596927	No
MP:0000164	abnormal cartilage development	1.73464e-05	Yes		0.04084	No
MP:0000010	abnormal abdominal fat pad morphology	1.74674e-05	Yes		0.104535	No
MP:0009890	cleft secondary palate	1.80642e-05	Yes		0.0063341	No
MP:0011353	expanded mesangial matrix	1.91022e-05	Yes		0.0321361	No
MP:0010403	atrial septal defect	2.00481e-05	Yes		0.0192162	No
MP:0002633	persistent truncus arteriosis	2.02981e-05	Yes		0.00297914	Yes
MP:0001926	female infertility	2.24672e-05	Yes		0.0260752	No
MP:0009780	abnormal chondrocyte physiology	2.32784e-05	Yes		0.0713526	No
MP:0004359	short ulna	2.51941e-05	Yes		0.109914	No
MP:0003231	abnormal placenta vasculature	2.63829e-05	Yes		0.000590449	Yes
MP:0002747	abnormal aortic valve morphology	2.70888e-05	Yes		0.495988	No
MP:0003057	abnormal epicardium morphology	2.79257e-05	Yes		0.404742	No
MP:0000141	abnormal vertebral body morphology	2.80333e-05	Yes		0.0740761	No
MP:0000131	abnormal long bone epiphysis morphology	2.87727e-05	Yes		0.0521833	No
MP:0004564	enlarged myocardial fiber	2.93061e-05	Yes		0.00402921	Yes
MP:0002128	abnormal blood circulation	2.94013e-05	Yes		0.00288817	Yes
MP:0004810	decreased hematopoietic stem cell number	2.97123e-05	Yes		0.0704942	No
MP:0002875	decreased erythrocyte cell number	3.04677e-05	Yes		0.0152332	No
MP:0003446	renal hypoplasia	3.19398e-05	Yes		0.00391997	Yes
MP:0000280	thin ventricular wall	3.26725e-05	Yes		0.00217245	Yes
MP:0003920	abnormal heart right ventricle morphology	3.38983e-05	Yes		0.277835	No
MP:0009866	abnormal aorta wall morphology	3.44125e-05	Yes		0.487334	No
MP:0002196	absent corpus callosum	3.56198e-05	Yes		0.307754	No
MP:0005608	cardiac interstitial fibrosis	3.71424e-05	Yes		0.00796521	No
MP:0000554	abnormal carpal bone morphology	3.79749e-05	Yes		0.000870634	Yes
MP:0009873	abnormal aorta tunica media morphology	3.88647e-05	Yes		0.387598	No
MP:0004351	short humerus	4.0645e-05	Yes		0.0592686	No
MP:0000598	abnormal liver morphology	4.23118e-05	Yes		0.0349758	No
MP:0000259	abnormal vascular development	4.26866e-05	Yes		4.7895e-06	Yes
MP:0005306	abnormal phalanx morphology	4.33112e-05	Yes		0.171184	No
MP:0001559	hyperglycemia	4.35332e-05	Yes		0.074291	No
MP:0002116	abnormal craniofacial bone morphology	4.44571e-05	Yes		3.19086e-05	Yes
MP:0002270	abnormal pulmonary alveolus morphology	4.57829e-05	Yes		0.00662056	No
MP:0000160	kyphosis	4.75286e-05	Yes		0.755713	No
MP:0000249	abnormal blood vessel physiology	4.95226e-05	Yes		0.00815018	No
MP:0003109	short femur	4.96736e-05	Yes		0.274186	No
MP:0000284	double outlet heart right ventricle	5.00223e-05	Yes		0.083319	No
MP:0003140	dilated heart atrium	5.01272e-05	Yes		0.00201123	Yes
MP:0009862	abnormal aorta elastic tissue morphology	5.12312e-05	Yes		0.299429	No
MP:0005331	insulin resistance	5.23984e-05	Yes		0.0125842	No
MP:0001716	abnormal placenta labyrinth morphology	5.24582e-05	Yes		1.91485e-06	Yes
MP:0004921	decreased placenta weight	5.25291e-05	Yes		0.000907198	Yes
MP:0000295	trabecula carnea hypoplasia	5.3122e-05	Yes		4.27989e-05	Yes
MP:0000536	hydroureter	5.32106e-05	Yes		0.0261417	No
MP:0004988	increased osteoblast cell number	5.4034e-05	Yes		0.0575749	No
MP:0004007	abnormal lung vasculature morphology	5.68311e-05	Yes		0.0670551	No
MP:0001636	irregular heartbeat	5.77125e-05	Yes		0.0734801	No
MP:0008803	abnormal placental labyrinth vasculature morphology	5.83506e-05	Yes		2.22672e-05	Yes
MP:0003352	increased circulating renin level	5.88703e-05	Yes		0.0722627	No
MP:0002759	abnormal caudal vertebrae morphology	6.09043e-05	Yes		0.00871951	No
MP:0000161	scoliosis	6.13888e-05	Yes		0.0373936	No
MP:0002108	abnormal muscle morphology	6.62009e-05	Yes		0.31424	No
MP:0010019	liver vascular congestion	6.93946e-05	Yes		0.307385	No
MP:0005333	decreased heart rate	7.26359e-05	Yes		0.204187	No
MP:0004607	abnormal cervical atlas morphology	7.55347e-05	Yes		0.000402665	Yes
MP:0002626	increased heart rate	7.65604e-05	Yes		0.314112	No
MP:0003073	abnormal metacarpal bone morphology	7.74122e-05	Yes		0.0930013	No
MP:0006126	abnormal outflow tract development	7.92442e-05	Yes		0.21638	No
MP:0000230	abnormal systemic arterial blood pressure	7.94841e-05	Yes		0.110199	No
MP:0000281	abnormal interventricular septum morphology	7.98846e-05	Yes		0.131354	No
MP:0008271	abnormal bone ossification	8.15387e-05	Yes		0.0764238	No
MP:0004355	short radius	8.26898e-05	Yes		0.0786014	No
MP:0010103	small thoracic cage	8.77591e-05	Yes		0.0318233	No
MP:0011092	complete embryonic lethality	9.02253e-05	Yes		5.31143e-05	Yes
MP:0001613	abnormal vasodilation	9.49834e-05	Yes		0.525833	No
MP:0001303	abnormal lens morphology	9.64335e-05	Yes		0.030075	No
MP:0000060	delayed bone ossification	9.70937e-05	Yes		0.0504714	No
MP:0004200	decreased fetal size	9.82536e-05	Yes		0.00635029	No
MP:0000069	kyphoscoliosis	0.000102133	Yes		0.0227582	No
MP:0000024	lowered ear position	0.00010328	Yes		0.174243	No
MP:0003648	abnormal radial glial cell morphology	0.000106704	Yes		0.566796	No
MP:0002932	abnormal joint morphology	0.00010679	Yes		0.241198	No
MP:0000428	abnormal craniofacial morphology	0.000107553	Yes		0.00671271	No
MP:0004883	abnormal vascular wound healing	0.000112418	Yes		0.142177	No
MP:0004624	abnormal thoracic cage morphology	0.000118293	Yes		0.695739	No
MP:0000530	abnormal kidney blood vessel morphology	0.00011845	Yes		0.000259809	Yes
MP:0002637	small uterus	0.000120179	Yes		0.0811639	No
MP:0005048	thrombosis	0.000120774	Yes		0.207178	No
MP:0002115	abnormal limb bone morphology	0.000129242	Yes		0.0280459	No
MP:0006398	increased long bone epiphyseal plate size	0.000129913	Yes		0.544383	No
MP:0000165	abnormal long bone hypertrophic chondrocyte zone	0.000133197	Yes		0.197714	No
MP:0002625	heart left ventricle hypertrophy	0.000141255	Yes		0.0634243	No
MP:0009404	centrally nucleated skeletal muscle fibers	0.000143625	Yes		0.235019	No
MP:0002161	abnormal fertility/fecundity	0.000144192	Yes		0.574401	No
MP:0005202	lethargy	0.000152016	Yes		0.00806821	No
MP:0002795	dilated cardiomyopathy	0.000155936	Yes		0.0221596	No
MP:0001634	internal hemorrhage	0.000158073	Yes		0.000410881	Yes
MP:0002092	abnormal eye morphology	0.000158077	Yes		0.89407	No
MP:0000462	abnormal digestive system morphology	0.000168752	Yes		0.778235	No
MP:0003400	kinked neural tube	0.000169349	Yes		0.00746901	No
MP:0005503	abnormal tendon morphology	0.000173298	Yes		0.828482	No
MP:0001297	microphthalmia	0.000175136	Yes		0.0791883	No
MP:0004086	absent heartbeat	0.000175171	Yes		0.00329592	Yes
MP:0002746	abnormal semilunar valve morphology	0.000178578	Yes		0.26786	No
MP:0006138	congestive heart failure	0.00017931	Yes		0.0418938	No
MP:0000109	abnormal parietal bone morphology	0.000185546	Yes		0.147429	No
MP:0001245	thick dermal layer	0.000185647	Yes		0.716024	No
MP:0005587	abnormal Meckel's cartilage morphology	0.00018947	Yes		0.417298	No
MP:0002764	short tibia	0.000189789	Yes		0.0414458	No
MP:0002189	abnormal myocardial trabeculae morphology	0.000192865	Yes		8.84643e-06	Yes
MP:0000276	heart right ventricle hypertrophy	0.000200182	Yes		0.140021	No
MP:0006264	decreased systemic arterial systolic blood pressure	0.000207087	Yes		0.0258931	No
MP:0006027	impaired lung alveolus development	0.000210353	Yes		0.000342457	Yes
MP:0006344	small second branchial arch	0.000229051	Yes		0.00157156	Yes
MP:0002842	increased systemic arterial blood pressure	0.000232991	Yes		0.0407721	No
MP:0004056	abnormal myocardium compact layer morphology	0.000235353	Yes		0.0512846	No
MP:0000521	abnormal kidney cortex morphology	0.000237606	Yes		0.0314057	No
MP:0000013	abnormal adipose tissue distribution	0.000245621	Yes		0.0643804	No
MP:0002724	enhanced wound healing	0.000246504	Yes		0.471873	No
MP:0004509	abnormal pelvic girdle bone morphology	0.000253284	Yes		0.123841	No
MP:0002998	abnormal bone remodeling	0.000253876	Yes		0.749768	No
MP:0003120	abnormal tracheal cartilage morphology	0.000266012	Yes		0.303975	No
MP:0005542	corneal vascularization	0.000274141	Yes		0.339698	No
MP:0000364	abnormal vascular regression	0.000275075	Yes		1.07733e-05	Yes
MP:0003566	abnormal cell adhesion	0.00028186	Yes		2.00118e-05	Yes
MP:0006341	small first branchial arch	0.000287127	Yes		0.000982988	Yes
MP:0001958	emphysema	0.00028826	Yes		0.104107	No
MP:0002110	abnormal digit morphology	0.000290284	Yes		0.0172264	No
MP:0008140	podocyte foot process effacement	0.000290792	Yes		0.0190512	No
MP:0001429	dehydration	0.000292927	Yes		0.53114	No
MP:0000285	abnormal heart valve morphology	0.000296624	Yes		0.307878	No
MP:0004471	short nasal bone	0.000299569	Yes		0.00399346	Yes
MP:0005553	increased circulating creatinine level	0.000313742	Yes		0.0085969	No
MP:0002953	thick ventricular wall	0.000314514	Yes		0.00107055	Yes
MP:0001762	polyuria	0.000315966	Yes		0.030486	No
MP:0005329	abnormal myocardium layer morphology	0.000317746	Yes		0.00437363	Yes
MP:0005566	decreased blood urea nitrogen level	0.000318107	Yes		0.022725	No
MP:0002188	small heart	0.000327823	Yes		0.0269756	No
MP:0000527	abnormal kidney development	0.000329577	Yes		0.0022717	Yes
MP:0003141	cardiac fibrosis	0.000332541	Yes		0.0423097	No
MP:0001289	persistence of hyaloid vascular system	0.000335759	Yes		0.0144097	No
MP:0011089	complete perinatal lethality	0.000335871	Yes		0.0289616	No
MP:0003215	renal interstitial fibrosis	0.000340596	Yes		0.250456	No
MP:0005157	holoprosencephaly	0.000341175	Yes		0.104312	No
MP:0000516	abnormal renal/urinary system morphology	0.000348886	Yes		0.0100583	No
MP:0000097	short maxilla	0.000353252	Yes		0.00406217	Yes
MP:0004272	abnormal basement membrane morphology	0.000353283	Yes		0.00329856	Yes
MP:0001577	anemia	0.000386623	Yes		0.000183577	Yes
MP:0005152	pancytopenia	0.00038704	Yes		0.000448612	Yes
MP:0003091	abnormal cell migration	0.000390758	Yes		7.28859e-05	Yes
MP:0004933	abnormal epididymis epithelium morphology	0.000390928	Yes		0.0157795	No
MP:0003131	increased erythrocyte cell number	0.00039173	Yes		0.157553	No
MP:0001304	cataracts	0.000411463	Yes		0.107133	No
MP:0003139	patent ductus arteriosus	0.000419795	Yes		0.0225568	No
MP:0003050	abnormal sacral vertebrae morphology	0.000425357	Yes		0.00502907	No
MP:0005435	hemoperitoneum	0.000432978	Yes		0.0182685	No
MP:0001622	abnormal vasculogenesis	0.000438327	Yes		0.0858028	No
MP:0003560	osteoarthritis	0.000446606	Yes		0.083839	No
MP:0001314	corneal opacity	0.00045383	Yes		0.310223	No
MP:0000208	decreased hematocrit	0.000454219	Yes		0.0598742	No
MP:0011091	complete prenatal lethality	0.000454997	Yes		0.00460795	Yes
MP:0001270	distended abdomen	0.000474645	Yes		0.0225372	No
MP:0009414	skeletal muscle fiber necrosis	0.00047667	Yes		0.510492	No
MP:0000547	short limbs	0.000479396	Yes		0.0408491	No
MP:0000120	malocclusion	0.000482776	Yes		0.0185873	No
MP:0002908	delayed wound healing	0.000495943	Yes		0.934916	No
MP:0004938	dilated vasculature	0.000496801	Yes		0.0755856	No
MP:0000078	abnormal supraoccipital bone morphology	0.000499394	Yes		0.14129	No
MP:0006355	abnormal sixth branchial arch artery morphology	0.00050242	Yes		0.000557454	Yes
MP:0002168	other aberrant phenotype	0.000518787	Yes		0.12953	No
MP:0002160	abnormal reproductive system morphology	0.000528706	Yes		0.0111294	No
MP:0004016	decreased bone mass	0.000542189	Yes		0.159005	No
MP:0003974	abnormal endocardium morphology	0.000543376	Yes		0.0385822	No
MP:0000278	abnormal myocardial fiber morphology	0.000548585	Yes		0.00143316	Yes
MP:0005352	small cranium	0.000562502	Yes		0.350651	No
MP:0011405	tubulointerstitial nephritis	0.000571218	Yes		0.151494	No
MP:0001723	disorganized yolk sac vascular plexus	0.000582496	Yes		0.00672235	No
MP:0001261	obese	0.000582734	Yes		0.844216	No
MP:0010876	decreased bone volume	0.00058443	Yes		0.0229587	No
MP:0004809	increased hematopoietic stem cell number	0.000587243	Yes		0.155396	No
MP:0002652	thin myocardium	0.00059012	Yes		2.00478e-07	Yes
MP:0011087	complete neonatal lethality	0.000591491	Yes		0.15872	No
MP:0010099	abnormal thoracic cage shape	0.000603095	Yes		0.65569	No
MP:0006346	small branchial arch	0.000605496	Yes		0.355163	No
MP:0003209	abnormal pulmonary elastic fiber morphology	0.000607305	Yes		0.0070645	No
MP:0001935	decreased litter size	0.000615549	Yes		0.0237219	No
MP:0010024	increased total body fat amount	0.000623866	Yes		0.738116	No
MP:0000600	liver hypoplasia	0.000635064	Yes		1.96429e-05	Yes
MP:0000167	decreased chondrocyte cell number	0.000643573	Yes		0.291968	No
MP:0002575	increased circulating ketone body level	0.000648414	Yes		0.219309	No
MP:0002891	increased insulin sensitivity	0.000659649	Yes		0.0172437	No
MP:0003723	abnormal long bone morphology	0.000670022	Yes		0.0305756	No
MP:0005559	increased circulating glucose level	0.000670326	Yes		0.273908	No
MP:0003105	abnormal heart atrium morphology	0.000681411	Yes		0.00728076	No
MP:0003355	decreased ovulation rate	0.000696012	Yes		0.167874	No
MP:0001176	abnormal lung development	0.000699076	Yes		0.00428239	Yes
MP:0001606	impaired hematopoiesis	0.000703986	Yes		0.000793733	Yes
MP:0011085	complete postnatal lethality	0.000714237	Yes		0.284983	No
MP:0000166	abnormal chondrocyte morphology	0.000730421	Yes		0.00590507	No
MP:0004462	small basisphenoid bone	0.000759809	Yes		0.131458	No
MP:0004485	increased response of heart to induced stress	0.000763258	Yes		0.00280069	Yes
MP:0003795	abnormal bone structure	0.000767581	Yes		0.00728086	No
MP:0006117	aortic valve stenosis	0.000797887	Yes		0.000776268	Yes
MP:0000159	abnormal xiphoid process morphology	0.000819943	Yes		0.394048	No
MP:0002282	abnormal trachea morphology	0.000828281	Yes		0.482036	No
MP:0005598	decreased ventricle muscle contractility	0.000842138	Yes		0.000428399	Yes
MP:0003393	decreased cardiac output	0.000857873	Yes		0.0731963	No
MP:0000293	absent myocardial trabeculae	0.000871603	Yes		0.120476	No
MP:0010090	increased circulating creatine kinase level	0.000890566	Yes		0.642964	No
MP:0010701	fusion of atlas and odontoid process	0.000899773	Yes		7.40155e-05	Yes
MP:0001721	absent visceral yolk sac blood islands	0.000907543	Yes		0.0174342	No
MP:0000066	osteoporosis	0.000913217	Yes		0.000231288	Yes
MP:0001177	atelectasis	0.000946627	Yes		0.013045	No
MP:0008770	decreased survivor rate	0.000949776	Yes		0.0541885	No
MP:0004204	absent stapes	0.000959332	Yes		0.00731336	No
MP:0010025	decreased total body fat amount	0.000963453	Yes		0.00695911	No
MP:0002427	disproportionate dwarf	0.000980498	Yes		0.0991719	No
MP:0005296	abnormal humerus morphology	0.000993343	Yes		0.0953204	No
MP:0009403	increased variability of skeletal muscle fiber size	0.000997607	Yes		0.566153	No
MP:0002929	abnormal bile duct development	0.000998809	Yes		0.031838	No
MP:0002085	abnormal embryonic tissue morphology	0.00101011	Yes		0.0472168	No
MP:0006267	abnormal intercalated disc morphology	0.00103313	Yes		0.00306746	Yes
MP:0004148	increased compact bone thickness	0.00103947	Yes		0.095989	No
MP:0004756	abnormal proximal convoluted tubule morphology	0.00104131	Yes		0.252347	No
MP:0001175	abnormal lung morphology	0.00106299	Yes		0.076392	No
MP:0004215	abnormal myocardial fiber physiology	0.00107214	Yes		0.276227	No
MP:0004423	abnormal squamosal bone morphology	0.00107308	Yes		0.0120937	No
MP:0002314	abnormal respiratory mechanics	0.00108204	Yes		0.654683	No
MP:0000520	absent kidney	0.00108282	Yes		0.116767	No
MP:0000291	enlarged pericardium	0.00108949	Yes		0.00100606	Yes
MP:0001554	increased circulating free fatty acid level	0.00110354	Yes		0.0487914	No
MP:0010124	decreased bone mineral content	0.00110933	Yes		0.127719	No
MP:0000460	mandible hypoplasia	0.00111911	Yes		0.0858594	No
MP:0008395	abnormal osteoblast differentiation	0.00112014	Yes		0.118821	No
MP:0004567	decreased myocardial fiber number	0.00113148	Yes		0.0165183	No
MP:0011088	partial neonatal lethality	0.00113516	Yes		0.0180673	No
MP:0003935	abnormal craniofacial development	0.00113822	Yes		0.000891703	Yes
MP:0001306	small lens	0.00114246	Yes		0.013288	No
MP:0001944	abnormal pancreas morphology	0.00116665	Yes		0.920056	No
MP:0004057	thin myocardium compact layer	0.00117145	Yes		0.00260208	Yes
MP:0000250	abnormal vasoconstriction	0.00119672	Yes		0.354183	No
MP:0004251	failure of heart looping	0.00121544	Yes		9.36434e-08	Yes
MP:0011423	kidney cortex atrophy	0.00121953	Yes		0.016595	No
MP:0001178	pulmonary hypoplasia	0.0012608	Yes		0.278797	No
MP:0001179	thick pulmonary interalveolar septum	0.00127957	Yes		0.0142822	No
MP:0000784	forebrain hypoplasia	0.00131964	Yes		0.289029	No
MP:0004084	abnormal cardiac muscle relaxation	0.00138058	Yes		0.0516149	No
MP:0000601	small liver	0.0013882	Yes		0.00315883	Yes
MP:0008525	decreased cranium height	0.00140199	Yes		0.0630601	No
MP:0000534	abnormal ureter morphology	0.00140675	Yes		0.0869008	No
MP:0003044	impaired basement membrane formation	0.001411	Yes		0.0388685	No
MP:0005599	increased cardiac muscle contractility	0.00142151	Yes		0.164624	No
MP:0004321	short sternum	0.0014857	Yes		0.982623	No
MP:0003179	decreased platelet cell number	0.00151772	Yes		0.0317113	No
MP:0004936	impaired branching involved in ureteric bud morphogenesis	0.00152428	Yes		0.00349503	Yes
MP:0002699	abnormal vitreous body morphology	0.00153384	Yes		0.463946	No
MP:0011346	renal tubule atrophy	0.00154762	Yes		0.41515	No
MP:0005669	increased circulating leptin level	0.00159247	Yes		0.768042	No
MP:0009406	decreased skeletal muscle fiber number	0.00159492	Yes		0.18524	No
MP:0002187	abnormal fibula morphology	0.00160604	Yes		0.179397	No
MP:0005565	increased blood urea nitrogen level	0.00161825	Yes		0.0477017	No
MP:0003710	abnormal physiological neovascularization	0.00161936	Yes		0.00273272	Yes
MP:0009703	decreased birth body size	0.00165736	Yes		0.00441046	Yes
MP:0005029	abnormal amnion morphology	0.00168811	Yes		0.154293	No
MP:0003084	abnormal skeletal muscle fiber morphology	0.00168971	Yes		0.3345	No
MP:0005440	increased glycogen level	0.00169023	Yes		0.0248345	No
MP:0000519	hydronephrosis	0.00170313	Yes		0.00724051	No
MP:0010856	dilated respiratory conducting tubes	0.00170856	Yes		0.217933	No
MP:0006280	abnormal digit development	0.0017102	Yes		0.200661	No
MP:0010392	prolonged QRS complex duration	0.00171462	Yes		0.0320234	No
MP:0000150	abnormal rib morphology	0.00172302	Yes		0.08379	No
MP:0009050	dilated proximal convoluted tubules	0.00172623	Yes		0.299518	No
MP:0000492	abnormal rectum morphology	0.00173518	Yes		0.743037	No
MP:0005353	abnormal patella morphology	0.00175358	Yes		0.088162	No
MP:0002079	increased circulating insulin level	0.0017542	Yes		0.349323	No
MP:0000538	abnormal urinary bladder morphology	0.00181878	Yes		0.852584	No
MP:0001759	increased urine glucose level	0.00182577	Yes		0.0645545	No
MP:0011348	abnormal renal glomerulus basement membrane morphology	0.00183866	Yes		0.36959	No
MP:0002177	abnormal outer ear morphology	0.00185411	Yes		0.012056	No
MP:0009642	abnormal blood homeostasis	0.00186638	Yes		0.0391712	No
MP:0006270	abnormal mammary gland growth during lactation	0.0018805	Yes		0.58469	No
MP:0000130	abnormal trabecular bone morphology	0.00189248	Yes		0.0336668	No
MP:0001879	abnormal lymphatic vessel morphology	0.00190041	Yes		0.210123	No
MP:0009640	abnormal renal tubule epithelium morphology	0.00192816	Yes		0.594178	No
MP:0001426	polydipsia	0.00194628	Yes		0.000963192	Yes
MP:0004111	abnormal coronary artery morphology	0.0019932	Yes		0.0703667	No
MP:0003719	abnormal pericyte morphology	0.00201988	Yes		0.0974321	No
MP:0000644	dextrocardia	0.00205144	Yes		0.804001	No
MP:0006382	abnormal lung epithelium morphology	0.00208533	Yes		0.833955	No
MP:0001651	necrosis	0.00211404	Yes		0.00143578	Yes
MP:0003056	abnormal hyoid bone morphology	0.00214857	Yes		0.0460622	No
MP:0000296	absent trabeculae carneae	0.00218777	Yes		0.0240562	No
MP:0001258	decreased body length	0.00220604	Yes		0.36903	No
MP:0010029	abnormal basicranium morphology	0.00222432	Yes		0.104751	No
MP:0010378	increased respiratory quotient	0.00225272	Yes		0.0509047	No
MP:0003178	left pulmonary isomerism	0.00226302	Yes		0.38794	No
MP:0002078	abnormal glucose homeostasis	0.00228574	Yes		0.0394606	No
MP:0003233	prolonged QT interval	0.00230269	Yes		0.107785	No
MP:0004981	decreased neuronal precursor cell number	0.00243954	Yes		0.659818	No
MP:0009660	abnormal induced retinal neovascularization	0.00246584	Yes		0.102842	No
MP:0002089	abnormal postnatal growth/weight/body size	0.00247175	Yes		0.164575	No
MP:0008943	increased sensitivity to induced cell death	0.00248876	Yes		0.841651	No
MP:0006397	disorganized long bone epiphyseal plate	0.00249522	Yes		0.135018	No
MP:0005630	increased lung weight	0.00254932	Yes		0.232378	No
MP:0003909	increased eating behavior	0.00258372	Yes		0.826103	No
MP:0011204	abnormal visceral yolk sac blood island morphology	0.00259135	Yes		0.208232	No
MP:0000596	abnormal liver development	0.00262432	Yes		0.000751547	Yes
MP:0010420	muscular ventricular septal defect	0.00269678	Yes		0.000494744	Yes
MP:0000458	abnormal mandible morphology	0.00271676	Yes		0.082643	No
MP:0003026	decreased vasoconstriction	0.00274099	Yes		0.112733	No
MP:0002871	albuminuria	0.00275453	Yes		0.201384	No
MP:0005293	impaired glucose tolerance	0.00281872	Yes		0.0882597	No
MP:0003924	herniated diaphragm	0.00282566	Yes		0.0390874	No
MP:0001927	abnormal estrous cycle	0.00285341	Yes		0.155152	No
MP:0004158	right aortic arch	0.00288221	Yes		0.839786	No
MP:0002925	abnormal cardiovascular development	0.00293606	Yes		0.0532538	No
MP:0001071	abnormal facial nerve morphology	0.00297079	Yes		0.0257135	No
MP:0011100	complete preweaning lethality	0.0029708	Yes		0.0825613	No
MP:0000416	sparse hair	0.00306703	Yes		0.159051	No
MP:0004672	short ribs	0.00309901	Yes		0.174442	No
MP:0000757	herniated abdominal wall	0.0031376	Yes		0.949371	No
MP:0000550	abnormal forelimb morphology	0.00315195	Yes		0.0168018	No
MP:0005601	increased angiogenesis	0.00315297	Yes		0.406964	No
MP:0010551	abnormal coronary vessel morphology	0.00325391	Yes		0.0552595	No
MP:0008725	enlarged heart atrium	0.00327934	Yes		0.0469806	No
MP:0005220	abnormal exocrine pancreas morphology	0.00328494	Yes		0.718516	No
MP:0004322	abnormal sternebra morphology	0.00329735	Yes		0.0721442	No
MP:0004003	abnormal vascular endothelial cell physiology	0.00335099	Yes		0.38718	No
MP:0009264	failure of eyelid fusion	0.00335157	Yes		0.620276	No
MP:0009431	decreased fetal weight	0.00335794	Yes		0.0381742	No
MP:0001552	increased circulating triglyceride level	0.00336908	Yes		0.293665	No
MP:0004221	abnormal iridocorneal angle	0.00337671	Yes		0.16626	No
MP:0003606	kidney failure	0.00339392	Yes		0.0115913	No
MP:0006395	abnormal epiphyseal plate morphology	0.00341856	Yes		0.020769	No
MP:0008869	anovulation	0.00344044	Yes		0.144589	No
MP:0008788	abnormal fetal cardiomyocyte morphology	0.00354615	Yes		0.0529932	No
MP:0005418	abnormal circulating hormone level	0.00356828	Yes		0.0614518	No
MP:0009133	decreased white fat cell size	0.00358025	Yes		0.00218034	Yes
MP:0005236	abnormal olfactory nerve morphology	0.00360648	Yes		0.475067	No
MP:0003420	delayed intramembranous bone ossification	0.00362245	Yes		0.689369	No
MP:0010900	abnormal pulmonary interalveolar septum morphology	0.00371737	Yes		0.00082149	Yes
MP:0001208	blistering	0.00390795	Yes		0.820032	No
MP:0006337	abnormal first branchial arch morphology	0.00393524	Yes		0.000182545	Yes
MP:0004860	dilated kidney collecting duct	0.00394318	Yes		0.0739953	No
MP:0002276	abnormal lung interstitium morphology	0.00395931	Yes		0.0784801	No
MP:0003402	decreased liver weight	0.00398628	Yes		0.11379	No
MP:0005104	abnormal tarsal bone morphology	0.00399813	Yes		0.0471559	No
MP:0009171	enlarged pancreatic islets	0.00402455	Yes		0.765678	No
MP:0004970	kidney atrophy	0.00404355	Yes		0.506211	No
MP:0004969	pale kidney	0.00404496	Yes		3.96915e-05	Yes
MP:0009399	increased skeletal muscle fiber size	0.00406054	Yes		0.239443	No
MP:0001689	incomplete somite formation	0.00416795	Yes		0.00104617	Yes
MP:0000106	abnormal basisphenoid bone morphology	0.00421272	Yes		0.104343	No
MP:0000111	cleft palate	0.00422789	Yes		0.0420655	No
MP:0004184	abnormal baroreceptor physiology	0.00424295	Yes		0.45599	No
MP:0003396	abnormal embryonic hematopoiesis	0.00447245	No		3.25051e-06	Yes
MP:0001633	poor circulation	0.00469667	No		2.67208e-05	Yes
MP:0000729	abnormal myogenesis	0.00472282	No		0.00322744	Yes
MP:0001711	abnormal placenta morphology	0.00618328	No		4.21688e-09	Yes
MP:0002151	abnormal neural tube morphology/development	0.00627591	No		0.00105175	Yes
MP:0002989	small kidney	0.00666174	No		0.00334267	Yes
MP:0004255	abnormal spongiotrophoblast layer morphology	0.00669488	No		0.000118722	Yes
MP:0008478	increased spleen white pulp amount	0.00675374	No		0.0044418	Yes
MP:0002059	abnormal seminal vesicle morphology	0.00721896	No		0.00157863	Yes
MP:0002928	abnormal bile duct morphology	0.0072307	No		2.58946e-05	Yes
MP:0001730	embryonic growth arrest	0.00785817	No		0.000748412	Yes
MP:0000914	exencephaly	0.00874527	No		0.00173595	Yes
MP:0005618	decreased urine potassium level	0.00921397	No		0.00375729	Yes
MP:0005105	abnormal middle ear ossicle morphology	0.00948612	No		0.00267164	Yes
MP:0005262	coloboma	0.0109475	No		0.0020594	Yes
MP:0002769	abnormal vas deferens morphology	0.0112129	No		0.000366865	Yes
MP:0005031	abnormal trophoblast layer morphology	0.0173146	No		0.00459194	Yes
MP:0000137	abnormal vertebrae morphology	0.0174911	No		0.00333981	Yes
MP:0002651	abnormal sciatic nerve morphology	0.0176	No		2.75045e-05	Yes
MP:0009885	abnormal palatal shelf elevation	0.0188019	No		0.0011359	Yes
MP:0005108	abnormal ulna morphology	0.0190447	No		0.00107138	Yes
MP:0003048	abnormal cervical vertebrae morphology	0.019242	No		0.00234553	Yes
MP:0002631	abnormal epididymis morphology	0.0237772	No		0.00457697	Yes
MP:0005033	abnormal trophoblast giant cells	0.0273575	No		0.0031031	Yes
MP:0005491	pancreatic islet hyperplasia	0.0277268	No		0.00205622	Yes
MP:0003036	vertebral transformation	0.0291809	No		0.00302046	Yes
MP:0002884	abnormal branchial arch morphology	0.0354534	No		2.85564e-07	Yes
MP:0001787	pericardial edema	0.0378466	No		4.76106e-07	Yes
MP:0002088	abnormal embryonic growth/weight/body size	0.0414921	No		0.000465623	Yes
MP:0009593	absent chorion	0.044199	No		0.0035679	Yes
MP:0000358	abnormal cell morphology	0.0451547	No		5.88304e-05	Yes
MP:0000091	short premaxilla	0.0483875	No		0.00335438	Yes
MP:0000270	abnormal heart tube morphology	0.0496066	No		0.00151954	Yes
MP:0003542	abnormal vascular endothelial cell development	0.05538	No		0.00337071	Yes
MP:0004617	sacral vertebral transformation	0.0702594	No		0.00256395	Yes
MP:0002843	decreased systemic arterial blood pressure	0.0771682	No		0.000857094	Yes
MP:0001119	abnormal female reproductive system morphology	0.07915	No		0.00182933	Yes
MP:0005076	abnormal cell differentiation	0.0791988	No		0.000636127	Yes
MP:0004259	small placenta	0.0821118	No		0.00183623	Yes
MP:0000930	wavy neural tube	0.0883077	No		6.1515e-07	Yes
MP:0000432	abnormal head morphology	0.0888314	No		0.000146726	Yes
MP:0001515	abnormal grip strength	0.0892704	No		0.00258717	Yes
MP:0008000	increased ovary tumor incidence	0.0907118	No		0.00361317	Yes
MP:0000662	abnormal branching of the mammary ductal tree	0.0907287	No		0.00416075	Yes
MP:0003232	abnormal forebrain development	0.101009	No		0.00133006	Yes
MP:0000928	incomplete cephalic closure	0.139645	No		0.000432062	Yes
MP:0004616	lumbar vertebral transformation	0.149638	No		0.00151071	Yes
MP:0000929	open neural tube	0.165786	No		0.00123968	Yes
MP:0006142	abnormal sinoatrial node conduction	0.16769	No		0.00209833	Yes
MP:0004615	cervical vertebral transformation	0.173073	No		0.000325465	Yes
MP:0004618	thoracic vertebral transformation	0.185223	No		0.00412807	Yes
MP:0001148	enlarged testis	0.205319	No		0.00207479	Yes
MP:0004486	decreased response of heart to induced stress	0.211152	No		0.0002238	Yes
MP:0011260	abnormal head mesenchyme morphology	0.237576	No		0.00106326	Yes
MP:0008470	abnormal spleen B cell follicle morphology	0.251968	No		0.000421175	Yes
MP:0008208	decreased pro-B cell number	0.298281	No		8.80906e-05	Yes
MP:0004185	abnormal adipocyte glucose uptake	0.320431	No		0.00021402	Yes
MP:0004136	abnormal tongue muscle morphology	0.347339	No		0.00329094	Yes
MP:0006262	testis tumor	0.574401	No		0.0038311	Yes
MP:0006086	decreased body mass index	0.854643	No		0.00315591	Yes
MP:0000471	abnormal stomach epithelium morphology	0.888779	No		0.00456608	Yes
Protein-protein interaction subnetworks
Ensembl gene ID	PPI subnetwork	Nominal P value	False discovery rate < 5%		Nominal P value	False discovery rate < 5%
ENSG00000142798	HSPG2 subnetwork	2.23837e-09	Yes		0.0359004	No
ENSG00000137332	DDR1 subnetwork	3.40839e-08	Yes		0.00544693	No
ENSG00000204580	DDR1 subnetwork	3.40839e-08	Yes		0.00544693	No
ENSG00000215522	DDR1 subnetwork	3.40839e-08	Yes		0.00544693	No
ENSG00000100985	MMP9 subnetwork	5.91771e-08	Yes		0.0325867	No
ENSG00000081052	COL4A4 subnetwork	1.37017e-07	Yes		0.132063	No
ENSG00000198959	TGM2 subnetwork	1.8234e-07	Yes		0.0101065	No
ENSG00000188153	COL4A5 subnetwork	1.90118e-07	Yes		0.072951	No
ENSG00000213949	ITGA1 subnetwork	2.33573e-07	Yes		0.000363135	Yes
ENSG00000101680	LAMA1 subnetwork	3.04956e-07	Yes		4.66897e-06	Yes
ENSG00000163520	FBLN2 subnetwork	5.05961e-07	Yes		0.0414667	No
ENSG00000166147	FBN1 subnetwork	1.2093e-06	Yes		0.982496	No
ENSG00000125084	WNT1 subnetwork	1.27706e-06	Yes		0.00316809	Yes
ENSG00000077942	FBLN1 subnetwork	1.37182e-06	Yes		0.000674848	Yes
ENSG00000078061	ARAF subnetwork	1.40164e-06	Yes		0.00293361	Yes
ENSG00000150093	ITGB1 subnetwork	1.62582e-06	Yes		9.05518e-10	Yes
ENSG00000134871	COL4A2 subnetwork	1.78785e-06	Yes		0.00157959	Yes
ENSG00000166033	HTRA1 subnetwork	1.90613e-06	Yes		3.0393e-05	Yes
ENSG00000119699	TGFB3 subnetwork	2.68406e-06	Yes		0.625069	No
ENSG00000128052	KDR subnetwork	3.30468e-06	Yes		0.00194879	Yes
ENSG00000053918	KCNQ1 subnetwork	3.79774e-06	Yes		0.0343826	No
ENSG00000116962	NID1 subnetwork	3.87439e-06	Yes		0.022855	No
ENSG00000169031	COL4A3 subnetwork	3.98093e-06	Yes		0.0427063	No
ENSG00000142156	COL6A1 subnetwork	4.09866e-06	Yes		0.0451337	No
ENSG00000137801	THBS1 subnetwork	4.2917e-06	Yes		0.479104	No
ENSG00000131791	PRKAB2 subnetwork	4.57542e-06	Yes		0.00240795	Yes
ENSG00000170421	KRT8 subnetwork	5.30276e-06	Yes		0.0456148	No
ENSG00000115414	FN1 subnetwork	5.57818e-06	Yes		0.0617836	No
ENSG00000174292	TNK1 subnetwork	6.87986e-06	Yes		4.20641e-07	Yes
ENSG00000132561	MATN2 subnetwork	7.45772e-06	Yes		0.0546085	No
ENSG00000141646	SMAD4 subnetwork	8.07704e-06	Yes		0.000363352	Yes
ENSG00000011465	DCN subnetwork	8.25675e-06	Yes		0.676013	No
ENSG00000163453	IGFBP7 subnetwork	8.55096e-06	Yes		0.0574943	No
ENSG00000135503	ACVR1B subnetwork	9.57467e-06	Yes		0.000520867	Yes
ENSG00000120708	TGFBI subnetwork	9.83066e-06	Yes		0.206373	No
ENSG00000166866	MYO1A subnetwork	1.29859e-05	Yes		0.000443558	Yes
ENSG00000130702	LAMA5 subnetwork	1.62894e-05	Yes		0.148712	No
ENSG00000113140	SPARC subnetwork	1.7626e-05	Yes		0.0304519	No
ENSG00000125810	CD93 subnetwork	1.76936e-05	Yes		0.351333	No
ENSG00000105329	TGFB1 subnetwork	1.81443e-05	Yes		0.253783	No
ENSG00000187498	COL4A1 subnetwork	2.32566e-05	Yes		0.0985784	No
ENSG00000128641	MYO1B subnetwork	2.47576e-05	Yes		0.000876746	Yes
ENSG00000069702	TGFBR3 subnetwork	2.63962e-05	Yes		0.00356705	Yes
ENSG00000100644	HIF1A subnetwork	2.68896e-05	Yes		0.0407221	No
ENSG00000171681	ATF7IP subnetwork	2.87846e-05	Yes		1.03064e-10	Yes
ENSG00000087303	NID2 subnetwork	2.90162e-05	Yes		0.00371799	Yes
ENSG00000049540	ELN subnetwork	2.95101e-05	Yes		0.875984	No
ENSG00000089159	PXN subnetwork	3.13427e-05	Yes		0.00010087	Yes
ENSG00000114251	WNT5A subnetwork	3.34983e-05	Yes		0.183282	No
ENSG00000165197	FIGF subnetwork	3.62084e-05	Yes		0.000283484	Yes
ENSG00000125686	MED1 subnetwork	3.73539e-05	Yes		0.00499088	No
ENSG00000136999	NOV subnetwork	3.83197e-05	Yes		0.10364	No
ENSG00000140285	FGF7 subnetwork	3.88996e-05	Yes		0.00267659	Yes
ENSG00000184916	JAG2 subnetwork	4.03753e-05	Yes		0.0493694	No
ENSG00000118971	CCND2 subnetwork	4.09051e-05	Yes		0.00597298	No
ENSG00000111676	ATN1 subnetwork	4.77942e-05	Yes		0.629298	No
ENSG00000092969	TGFB2 subnetwork	4.91914e-05	Yes		0.692601	No
ENSG00000161638	ITGA5 subnetwork	4.92026e-05	Yes		0.0274418	No
ENSG00000135424	ITGA7 subnetwork	4.99584e-05	Yes		0.00426585	Yes
ENSG00000087095	NLK subnetwork	5.13897e-05	Yes		4.77843e-05	Yes
ENSG00000163513	TGFBR2 subnetwork	5.31291e-05	Yes		0.000877705	Yes
ENSG00000173372	C1QA subnetwork	5.45373e-05	Yes		0.200294	No
ENSG00000135862	LAMC1 subnetwork	5.79206e-05	Yes		0.00302698	Yes
ENSG00000148848	ADAM12 subnetwork	6.49011e-05	Yes		2.11156e-06	Yes
ENSG00000151090	THRB subnetwork	6.53048e-05	Yes		9.63783e-05	Yes
ENSG00000136603	SKIL subnetwork	7.73537e-05	Yes		1.65952e-11	Yes
ENSG00000165410	CFL2 subnetwork	7.90482e-05	Yes		0.000114226	Yes
ENSG00000167657	DAPK3 subnetwork	8.64582e-05	Yes		0.00439328	Yes
ENSG00000182492	BGN subnetwork	9.15956e-05	Yes		0.429937	No
ENSG00000170365	SMAD1 subnetwork	9.44679e-05	Yes		8.03385e-06	Yes
ENSG00000197045	GMFB subnetwork	0.000105573	Yes		2.17544e-05	Yes
ENSG00000005339	CREBBP subnetwork	0.000107939	Yes		3.35458e-09	Yes
ENSG00000168487	BMP1 subnetwork	0.000112313	Yes		0.861336	No
ENSG00000140443	IGF1R subnetwork	0.000112629	Yes		2.0176e-05	Yes
ENSG00000166949	SMAD3 subnetwork	0.000113545	Yes		8.44711e-07	Yes
ENSG00000134202	GSTM3 subnetwork	0.000113973	Yes		1.1729e-05	Yes
ENSG00000115461	IGFBP5 subnetwork	0.00011995	Yes		0.0262005	No
ENSG00000070759	TESK2 subnetwork	0.000125596	Yes		0.00171996	Yes
ENSG00000114270	COL7A1 subnetwork	0.000133184	Yes		0.766431	No
ENSG00000107562	CXCL12 subnetwork	0.000133548	Yes		0.892948	No
ENSG00000139219	COL2A1 subnetwork	0.000134065	Yes		0.192821	No
ENSG00000122641	INHBA subnetwork	0.000136219	Yes		0.166753	No
ENSG00000146674	IGFBP3 subnetwork	0.000148035	Yes		0.673384	No
ENSG00000091136	LAMB1 subnetwork	0.000148985	Yes		0.000553622	Yes
ENSG00000204231	RXRB subnetwork	0.000156508	Yes		0.0005617	Yes
ENSG00000206218	ENSG00000206218 subnetwork	0.000156508	Yes		0.0005617	Yes
ENSG00000206289	RXRB subnetwork	0.000156508	Yes		0.0005617	Yes
ENSG00000154342	WNT3A subnetwork	0.000159413	Yes		0.0478803	No
ENSG00000006747	SCIN subnetwork	0.000162899	Yes		0.000173631	Yes
ENSG00000122692	SMU1 subnetwork	0.000164833	Yes		0.000161042	Yes
ENSG00000196517	SLC6A9 subnetwork	0.000171346	Yes		0.337942	No
ENSG00000112658	SRF subnetwork	0.000174197	Yes		4.74634e-08	Yes
ENSG00000188064	WNT7B subnetwork	0.00018046	Yes		0.33489	No
ENSG00000122194	PLG subnetwork	0.000190074	Yes		0.664305	No
ENSG00000100345	MYH9 subnetwork	0.000195044	Yes		0.000335051	Yes
ENSG00000132109	TRIM21 subnetwork	0.000196629	Yes		0.000244136	Yes
ENSG00000169439	SDC2 subnetwork	0.000196935	Yes		0.836868	No
ENSG00000108379	WNT3 subnetwork	0.000211343	Yes		0.328777	No
ENSG00000115641	FHL2 subnetwork	0.000211595	Yes		4.83e-06	Yes
ENSG00000039560	RAI14 subnetwork	0.000219736	Yes		0.00212757	Yes
ENSG00000198467	TPM2 subnetwork	0.00022038	Yes		0.000902728	Yes
ENSG00000197063	MAFG subnetwork	0.000227991	Yes		0.872071	No
ENSG00000042429	MED17 subnetwork	0.000240693	Yes		0.181296	No
ENSG00000108821	COL1A1 subnetwork	0.000243575	Yes		0.149754	No
ENSG00000134313	KIDINS220 subnetwork	0.000252176	Yes		0.00111345	Yes
ENSG00000167244	IGF2 subnetwork	0.000267737	Yes		0.0696068	No
ENSG00000110880	CORO1C subnetwork	0.000275949	Yes		0.000103067	Yes
ENSG00000049323	LTBP1 subnetwork	0.000282636	Yes		0.0273089	No
ENSG00000115718	PROC subnetwork	0.000291317	Yes		0.0334556	No
ENSG00000197561	ELANE subnetwork	0.000301933	Yes		0.906644	No
ENSG00000114166	KAT2B subnetwork	0.000302187	Yes		0.00707743	No
ENSG00000186340	THBS2 subnetwork	0.000312088	Yes		0.202288	No
ENSG00000061492	WNT8A subnetwork	0.000321605	Yes		0.376093	No
ENSG00000075290	WNT8B subnetwork	0.000321605	Yes		0.376093	No
ENSG00000085741	WNT11 subnetwork	0.000321605	Yes		0.376093	No
ENSG00000105989	WNT2 subnetwork	0.000321605	Yes		0.376093	No
ENSG00000135925	WNT10A subnetwork	0.000321605	Yes		0.376093	No
ENSG00000143816	WNT9A subnetwork	0.000321605	Yes		0.376093	No
ENSG00000158955	WNT9B subnetwork	0.000321605	Yes		0.376093	No
ENSG00000169884	WNT10B subnetwork	0.000321605	Yes		0.376093	No
ENSG00000172725	CORO1B subnetwork	0.00033507	Yes		8.55295e-06	Yes
ENSG00000143375	CGN subnetwork	0.000350549	Yes		0.000149006	Yes
ENSG00000149257	SERPINH1 subnetwork	0.000353542	Yes		1.19738e-05	Yes
ENSG00000148965	SAA4 subnetwork	0.000358483	Yes		0.945987	No
ENSG00000115596	WNT6 subnetwork	0.000360162	Yes		0.386507	No
ENSG00000037280	FLT4 subnetwork	0.000361493	Yes		0.00948354	No
ENSG00000126461	SCAF1 subnetwork	0.000372216	Yes		0.90833	No
ENSG00000118785	SPP1 subnetwork	0.000374506	Yes		0.0013634	Yes
ENSG00000162512	SDC3 subnetwork	0.000378239	Yes		0.512139	No
ENSG00000151694	ADAM17 subnetwork	0.0003797	Yes		0.576	No
ENSG00000099250	NRP1 subnetwork	0.000381673	Yes		0.00812745	No
ENSG00000017427	IGF1 subnetwork	0.000382851	Yes		0.0549661	No
ENSG00000111186	WNT5B subnetwork	0.000385411	Yes		0.398074	No
ENSG00000154764	WNT7A subnetwork	0.00038756	Yes		0.388884	No
ENSG00000197757	HOXC6 subnetwork	0.00039866	Yes		0.186528	No
ENSG00000154928	EPHB1 subnetwork	0.000401881	Yes		0.0606435	No
ENSG00000070018	LRP6 subnetwork	0.000403998	Yes		0.000302949	Yes
ENSG00000164171	ITGA2 subnetwork	0.000417402	Yes		0.0583262	No
ENSG00000215699	ENSG00000215699 subnetwork	0.000422383	Yes		0.00314919	Yes
ENSG00000151914	DST subnetwork	0.000429167	Yes		0.00977542	No
ENSG00000134215	VAV3 subnetwork	0.000440086	Yes		8.12255e-06	Yes
ENSG00000134245	WNT2B subnetwork	0.000440809	Yes		0.420141	No
ENSG00000173511	VEGFB subnetwork	0.000448728	Yes		0.00126018	Yes
ENSG00000120693	SMAD9 subnetwork	0.000468506	Yes		6.48779e-07	Yes
ENSG00000136352	NKX2-1 subnetwork	0.00047936	Yes		2.33721e-07	Yes
ENSG00000129965	INS-IGF2 subnetwork	0.000490629	Yes		0.0339768	No
ENSG00000198719	DLL1 subnetwork	0.000501216	Yes		0.248927	No
ENSG00000105287	PRKD2 subnetwork	0.000519016	Yes		0.00410664	Yes
ENSG00000212908	ENSG00000212908 subnetwork	0.000521961	Yes		0.0098131	No
ENSG00000213416	KRTAP4-12 subnetwork	0.000521961	Yes		0.0098131	No
ENSG00000142599	RERE subnetwork	0.000531748	Yes		0.260955	No
ENSG00000130254	SAFB2 subnetwork	0.0005345	Yes		3.13402e-05	Yes
ENSG00000127564	PKMYT1 subnetwork	0.000535329	Yes		0.242835	No
ENSG00000103653	CSK subnetwork	0.000536411	Yes		2.16172e-05	Yes
ENSG00000071909	MYO3B subnetwork	0.000546023	Yes		0.00012065	Yes
ENSG00000155366	RHOC subnetwork	0.000584994	Yes		0.0107479	No
ENSG00000102755	FLT1 subnetwork	0.000598131	Yes		0.00200307	Yes
ENSG00000112773	FAM46A subnetwork	0.000599398	Yes		0.0263996	No
ENSG00000054118	THRAP3 subnetwork	0.000605342	Yes		0.00405398	Yes
ENSG00000115170	ACVR1 subnetwork	0.000623293	Yes		0.132814	No
ENSG00000087245	MMP2 subnetwork	0.000623337	Yes		0.412674	No
ENSG00000196782	MAML3 subnetwork	0.000634302	Yes		0.0596825	No
ENSG00000105357	MYH14 subnetwork	0.000637533	Yes		0.00138646	Yes
ENSG00000119630	PGF subnetwork	0.000643105	Yes		0.0057415	No
ENSG00000034971	MYOC subnetwork	0.000647271	Yes		0.684629	No
ENSG00000165702	GFI1B subnetwork	0.000657612	Yes		0.516064	No
ENSG00000175387	SMAD2 subnetwork	0.000662605	Yes		5.03373e-09	Yes
ENSG00000162704	ARPC5 subnetwork	0.000707028	Yes		0.000126306	Yes
ENSG00000005884	ITGA3 subnetwork	0.000708759	Yes		0.000513522	Yes
ENSG00000123612	ACVR1C subnetwork	0.00073314	Yes		0.000364735	Yes
ENSG00000164867	NOS3 subnetwork	0.000753421	Yes		0.0112104	No
ENSG00000166908	PIP4K2C subnetwork	0.000764201	Yes		7.93222e-06	Yes
ENSG00000041982	TNC subnetwork	0.000779435	Yes		0.00205507	Yes
ENSG00000159228	CBR1 subnetwork	0.000787572	Yes		0.00131701	Yes
ENSG00000176165	FOXG1 subnetwork	0.000821577	Yes		0.00538271	No
ENSG00000114739	ACVR2B subnetwork	0.000831979	Yes		0.00439573	Yes
ENSG00000181929	PRKAG1 subnetwork	0.00083867	Yes		0.0460893	No
ENSG00000008838	MED24 subnetwork	0.000847925	Yes		0.0241699	No
ENSG00000127334	DYRK2 subnetwork	0.000857541	Yes		0.0104605	No
ENSG00000168421	RHOH subnetwork	0.000861876	Yes		0.329632	No
ENSG00000178209	PLEC subnetwork	0.000884888	Yes		0.00785797	No
ENSG00000213555	ENSG00000213555 subnetwork	0.000889621	Yes		0.00115455	Yes
ENSG00000165458	INPPL1 subnetwork	0.000922243	Yes		0.000366124	Yes
ENSG00000091409	ITGA6 subnetwork	0.000922494	Yes		8.80622e-05	Yes
ENSG00000117118	SDHB subnetwork	0.000927159	Yes		0.0185076	No
ENSG00000136250	AOAH subnetwork	0.000927933	Yes		0.981063	No
ENSG00000135218	CD36 subnetwork	0.000940874	Yes		0.00153242	Yes
ENSG00000108679	LGALS3BP subnetwork	0.000942278	Yes		0.00154681	Yes
ENSG00000092841	MYL6 subnetwork	0.000964015	Yes		0.00591789	No
ENSG00000100014	SPECC1L subnetwork	0.00100217	Yes		0.000315771	Yes
ENSG00000214655	KIAA0913 subnetwork	0.00102337	Yes		0.09481	No
ENSG00000115232	ITGA4 subnetwork	0.0010384	Yes		0.000704615	Yes
ENSG00000106991	ENG subnetwork	0.00104474	Yes		0.0214085	No
ENSG00000023734	STRAP subnetwork	0.00105018	Yes		0.0209342	No
ENSG00000182199	SHMT2 subnetwork	0.00106083	Yes		0.00626865	No
ENSG00000118762	PKD2 subnetwork	0.00108063	Yes		0.000557109	Yes
ENSG00000005961	ITGA2B subnetwork	0.00108428	Yes		0.179338	No
ENSG00000100311	PDGFB subnetwork	0.00111389	Yes		0.0615374	No
ENSG00000185630	PBX1 subnetwork	0.00113406	Yes		0.00413082	Yes
ENSG00000087008	ACOX3 subnetwork	0.00114803	Yes		0.00495586	No
ENSG00000137831	UACA subnetwork	0.00114969	Yes		4.10895e-05	Yes
ENSG00000182010	RTKN2 subnetwork	0.00115126	Yes		0.992789	No
ENSG00000078401	EDN1 subnetwork	0.00115645	Yes		0.172416	No
ENSG00000091831	ESR1 subnetwork	0.0011743	Yes		9.81575e-08	Yes
ENSG00000025434	NR1H3 subnetwork	0.00119488	Yes		0.00119266	Yes
ENSG00000170759	KIF5B subnetwork	0.00120941	Yes		3.74272e-05	Yes
ENSG00000128322	IGLL1 subnetwork	0.00124455	Yes		0.95411	No
ENSG00000185532	PRKG1 subnetwork	0.00129184	Yes		0.0312942	No
ENSG00000013441	CLK1 subnetwork	0.00129326	Yes		0.0131886	No
ENSG00000100393	EP300 subnetwork	0.0013214	Yes		1.86165e-09	Yes
ENSG00000171345	KRT19 subnetwork	0.00134048	Yes		0.282986	No
ENSG00000035403	VCL subnetwork	0.00136799	Yes		0.0216922	No
ENSG00000157764	BRAF subnetwork	0.00141682	Yes		9.25689e-06	Yes
ENSG00000163349	HIPK1 subnetwork	0.00141989	Yes		0.000435673	Yes
ENSG00000084207	GSTP1 subnetwork	0.00142229	Yes		2.31855e-05	Yes
ENSG00000143622	RIT1 subnetwork	0.00152109	Yes		0.01726	No
ENSG00000156136	DCK subnetwork	0.0015534	Yes		0.0111876	No
ENSG00000196586	MYO6 subnetwork	0.00156939	Yes		0.000590546	Yes
ENSG00000173153	ESRRA subnetwork	0.00158991	Yes		3.70325e-05	Yes
ENSG00000182809	CRIP2 subnetwork	0.00161742	Yes		0.00135326	Yes
ENSG00000182533	CAV3 subnetwork	0.00161776	Yes		0.0116191	No
ENSG00000118985	ELL2 subnetwork	0.00162622	Yes		0.174452	No
ENSG00000157227	MMP14 subnetwork	0.00169282	Yes		0.748716	No
ENSG00000150630	VEGFC subnetwork	0.0017186	Yes		0.0180022	No
ENSG00000162552	WNT4 subnetwork	0.00176125	Yes		0.00142316	Yes
ENSG00000123159	GIPC1 subnetwork	0.00178685	Yes		0.00315129	Yes
ENSG00000106028	SSBP1 subnetwork	0.00180285	Yes		0.000212715	Yes
ENSG00000122861	PLAU subnetwork	0.00181288	Yes		0.124997	No
ENSG00000204348	DOM3Z subnetwork	0.00183796	Yes		0.326431	No
ENSG00000206266	ENSG00000206266 subnetwork	0.00183796	Yes		0.326431	No
ENSG00000206346	DOM3Z subnetwork	0.00183796	Yes		0.326431	No
ENSG00000171862	PTEN subnetwork	0.00184398	Yes		0.0466405	No
ENSG00000169710	FASN subnetwork	0.00188568	Yes		0.0508966	No
ENSG00000188843	ENSG00000188843 subnetwork	0.00196164	Yes		0.000103877	Yes
ENSG00000072518	MARK2 subnetwork	0.00197947	Yes		0.00294219	Yes
ENSG00000163347	CLDN1 subnetwork	0.00198884	Yes		0.190491	No
ENSG00000125740	FOSB subnetwork	0.00200159	Yes		0.467409	No
ENSG00000160447	PKN3 subnetwork	0.00200363	Yes		0.00111896	Yes
ENSG00000148737	TCF7L2 subnetwork	0.00203399	Yes		0.189148	No
ENSG00000196923	PDLIM7 subnetwork	0.00206976	Yes		2.69767e-05	Yes
ENSG00000182185	RAD51B subnetwork	0.00209358	Yes		0.687803	No
ENSG00000197461	PDGFA subnetwork	0.00212348	Yes		0.0156968	No
ENSG00000016082	ISL1 subnetwork	0.00212645	Yes		0.0688733	No
ENSG00000197785	ATAD3A subnetwork	0.00212754	Yes		0.00684894	No
ENSG00000168542	COL3A1 subnetwork	0.00213797	Yes		0.201686	No
ENSG00000139567	ACVRL1 subnetwork	0.00217747	Yes		0.194649	No
ENSG00000175445	LPL subnetwork	0.00219909	Yes		0.0113514	No
ENSG00000120156	TEK subnetwork	0.00222589	Yes		0.0895426	No
ENSG00000108819	ENSG00000108819 subnetwork	0.0022312	Yes		0.00343527	Yes
ENSG00000113196	HAND1 subnetwork	0.00226742	Yes		0.000113375	Yes
ENSG00000092820	EZR subnetwork	0.00228308	Yes		0.000640147	Yes
ENSG00000136068	FLNB subnetwork	0.00231317	Yes		0.000609873	Yes
ENSG00000008710	PKD1 subnetwork	0.0023446	Yes		0.000437227	Yes
ENSG00000133026	MYH10 subnetwork	0.00236356	Yes		0.00488554	No
ENSG00000019991	HGF subnetwork	0.002441	Yes		0.0494232	No
ENSG00000111674	ENO2 subnetwork	0.0024434	Yes		0.212745	No
ENSG00000115884	SDC1 subnetwork	0.00246071	Yes		0.952658	No
ENSG00000107779	BMPR1A subnetwork	0.00249959	Yes		0.00457264	Yes
ENSG00000131788	PIAS3 subnetwork	0.0025289	Yes		2.01296e-05	Yes
ENSG00000175354	PTPN2 subnetwork	0.00258518	Yes		0.00117899	Yes
ENSG00000108953	YWHAE subnetwork	0.00264481	Yes		6.93924e-05	Yes
ENSG00000126351	THRA subnetwork	0.00267167	Yes		0.000355365	Yes
ENSG00000109814	UGDH subnetwork	0.00267438	Yes		0.00051157	Yes
ENSG00000092847	EIF2C1 subnetwork	0.00268451	Yes		0.000179767	Yes
ENSG00000093167	LRRFIP2 subnetwork	0.00289209	Yes		0.000591256	Yes
ENSG00000078399	HOXA9 subnetwork	0.00289465	Yes		0.00507079	No
ENSG00000136574	GATA4 subnetwork	0.00289875	Yes		0.000408993	Yes
ENSG00000134376	CRB1 subnetwork	0.00290827	Yes		0.466455	No
ENSG00000161021	MAML1 subnetwork	0.00292919	Yes		0.0068765	No
ENSG00000167085	PHB subnetwork	0.00301267	Yes		0.016576	No
ENSG00000157766	ACAN subnetwork	0.00302757	Yes		0.997085	No
ENSG00000118495	PLAGL1 subnetwork	0.00304666	Yes		0.0415591	No
ENSG00000132356	PRKAA1 subnetwork	0.00305298	Yes		0.0456623	No
ENSG00000107242	PIP5K1B subnetwork	0.00309773	Yes		0.000221916	Yes
ENSG00000151422	FER subnetwork	0.00313668	Yes		0.0013504	Yes
ENSG00000121057	AKAP1 subnetwork	0.00318359	Yes		0.0416236	No
ENSG00000160584	SIK3 subnetwork	0.00324643	Yes		0.00588876	No
ENSG00000112249	ASCC3 subnetwork	0.0033317	Yes		0.000180152	Yes
ENSG00000144668	ITGA9 subnetwork	0.0033331	Yes		8.5372e-05	Yes
ENSG00000134184	GSTM1 subnetwork	0.00334026	Yes		2.59508e-05	Yes
ENSG00000078579	FGF20 subnetwork	0.00337667	Yes		0.00131496	Yes
ENSG00000162409	PRKAA2 subnetwork	0.00340842	Yes		0.0340174	No
ENSG00000135547	HEY2 subnetwork	0.00344291	Yes		0.0484878	No
ENSG00000166228	PCBD1 subnetwork	0.0034491	Yes		0.293473	No
ENSG00000169083	AR subnetwork	0.00345785	Yes		0.000342035	Yes
ENSG00000075388	FGF4 subnetwork	0.00346672	Yes		0.0340035	No
ENSG00000166913	YWHAB subnetwork	0.00347756	Yes		5.78347e-06	Yes
ENSG00000173210	ABLIM3 subnetwork	0.0034815	Yes		0.000496817	Yes
ENSG00000141279	NPEPPS subnetwork	0.00349513	Yes		0.814465	No
ENSG00000181827	RFX7 subnetwork	0.00353833	Yes		0.992155	No
ENSG00000102010	BMX subnetwork	0.0036322	Yes		0.0228253	No
ENSG00000110422	HIPK3 subnetwork	0.00365069	Yes		0.00265922	Yes
ENSG00000196415	PRTN3 subnetwork	0.00366579	Yes		0.424406	No
ENSG00000118690	ARMC2 subnetwork	0.00367504	Yes		0.987078	No
ENSG00000168488	ATXN2L subnetwork	0.00379443	Yes		0.000145521	Yes
ENSG00000084676	NCOA1 subnetwork	0.00379717	Yes		9.00506e-06	Yes
ENSG00000131746	TNS4 subnetwork	0.00384933	Yes		0.000176383	Yes
ENSG00000105204	DYRK1B subnetwork	0.00385916	Yes		0.0858161	No
ENSG00000060140	STYK1 subnetwork	0.00391433	Yes		0.0187672	No
ENSG00000125508	SRMS subnetwork	0.00391433	Yes		0.0187672	No
ENSG00000105695	MAG subnetwork	0.00393422	Yes		0.536133	No
ENSG00000164107	HAND2 subnetwork	0.00394551	Yes		0.000947955	Yes
ENSG00000178573	MAF subnetwork	0.00401991	Yes		0.213967	No
ENSG00000185420	SMYD3 subnetwork	0.00405872	Yes		0.0305278	No
ENSG00000162614	NEXN subnetwork	0.00405931	Yes		0.000448233	Yes
ENSG00000124575	HIST1H1D subnetwork	0.00409795	Yes		0.026403	No
ENSG00000100815	TRIP11 subnetwork	0.00412153	Yes		0.00233479	Yes
ENSG00000213639	PPP1CB subnetwork	0.00412451	Yes		0.00741314	No
ENSG00000147443	DOK2 subnetwork	0.00413761	Yes		0.00229298	Yes
ENSG00000169641	LUZP1 subnetwork	0.00422916	Yes		0.000927827	Yes
ENSG00000134363	FST subnetwork	0.00423252	Yes		0.912291	No
ENSG00000091436	ENSG00000091436 subnetwork	0.00427412	Yes		0.00461403	Yes
ENSG00000197879	MYO1C subnetwork	0.00430806	No		0.00390841	Yes
ENSG00000143995	MEIS1 subnetwork	0.00431262	No		5.65269e-05	Yes
ENSG00000101213	PTK6 subnetwork	0.00433669	No		0.00440127	Yes
ENSG00000160293	VAV2 subnetwork	0.00438201	No		0.000124407	Yes
ENSG00000101665	SMAD7 subnetwork	0.0044167	No		0.000107211	Yes
ENSG00000113658	SMAD5 subnetwork	0.00452873	No		1.14542e-05	Yes
ENSG00000105699	LSR subnetwork	0.00458667	No		0.00174075	Yes
ENSG00000214528	ENSG00000214528 subnetwork	0.00472408	No		3.62134e-05	Yes
ENSG00000164111	ANXA5 subnetwork	0.00486022	No		0.00482002	Yes
ENSG00000128487	SPECC1 subnetwork	0.00489408	No		0.000450994	Yes
ENSG00000144061	NPHP1 subnetwork	0.00490034	No		0.00398082	Yes
ENSG00000084754	HADHA subnetwork	0.00490263	No		0.0021526	Yes
ENSG00000142675	CNKSR1 subnetwork	0.00518822	No		9.12388e-05	Yes
ENSG00000163909	HEYL subnetwork	0.00526073	No		0.00102793	Yes
ENSG00000031544	ENSG00000031544 subnetwork	0.00530497	No		0.00398721	Yes
ENSG00000061273	HDAC7 subnetwork	0.00539494	No		0.000688122	Yes
ENSG00000197616	MYH6 subnetwork	0.00579858	No		0.00338381	Yes
ENSG00000129250	KIF1C subnetwork	0.00580739	No		0.00349396	Yes
ENSG00000136026	CKAP4 subnetwork	0.00583387	No		0.00103805	Yes
ENSG00000056345	ENSG00000056345 subnetwork	0.00597129	No		0.0030385	Yes
ENSG00000106992	AK1 subnetwork	0.00613511	No		0.000359689	Yes
ENSG00000080824	HSP90AA1 subnetwork	0.00621101	No		0.000613503	Yes
ENSG00000050748	MAPK9 subnetwork	0.00623403	No		4.83146e-06	Yes
ENSG00000120709	FAM53C subnetwork	0.0062763	No		0.00133776	Yes
ENSG00000068615	REEP1 subnetwork	0.00643589	No		0.00106585	Yes
ENSG00000138592	USP8 subnetwork	0.00653921	No		1.8259e-05	Yes
ENSG00000120738	EGR1 subnetwork	0.00654297	No		0.000413529	Yes
ENSG00000205250	E2F4 subnetwork	0.00668627	No		2.65986e-05	Yes
ENSG00000075413	MARK3 subnetwork	0.00695817	No		0.000194338	Yes
ENSG00000142208	AKT1 subnetwork	0.00722569	No		1.4318e-06	Yes
ENSG00000140464	PML subnetwork	0.00725751	No		0.00162547	Yes
ENSG00000186852	ENSG00000186852 subnetwork	0.00733206	No		0.00241844	Yes
ENSG00000049618	ARID1B subnetwork	0.00755094	No		9.59361e-07	Yes
ENSG00000105974	CAV1 subnetwork	0.00792941	No		9.64368e-07	Yes
ENSG00000106546	AHR subnetwork	0.00859879	No		1.42789e-05	Yes
ENSG00000169398	PTK2 subnetwork	0.00866427	No		1.6192e-08	Yes
ENSG00000113758	DBN1 subnetwork	0.00867958	No		0.00132241	Yes
ENSG00000157557	ETS2 subnetwork	0.00875786	No		0.000266246	Yes
ENSG00000101331	C20orf160 subnetwork	0.00881606	No		0.000760233	Yes
ENSG00000090061	CCNK subnetwork	0.00909774	No		0.000222222	Yes
ENSG00000119689	DLST subnetwork	0.00918744	No		0.000222848	Yes
ENSG00000105662	CRTC1 subnetwork	0.00925381	No		0.00208406	Yes
ENSG00000137171	KLC4 subnetwork	0.0092741	No		0.0011138	Yes
ENSG00000065882	TBC1D1 subnetwork	0.00964723	No		0.00458065	Yes
ENSG00000159251	ACTC1 subnetwork	0.00981728	No		0.000111701	Yes
ENSG00000185551	NR2F2 subnetwork	0.0100535	No		2.12389e-05	Yes
ENSG00000125503	PPP1R12C subnetwork	0.0101169	No		0.00116923	Yes
ENSG00000148400	NOTCH1 subnetwork	0.0102166	No		2.71491e-05	Yes
ENSG00000196700	ZNF512B subnetwork	0.0105261	No		0.000263513	Yes
ENSG00000135144	DTX1 subnetwork	0.0109209	No		0.000143332	Yes
ENSG00000107882	SUFU subnetwork	0.0111513	No		0.00204658	Yes
ENSG00000171992	SYNPO subnetwork	0.0113605	No		0.000226876	Yes
ENSG00000125731	SH2D3A subnetwork	0.0113628	No		0.000260056	Yes
ENSG00000029363	BCLAF1 subnetwork	0.011408	No		0.0022039	Yes
ENSG00000138798	EGF subnetwork	0.0115604	No		0.00113808	Yes
ENSG00000136153	LMO7 subnetwork	0.0117479	No		0.00334338	Yes
ENSG00000133030	MPRIP subnetwork	0.0118316	No		3.59078e-05	Yes
ENSG00000143322	ABL2 subnetwork	0.0119154	No		0.00193334	Yes
ENSG00000157110	RBPMS subnetwork	0.0119789	No		0.00114784	Yes
ENSG00000198176	TFDP1 subnetwork	0.012219	No		1.15991e-05	Yes
ENSG00000183072	NKX2-5 subnetwork	0.0122534	No		9.64085e-05	Yes
ENSG00000197122	SRC subnetwork	0.0122804	No		1.35218e-10	Yes
ENSG00000099139	PCSK5 subnetwork	0.0123368	No		6.65734e-05	Yes
ENSG00000165699	TSC1 subnetwork	0.0124504	No		0.000635374	Yes
ENSG00000163466	ARPC2 subnetwork	0.0124568	No		0.000157981	Yes
ENSG00000106799	TGFBR1 subnetwork	0.0126461	No		0.0016296	Yes
ENSG00000182319	SGK223 subnetwork	0.0129794	No		0.00165365	Yes
ENSG00000007264	MATK subnetwork	0.0132116	No		0.00114741	Yes
ENSG00000181856	SLC2A4 subnetwork	0.0132518	No		0.000315557	Yes
ENSG00000075618	FSCN1 subnetwork	0.0145316	No		0.00113709	Yes
ENSG00000186831	ENSG00000186831 subnetwork	0.0149474	No		0.00467045	Yes
ENSG00000174996	KLC2 subnetwork	0.0149699	No		0.00199091	Yes
ENSG00000127688	GAN subnetwork	0.0155656	No		0.000536142	Yes
ENSG00000001167	NFYA subnetwork	0.0165318	No		0.00063181	Yes
ENSG00000171241	SHCBP1 subnetwork	0.0181208	No		2.65372e-05	Yes
ENSG00000204361	FAM55B subnetwork	0.018264	No		0.000410512	Yes
ENSG00000116604	MEF2D subnetwork	0.0183514	No		0.000290515	Yes
ENSG00000159216	RUNX1 subnetwork	0.018489	No		0.000790778	Yes
ENSG00000146648	EGFR subnetwork	0.018502	No		7.71747e-05	Yes
ENSG00000204673	AKT1S1 subnetwork	0.0191341	No		0.00363669	Yes
ENSG00000129152	MYOD1 subnetwork	0.019412	No		4.16054e-05	Yes
ENSG00000133794	ARNTL subnetwork	0.0200898	No		0.0027724	Yes
ENSG00000143379	SETDB1 subnetwork	0.0202101	No		0.00407536	Yes
ENSG00000175793	SFN subnetwork	0.0203733	No		3.26781e-05	Yes
ENSG00000136286	MYO1G subnetwork	0.0205046	No		0.00191166	Yes
ENSG00000080839	RBL1 subnetwork	0.0208319	No		0.000822463	Yes
ENSG00000143632	ACTA1 subnetwork	0.0211357	No		3.82041e-05	Yes
ENSG00000146950	SHROOM2 subnetwork	0.0212352	No		0.000353895	Yes
ENSG00000123836	PFKFB2 subnetwork	0.0212399	No		0.00025298	Yes
ENSG00000150907	FOXO1 subnetwork	0.0218178	No		1.73946e-06	Yes
ENSG00000100294	MCAT subnetwork	0.0218614	No		0.00011693	Yes
ENSG00000091073	ENSG00000091073 subnetwork	0.021978	No		0.00294751	Yes
ENSG00000110042	DTX4 subnetwork	0.0220849	No		3.6871e-05	Yes
ENSG00000168476	REEP4 subnetwork	0.0221463	No		0.000187335	Yes
ENSG00000137076	TLN1 subnetwork	0.0222378	No		0.00156853	Yes
ENSG00000140396	NCOA2 subnetwork	0.0223246	No		1.00765e-05	Yes
ENSG00000184363	PKP3 subnetwork	0.0226413	No		0.000257013	Yes
ENSG00000104960	PTOV1 subnetwork	0.0233391	No		8.74416e-05	Yes
ENSG00000100364	KIAA0930 subnetwork	0.0233504	No		0.000913874	Yes
ENSG00000160691	SHC1 subnetwork	0.0235162	No		3.80836e-06	Yes
ENSG00000189319	FAM53B subnetwork	0.0242439	No		0.000673454	Yes
ENSG00000163362	C1orf106 subnetwork	0.025172	No		0.000450994	Yes
ENSG00000143393	PI4KB subnetwork	0.0259982	No		0.000292168	Yes
ENSG00000140575	IQGAP1 subnetwork	0.0266505	No		0.00209943	Yes
ENSG00000186350	RXRA subnetwork	0.0270059	No		7.6538e-05	Yes
ENSG00000151623	NR3C2 subnetwork	0.0281258	No		0.000176217	Yes
ENSG00000115904	SOS1 subnetwork	0.0283002	No		0.000217928	Yes
ENSG00000126001	CEP250 subnetwork	0.028968	No		0.00357634	Yes
ENSG00000164327	RICTOR subnetwork	0.0297083	No		2.93953e-05	Yes
ENSG00000184863	RBM33 subnetwork	0.0298926	No		0.000119991	Yes
ENSG00000163806	SPDYA subnetwork	0.0299189	No		0.00156991	Yes
ENSG00000122180	MYOG subnetwork	0.0299765	No		1.81663e-05	Yes
ENSG00000113721	PDGFRB subnetwork	0.0302891	No		0.00376165	Yes
ENSG00000121879	PIK3CA subnetwork	0.0304994	No		2.94795e-06	Yes
ENSG00000186951	PPARA subnetwork	0.031099	No		0.00110174	Yes
ENSG00000004975	DVL2 subnetwork	0.0313125	No		0.000225871	Yes
ENSG00000141655	TNFRSF11A subnetwork	0.0318118	No		1.75043e-05	Yes
ENSG00000189403	HMGB1 subnetwork	0.032339	No		0.00224161	Yes
ENSG00000116478	HDAC1 subnetwork	0.0327044	No		1.9087e-05	Yes
ENSG00000111229	ARPC3 subnetwork	0.0327929	No		0.00163841	Yes
ENSG00000182541	LIMK2 subnetwork	0.0329411	No		0.00162824	Yes
ENSG00000168884	TNIP2 subnetwork	0.0332365	No		0.000587523	Yes
ENSG00000164924	YWHAZ subnetwork	0.0332883	No		5.61759e-05	Yes
ENSG00000124151	NCOA3 subnetwork	0.0333299	No		1.93888e-05	Yes
ENSG00000101076	HNF4A subnetwork	0.033614	No		0.00217478	Yes
ENSG00000198933	TBKBP1 subnetwork	0.0347615	No		0.00399442	Yes
ENSG00000119812	FAM98A subnetwork	0.0358165	No		7.53284e-05	Yes
ENSG00000076604	TRAF4 subnetwork	0.0360596	No		0.00391425	Yes
ENSG00000111961	SASH1 subnetwork	0.0364764	No		0.00050478	Yes
ENSG00000131149	KIAA0182 subnetwork	0.0366164	No		0.000154397	Yes
ENSG00000112062	MAPK14 subnetwork	0.0370414	No		1.29022e-06	Yes
ENSG00000156675	RAB11FIP1 subnetwork	0.0370991	No		0.00152663	Yes
ENSG00000141644	MBD1 subnetwork	0.0373579	No		0.000333587	Yes
ENSG00000109458	GAB1 subnetwork	0.0378101	No		0.000596302	Yes
ENSG00000122691	TWIST1 subnetwork	0.0378323	No		7.84125e-05	Yes
ENSG00000082781	ITGB5 subnetwork	0.0384019	No		1.15278e-08	Yes
ENSG00000133740	E2F5 subnetwork	0.0385575	No		0.00403556	Yes
ENSG00000179364	PACS2 subnetwork	0.0390421	No		0.000241753	Yes
ENSG00000179335	CLK3 subnetwork	0.0401333	No		0.00181295	Yes
ENSG00000087077	TRIP6 subnetwork	0.0412649	No		2.98617e-07	Yes
ENSG00000124074	C16orf48 subnetwork	0.041528	No		0.00103935	Yes
ENSG00000100888	CHD8 subnetwork	0.0419873	No		0.00012796	Yes
ENSG00000175029	CTBP2 subnetwork	0.0421794	No		6.91129e-07	Yes
ENSG00000111816	FRK subnetwork	0.0437964	No		0.00301702	Yes
ENSG00000204175	GPRIN2 subnetwork	0.04404	No		0.000706878	Yes
ENSG00000064835	POU1F1 subnetwork	0.0444489	No		0.00167807	Yes
ENSG00000185950	IRS2 subnetwork	0.0448371	No		0.000217731	Yes
ENSG00000176105	YES1 subnetwork	0.0448501	No		0.000764446	Yes
ENSG00000187079	TEAD1 subnetwork	0.0448889	No		0.000441106	Yes
ENSG00000143437	ARNT subnetwork	0.0449683	No		2.14081e-05	Yes
ENSG00000140009	ESR2 subnetwork	0.0450286	No		0.000224864	Yes
ENSG00000170776	AKAP13 subnetwork	0.0450501	No		0.00297211	Yes
ENSG00000072135	PTPN18 subnetwork	0.0452277	No		0.002722	Yes
ENSG00000159166	LAD1 subnetwork	0.0453663	No		0.00018604	Yes
ENSG00000159840	ZYX subnetwork	0.0458079	No		7.49719e-05	Yes
ENSG00000165476	REEP3 subnetwork	0.0474425	No		0.000282017	Yes
ENSG00000064999	ANKS1A subnetwork	0.0476247	No		0.00367659	Yes
ENSG00000185591	SP1 subnetwork	0.0496389	No		0.000628927	Yes
ENSG00000163346	PBXIP1 subnetwork	0.0503852	No		7.80927e-05	Yes
ENSG00000151276	MAGI1 subnetwork	0.0503961	No		0.000162607	Yes
ENSG00000125753	VASP subnetwork	0.0511248	No		0.000691255	Yes
ENSG00000163110	PDLIM5 subnetwork	0.0511368	No		0.000231269	Yes
ENSG00000051382	PIK3CB subnetwork	0.0517939	No		2.72536e-05	Yes
ENSG00000171720	HDAC3 subnetwork	0.0520463	No		1.22635e-05	Yes
ENSG00000163486	SRGAP2 subnetwork	0.0524891	No		0.00313402	Yes
ENSG00000117450	PRDX1 subnetwork	0.052599	No		0.00474839	Yes
ENSG00000188130	MAPK12 subnetwork	0.0530883	No		0.00230523	Yes
ENSG00000105221	AKT2 subnetwork	0.0534602	No		2.97057e-05	Yes
ENSG00000110237	ARHGEF17 subnetwork	0.0539393	No		0.00237147	Yes
ENSG00000130147	SH3BP4 subnetwork	0.054179	No		0.00017352	Yes
ENSG00000118689	FOXO3 subnetwork	0.0555596	No		0.000295597	Yes
ENSG00000197555	SIPA1L1 subnetwork	0.0557636	No		0.00065886	Yes
ENSG00000128951	DUT subnetwork	0.0562499	No		0.00300128	Yes
ENSG00000186654	PRR5 subnetwork	0.0563803	No		0.000169853	Yes
ENSG00000167193	CRK subnetwork	0.0569952	No		2.99293e-05	Yes
ENSG00000151748	SAV1 subnetwork	0.0579374	No		0.000356331	Yes
ENSG00000133056	PIK3C2B subnetwork	0.060155	No		1.12728e-05	Yes
ENSG00000050820	BCAR1 subnetwork	0.0604507	No		1.15889e-05	Yes
ENSG00000104325	DECR1 subnetwork	0.0607145	No		0.00227706	Yes
ENSG00000131759	RARA subnetwork	0.0612245	No		0.000626685	Yes
ENSG00000138439	FAM117B subnetwork	0.0617324	No		7.37664e-05	Yes
ENSG00000129691	ASH2L subnetwork	0.0619677	No		0.00181662	Yes
ENSG00000070159	PTPN3 subnetwork	0.0621462	No		0.000441929	Yes
ENSG00000100395	L3MBTL2 subnetwork	0.062516	No		2.25041e-05	Yes
ENSG00000168036	CTNNB1 subnetwork	0.0630216	No		0.000176445	Yes
ENSG00000179151	EDC3 subnetwork	0.0631257	No		0.000280362	Yes
ENSG00000139546	TARBP2 subnetwork	0.0631609	No		0.00264176	Yes
ENSG00000115963	RND3 subnetwork	0.0637003	No		0.00032151	Yes
ENSG00000130402	ACTN4 subnetwork	0.0638178	No		0.0045102	Yes
ENSG00000178950	GAK subnetwork	0.0639181	No		0.000330448	Yes
ENSG00000136485	DCAF7 subnetwork	0.0643074	No		0.000133182	Yes
ENSG00000164403	SHROOM1 subnetwork	0.0648664	No		0.000455705	Yes
ENSG00000198265	HELZ subnetwork	0.0655519	No		0.00241854	Yes
ENSG00000125124	BBS2 subnetwork	0.0659605	No		0.00365053	Yes
ENSG00000105401	CDC37 subnetwork	0.0661841	No		0.00280771	Yes
ENSG00000144852	NR1I2 subnetwork	0.0665272	No		0.00438919	Yes
ENSG00000108256	NUFIP2 subnetwork	0.0675697	No		4.38228e-05	Yes
ENSG00000116141	MARK1 subnetwork	0.0685497	No		0.00289667	Yes
ENSG00000141456	ENSG00000141456 subnetwork	0.0688345	No		0.00325269	Yes
ENSG00000143878	RHOB subnetwork	0.0695522	No		0.00394889	Yes
ENSG00000188313	PLSCR1 subnetwork	0.0704073	No		0.0016102	Yes
ENSG00000050405	LIMA1 subnetwork	0.0705879	No		0.00183037	Yes
ENSG00000089902	RCOR1 subnetwork	0.07089	No		0.000194858	Yes
ENSG00000130762	ARHGEF16 subnetwork	0.0710032	No		0.000550068	Yes
ENSG00000162419	GMEB1 subnetwork	0.0727739	No		0.00255612	Yes
ENSG00000013297	CLDN11 subnetwork	0.0735059	No		0.000153346	Yes
ENSG00000107643	MAPK8 subnetwork	0.0758177	No		4.6704e-05	Yes
ENSG00000156374	PCGF6 subnetwork	0.0761877	No		6.34392e-05	Yes
ENSG00000107485	GATA3 subnetwork	0.0803643	No		0.0036229	Yes
ENSG00000170027	YWHAG subnetwork	0.0838783	No		0.000268323	Yes
ENSG00000160741	CRTC2 subnetwork	0.0842686	No		1.36702e-06	Yes
ENSG00000185736	ADARB2 subnetwork	0.0861348	No		0.00100938	Yes
ENSG00000092203	TOX4 subnetwork	0.0875767	No		1.55784e-06	Yes
ENSG00000151577	DRD3 subnetwork	0.087679	No		0.0026984	Yes
ENSG00000007968	E2F2 subnetwork	0.0897367	No		0.0019691	Yes
ENSG00000131941	RHPN2 subnetwork	0.0908801	No		0.000951954	Yes
ENSG00000140319	SRP14 subnetwork	0.0919092	No		0.00119937	Yes
ENSG00000171608	PIK3CD subnetwork	0.0930113	No		4.03441e-05	Yes
ENSG00000100485	SOS2 subnetwork	0.0932977	No		0.001886	Yes
ENSG00000132153	DHX30 subnetwork	0.0937554	No		0.0002135	Yes
ENSG00000198400	NTRK1 subnetwork	0.0938191	No		0.00170371	Yes
ENSG00000072110	ACTN1 subnetwork	0.094299	No		8.55565e-05	Yes
ENSG00000177425	PAWR subnetwork	0.0946546	No		0.00139898	Yes
ENSG00000118194	TNNT2 subnetwork	0.0960882	No		0.00141517	Yes
ENSG00000109062	SLC9A3R1 subnetwork	0.0989959	No		0.00163503	Yes
ENSG00000163558	PRKCI subnetwork	0.0996059	No		0.00279196	Yes
ENSG00000132470	ITGB4 subnetwork	0.102372	No		0.000761463	Yes
ENSG00000107404	DVL1 subnetwork	0.102861	No		0.00211878	Yes
ENSG00000197321	SVIL subnetwork	0.104173	No		0.00132564	Yes
ENSG00000103126	AXIN1 subnetwork	0.104487	No		0.000486287	Yes
ENSG00000033800	PIAS1 subnetwork	0.104571	No		0.00146924	Yes
ENSG00000169047	IRS1 subnetwork	0.104731	No		0.000124827	Yes
ENSG00000180530	NRIP1 subnetwork	0.104957	No		0.000146208	Yes
ENSG00000196455	PIK3R4 subnetwork	0.105515	No		9.40527e-05	Yes
ENSG00000020577	SAMD4A subnetwork	0.106118	No		0.000899032	Yes
ENSG00000179295	PTPN11 subnetwork	0.108686	No		0.000364947	Yes
ENSG00000107566	ERLIN1 subnetwork	0.109082	No		4.97197e-05	Yes
ENSG00000115274	INO80B subnetwork	0.113328	No		7.60581e-05	Yes
ENSG00000097007	ABL1 subnetwork	0.114375	No		0.00195395	Yes
ENSG00000101452	DHX35 subnetwork	0.115053	No		0.000856321	Yes
ENSG00000177485	ZBTB33 subnetwork	0.115986	No		1.49469e-06	Yes
ENSG00000206088	ENSG00000206088 subnetwork	0.11747	No		0.00176311	Yes
ENSG00000169220	RGS14 subnetwork	0.1179	No		0.000183972	Yes
ENSG00000119729	RHOQ subnetwork	0.120627	No		0.00114922	Yes
ENSG00000085274	MYNN subnetwork	0.122311	No		0.00457398	Yes
ENSG00000100302	RASD2 subnetwork	0.124054	No		0.00176067	Yes
ENSG00000164078	MST1R subnetwork	0.124386	No		0.00107125	Yes
ENSG00000135409	AMHR2 subnetwork	0.12665	No		0.00101876	Yes
ENSG00000138771	SHROOM3 subnetwork	0.126746	No		1.4923e-05	Yes
ENSG00000095637	SORBS1 subnetwork	0.127059	No		0.0023478	Yes
ENSG00000109320	NFKB1 subnetwork	0.127726	No		0.00154131	Yes
ENSG00000171219	CDC42BPG subnetwork	0.128451	No		4.86664e-05	Yes
ENSG00000020633	RUNX3 subnetwork	0.131485	No		0.0034027	Yes
ENSG00000061938	TNK2 subnetwork	0.133765	No		0.00229067	Yes
ENSG00000214021	TTLL3 subnetwork	0.133792	No		0.00376215	Yes
ENSG00000168615	ADAM9 subnetwork	0.135833	No		8.33463e-06	Yes
ENSG00000141027	NCOR1 subnetwork	0.136608	No		0.00128546	Yes
ENSG00000188191	PRKAR1B subnetwork	0.137541	No		0.000716881	Yes
ENSG00000169756	LIMS1 subnetwork	0.138688	No		7.01843e-05	Yes
ENSG00000107263	RAPGEF1 subnetwork	0.139085	No		2.25624e-07	Yes
ENSG00000130382	MLLT1 subnetwork	0.142062	No		7.92262e-05	Yes
ENSG00000115221	ITGB6 subnetwork	0.14212	No		8.21388e-05	Yes
ENSG00000078747	ITCH subnetwork	0.150197	No		0.00456224	Yes
ENSG00000082701	GSK3B subnetwork	0.1514	No		0.000254137	Yes
ENSG00000078328	RBFOX1 subnetwork	0.153517	No		0.00280213	Yes
ENSG00000171843	MLLT3 subnetwork	0.154635	No		0.0010673	Yes
ENSG00000135930	EIF4E2 subnetwork	0.155536	No		0.000755736	Yes
ENSG00000122565	CBX3 subnetwork	0.158069	No		0.00158257	Yes
ENSG00000056661	PCGF2 subnetwork	0.159161	No		5.25147e-06	Yes
ENSG00000174197	MGA subnetwork	0.16015	No		3.01184e-05	Yes
ENSG00000015153	YAF2 subnetwork	0.16079	No		2.61647e-06	Yes
ENSG00000111424	VDR subnetwork	0.161671	No		0.00183619	Yes
ENSG00000148180	GSN subnetwork	0.163966	No		9.56089e-05	Yes
ENSG00000118680	MYL12B subnetwork	0.165316	No		0.0010189	Yes
ENSG00000105851	PIK3CG subnetwork	0.165689	No		0.000115411	Yes
ENSG00000100320	RBFOX2 subnetwork	0.166329	No		0.00280253	Yes
ENSG00000204227	RING1 subnetwork	0.166457	No		9.82996e-07	Yes
ENSG00000206215	ENSG00000206215 subnetwork	0.166457	No		9.82996e-07	Yes
ENSG00000206287	RING1 subnetwork	0.166457	No		9.82996e-07	Yes
ENSG00000134371	CDC73 subnetwork	0.167757	No		4.46941e-05	Yes
ENSG00000134308	YWHAQ subnetwork	0.168946	No		3.3023e-09	Yes
ENSG00000171105	INSR subnetwork	0.169987	No		9.55794e-06	Yes
ENSG00000178409	BEND3 subnetwork	0.170369	No		3.11756e-05	Yes
ENSG00000131023	LATS1 subnetwork	0.170427	No		0.00406453	Yes
ENSG00000130669	PAK4 subnetwork	0.171015	No		6.2163e-05	Yes
ENSG00000104312	RIPK2 subnetwork	0.171244	No		0.00389296	Yes
ENSG00000100842	EFS subnetwork	0.171319	No		4.65359e-05	Yes
ENSG00000076928	ARHGEF1 subnetwork	0.174358	No		0.00103351	Yes
ENSG00000004487	KDM1A subnetwork	0.174731	No		2.15885e-07	Yes
ENSG00000132694	ARHGEF11 subnetwork	0.180502	No		0.000638785	Yes
ENSG00000141506	PIK3R5 subnetwork	0.180562	No		6.43463e-05	Yes
ENSG00000176658	MYO1D subnetwork	0.181565	No		0.000208694	Yes
ENSG00000067560	RHOA subnetwork	0.183401	No		0.000116663	Yes
ENSG00000157077	ZFYVE9 subnetwork	0.186033	No		9.35802e-05	Yes
ENSG00000163932	PRKCD subnetwork	0.187933	No		0.00255989	Yes
ENSG00000186716	BCR subnetwork	0.189052	No		0.000173378	Yes
ENSG00000010803	SCMH1 subnetwork	0.193898	No		2.03804e-06	Yes
ENSG00000120910	PPP3CC subnetwork	0.199112	No		0.00318739	Yes
ENSG00000141582	CBX4 subnetwork	0.199668	No		7.38228e-06	Yes
ENSG00000197943	PLCG2 subnetwork	0.205299	No		0.000171856	Yes
ENSG00000073584	SMARCE1 subnetwork	0.206262	No		0.000799662	Yes
ENSG00000136156	ITM2B subnetwork	0.20652	No		0.000942838	Yes
ENSG00000071564	TCF3 subnetwork	0.206665	No		0.00121135	Yes
ENSG00000105229	PIAS4 subnetwork	0.207711	No		0.000313782	Yes
ENSG00000072195	SPEG subnetwork	0.208319	No		0.00142588	Yes
ENSG00000176476	CCDC101 subnetwork	0.210686	No		0.000855095	Yes
ENSG00000148143	ZNF462 subnetwork	0.218392	No		0.00221207	Yes
ENSG00000080815	PSEN1 subnetwork	0.22288	No		0.00137956	Yes
ENSG00000204388	HSPA1B subnetwork	0.223646	No		0.00116155	Yes
ENSG00000204389	HSPA1A subnetwork	0.223646	No		0.00116155	Yes
ENSG00000212860	ENSG00000212860 subnetwork	0.223646	No		0.00116155	Yes
ENSG00000212866	HSPA1B subnetwork	0.223646	No		0.00116155	Yes
ENSG00000215292	ENSG00000215292 subnetwork	0.223646	No		0.00116155	Yes
ENSG00000139514	SLC7A1 subnetwork	0.22748	No		0.000427365	Yes
ENSG00000117020	AKT3 subnetwork	0.228542	No		9.89965e-05	Yes
ENSG00000071655	MBD3 subnetwork	0.229499	No		0.000604757	Yes
ENSG00000183337	BCOR subnetwork	0.230534	No		1.96671e-06	Yes
ENSG00000148498	PARD3 subnetwork	0.233682	No		0.000903948	Yes
ENSG00000152137	HSPB8 subnetwork	0.233842	No		0.00120561	Yes
ENSG00000139269	INHBE subnetwork	0.23652	No		0.00323426	Yes
ENSG00000148175	STOM subnetwork	0.237317	No		0.00121593	Yes
ENSG00000169016	E2F6 subnetwork	0.237931	No		2.87671e-06	Yes
ENSG00000127947	PTPN12 subnetwork	0.241127	No		4.46913e-05	Yes
ENSG00000180628	PCGF5 subnetwork	0.244878	No		0.000100489	Yes
ENSG00000184083	FAM120C subnetwork	0.247841	No		0.00177379	Yes
ENSG00000162521	RBBP4 subnetwork	0.249212	No		0.00233396	Yes
ENSG00000115289	PCGF1 subnetwork	0.251026	No		7.68386e-06	Yes
ENSG00000141480	ARRB2 subnetwork	0.252539	No		0.00107314	Yes
ENSG00000131910	NR0B2 subnetwork	0.252631	No		0.00179244	Yes
ENSG00000130803	ZNF317 subnetwork	0.253866	No		0.00327691	Yes
ENSG00000015171	ZMYND11 subnetwork	0.256056	No		0.000151704	Yes
ENSG00000089094	KDM2B subnetwork	0.257307	No		7.70774e-05	Yes
ENSG00000082175	PGR subnetwork	0.257665	No		1.55968e-05	Yes
ENSG00000120063	GNA13 subnetwork	0.25885	No		0.000451052	Yes
ENSG00000105723	GSK3A subnetwork	0.259291	No		0.000103142	Yes
ENSG00000140682	TGFB1I1 subnetwork	0.262058	No		4.21259e-07	Yes
ENSG00000158691	ZSCAN12 subnetwork	0.263157	No		0.00237089	Yes
ENSG00000119401	TRIM32 subnetwork	0.263699	No		5.71022e-06	Yes
ENSG00000163956	LRPAP1 subnetwork	0.263857	No		0.000759765	Yes
ENSG00000063438	AHRR subnetwork	0.264317	No		0.00260009	Yes
ENSG00000151322	NPAS3 subnetwork	0.264326	No		5.03089e-05	Yes
ENSG00000204209	DAXX subnetwork	0.266529	No		0.000313248	Yes
ENSG00000206206	DAXX subnetwork	0.266529	No		0.000313248	Yes
ENSG00000206279	DAXX subnetwork	0.266529	No		0.000313248	Yes
ENSG00000173894	CBX2 subnetwork	0.26954	No		6.54817e-07	Yes
ENSG00000100030	MAPK1 subnetwork	0.272817	No		8.26593e-07	Yes
ENSG00000143537	ADAM15 subnetwork	0.275116	No		0.000774367	Yes
ENSG00000166333	ILK subnetwork	0.277766	No		0.00052378	Yes
ENSG00000185619	PCGF3 subnetwork	0.27978	No		3.98961e-05	Yes
ENSG00000055208	TAB2 subnetwork	0.280198	No		0.00477995	Yes
ENSG00000163283	ALPP subnetwork	0.280648	No		1.89025e-05	Yes
ENSG00000121741	ZMYM2 subnetwork	0.281256	No		0.000194806	Yes
ENSG00000154415	PPP1R3A subnetwork	0.282462	No		0.00445263	Yes
ENSG00000136383	ALPK3 subnetwork	0.282701	No		0.0017262	Yes
ENSG00000103994	ZFP106 subnetwork	0.283197	No		5.82213e-06	Yes
ENSG00000183741	CBX6 subnetwork	0.293596	No		2.11705e-06	Yes
ENSG00000116285	ERRFI1 subnetwork	0.294917	No		0.000427487	Yes
ENSG00000131652	THOC6 subnetwork	0.296668	No		6.22151e-05	Yes
ENSG00000105376	ICAM5 subnetwork	0.299072	No		0.00405211	Yes
ENSG00000172757	CFL1 subnetwork	0.301638	No		0.000867498	Yes
ENSG00000126767	ELK1 subnetwork	0.302437	No		0.000490937	Yes
ENSG00000198802	ENSG00000198802 subnetwork	0.311466	No		0.00342183	Yes
ENSG00000006638	TBXA2R subnetwork	0.314302	No		8.30833e-05	Yes
ENSG00000102882	MAPK3 subnetwork	0.315038	No		0.000507083	Yes
ENSG00000143373	ZNF687 subnetwork	0.317322	No		0.00409212	Yes
ENSG00000105216	ENSG00000105216 subnetwork	0.317688	No		0.00186302	Yes
ENSG00000111859	NEDD9 subnetwork	0.318946	No		0.00212727	Yes
ENSG00000175866	BAIAP2 subnetwork	0.329809	No		0.00248343	Yes
ENSG00000013561	RNF14 subnetwork	0.337655	No		0.000131276	Yes
ENSG00000153071	DAB2 subnetwork	0.337887	No		0.00468335	Yes
ENSG00000143507	DUSP10 subnetwork	0.34058	No		0.000255498	Yes
ENSG00000147689	FAM83A subnetwork	0.340887	No		0.00223527	Yes
ENSG00000120899	PTK2B subnetwork	0.346119	No		0.000698422	Yes
ENSG00000140992	PDPK1 subnetwork	0.346476	No		1.58973e-05	Yes
ENSG00000105647	PIK3R2 subnetwork	0.346925	No		3.42187e-05	Yes
ENSG00000121481	RNF2 subnetwork	0.349293	No		5.15021e-06	Yes
ENSG00000184979	USP18 subnetwork	0.351412	No		0.00044743	Yes
ENSG00000163602	RYBP subnetwork	0.352463	No		0.000233485	Yes
ENSG00000115234	SNX17 subnetwork	0.353191	No		0.00399846	Yes
ENSG00000081019	RSBN1 subnetwork	0.354807	No		0.00407518	Yes
ENSG00000134686	PHC2 subnetwork	0.355921	No		0.000104555	Yes
ENSG00000145907	G3BP1 subnetwork	0.356281	No		0.00167697	Yes
ENSG00000178177	LCORL subnetwork	0.358255	No		0.000304141	Yes
ENSG00000141956	PRDM15 subnetwork	0.359311	No		0.000367956	Yes
ENSG00000186867	QRFPR subnetwork	0.362801	No		0.000295141	Yes
ENSG00000150459	SAP18 subnetwork	0.369207	No		0.00436729	Yes
ENSG00000182901	RGS7 subnetwork	0.371995	No		0.00114967	Yes
ENSG00000113712	CSNK1A1 subnetwork	0.375608	No		6.3259e-05	Yes
ENSG00000060237	WNK1 subnetwork	0.376027	No		0.00235041	Yes
ENSG00000141570	CBX8 subnetwork	0.380958	No		3.60339e-07	Yes
ENSG00000124356	STAMBP subnetwork	0.382013	No		0.000331415	Yes
ENSG00000101336	HCK subnetwork	0.382527	No		0.002425	Yes
ENSG00000117461	PIK3R3 subnetwork	0.383567	No		0.000102136	Yes
ENSG00000132139	GAS2L2 subnetwork	0.385002	No		0.000119618	Yes
ENSG00000147162	OGT subnetwork	0.385763	No		2.31646e-06	Yes
ENSG00000092439	TRPM7 subnetwork	0.387008	No		1.39091e-05	Yes
ENSG00000159388	BTG2 subnetwork	0.387548	No		0.000502293	Yes
ENSG00000169967	MAP3K2 subnetwork	0.388702	No		0.000496969	Yes
ENSG00000134909	ARHGAP32 subnetwork	0.389388	No		0.00041386	Yes
ENSG00000132825	PPP1R3D subnetwork	0.391462	No		0.000313674	Yes
ENSG00000056972	TRAF3IP2 subnetwork	0.392637	No		0.000694571	Yes
ENSG00000141736	ERBB2 subnetwork	0.39594	No		0.000150025	Yes
ENSG00000175745	NR2F1 subnetwork	0.39829	No		0.00131399	Yes
ENSG00000068024	HDAC4 subnetwork	0.399425	No		0.00388803	Yes
ENSG00000150867	PIP4K2A subnetwork	0.399802	No		0.00276129	Yes
ENSG00000123358	NR4A1 subnetwork	0.400013	No		0.00240987	Yes
ENSG00000128881	TTBK2 subnetwork	0.400305	No		0.000189677	Yes
ENSG00000168283	BMI1 subnetwork	0.403473	No		8.87211e-07	Yes
ENSG00000173889	PHC3 subnetwork	0.406982	No		0.00113978	Yes
ENSG00000111348	ARHGDIB subnetwork	0.408493	No		0.00351964	Yes
ENSG00000105855	ITGB8 subnetwork	0.408951	No		0.000298184	Yes
ENSG00000168310	IRF2 subnetwork	0.428291	No		0.00219153	Yes
ENSG00000118058	MLL subnetwork	0.431241	No		0.00412114	Yes
ENSG00000116030	SUMO1 subnetwork	0.432701	No		0.000995996	Yes
ENSG00000139083	ETV6 subnetwork	0.434566	No		0.00043954	Yes
ENSG00000171942	OR10H2 subnetwork	0.43604	No		0.00034247	Yes
ENSG00000103343	ZNF174 subnetwork	0.436699	No		0.00475693	Yes
ENSG00000107968	MAP3K8 subnetwork	0.439254	No		0.000396571	Yes
ENSG00000136011	STAB2 subnetwork	0.439576	No		0.000577755	Yes
ENSG00000134365	CFHR4 subnetwork	0.444371	No		0.000403398	Yes
ENSG00000148200	NR6A1 subnetwork	0.450202	No		0.000887954	Yes
ENSG00000105173	CCNE1 subnetwork	0.453079	No		0.00255321	Yes
ENSG00000172534	HCFC1 subnetwork	0.454048	No		0.00204726	Yes
ENSG00000167978	SRRM2 subnetwork	0.456293	No		0.00388804	Yes
ENSG00000179899	ENSG00000179899 subnetwork	0.461074	No		9.6392e-06	Yes
ENSG00000197530	MIB2 subnetwork	0.470044	No		0.000580638	Yes
ENSG00000099942	CRKL subnetwork	0.470802	No		2.76491e-05	Yes
ENSG00000143514	TP53BP2 subnetwork	0.471525	No		4.70932e-05	Yes
ENSG00000173567	GPR113 subnetwork	0.472857	No		0.000282916	Yes
ENSG00000138378	STAT4 subnetwork	0.473179	No		0.000175199	Yes
ENSG00000183791	TCEB3C subnetwork	0.473699	No		0.000474896	Yes
ENSG00000206156	ENSG00000206156 subnetwork	0.477098	No		0.0011902	Yes
ENSG00000132357	CARD6 subnetwork	0.478016	No		8.29821e-05	Yes
ENSG00000198793	MTOR subnetwork	0.478759	No		0.00122931	Yes
ENSG00000123091	RNF11 subnetwork	0.483849	No		0.00185795	Yes
ENSG00000065243	PKN2 subnetwork	0.48987	No		3.56863e-05	Yes
ENSG00000077809	GTF2I subnetwork	0.498912	No		3.33142e-06	Yes
ENSG00000111707	SUDS3 subnetwork	0.505857	No		0.000555481	Yes
ENSG00000146535	GNA12 subnetwork	0.515124	No		9.60898e-05	Yes
ENSG00000107223	EDF1 subnetwork	0.521598	No		0.00133597	Yes
ENSG00000213341	CHUK subnetwork	0.522006	No		0.000357406	Yes
ENSG00000168546	GFRA2 subnetwork	0.522064	No		0.000153146	Yes
ENSG00000145675	PIK3R1 subnetwork	0.526522	No		0.00287958	Yes
ENSG00000151693	ASAP2 subnetwork	0.526931	No		5.09348e-07	Yes
ENSG00000158828	PINK1 subnetwork	0.531829	No		0.000385805	Yes
ENSG00000182979	MTA1 subnetwork	0.536066	No		1.29415e-05	Yes
ENSG00000185324	CDK10 subnetwork	0.539211	No		5.85988e-06	Yes
ENSG00000096968	JAK2 subnetwork	0.539815	No		0.00121665	Yes
ENSG00000111752	PHC1 subnetwork	0.549085	No		6.25716e-05	Yes
ENSG00000132155	RAF1 subnetwork	0.549756	No		0.000269271	Yes
ENSG00000074047	GLI2 subnetwork	0.555328	No		0.000524383	Yes
ENSG00000110721	CHKA subnetwork	0.559032	No		0.00162326	Yes
ENSG00000196353	CPNE4 subnetwork	0.561219	No		0.000384766	Yes
ENSG00000183283	DAZAP2 subnetwork	0.561848	No		2.22719e-05	Yes
ENSG00000172602	RND1 subnetwork	0.562936	No		0.00473552	Yes
ENSG00000115325	DOK1 subnetwork	0.569548	No		0.000498999	Yes
ENSG00000100105	PATZ1 subnetwork	0.574171	No		4.1637e-05	Yes
ENSG00000115306	SPTBN1 subnetwork	0.575625	No		9.27636e-05	Yes
ENSG00000125952	MAX subnetwork	0.592297	No		1.01903e-05	Yes
ENSG00000141696	LEPREL4 subnetwork	0.599081	No		0.00105457	Yes
ENSG00000119487	MAPKAP1 subnetwork	0.601518	No		0.00139031	Yes
ENSG00000198373	WWP2 subnetwork	0.606307	No		1.49951e-05	Yes
ENSG00000148942	SLC5A12 subnetwork	0.608426	No		0.000375345	Yes
ENSG00000065361	ERBB3 subnetwork	0.609528	No		0.000615732	Yes
ENSG00000105997	HOXA3 subnetwork	0.609981	No		0.000687246	Yes
ENSG00000108984	MAP2K6 subnetwork	0.61499	No		0.000399748	Yes
ENSG00000149480	MTA2 subnetwork	0.617139	No		0.000466056	Yes
ENSG00000102054	RBBP7 subnetwork	0.624824	No		4.45124e-05	Yes
ENSG00000183963	SMTN subnetwork	0.628184	No		0.00182927	Yes
ENSG00000140750	ARHGAP17 subnetwork	0.630229	No		0.000388198	Yes
ENSG00000179603	GRM8 subnetwork	0.630899	No		0.00476735	Yes
ENSG00000011405	PIK3C2A subnetwork	0.638617	No		0.00067612	Yes
ENSG00000150760	DOCK1 subnetwork	0.644643	No		0.00107355	Yes
ENSG00000159346	ADIPOR1 subnetwork	0.654473	No		0.000531531	Yes
ENSG00000124208	TMEM189-UBE2V1 subnetwork	0.658524	No		0.00136583	Yes
ENSG00000198053	SIRPA subnetwork	0.660231	No		0.00390091	Yes
ENSG00000127884	ECHS1 subnetwork	0.663954	No		0.00354558	Yes
ENSG00000145819	ARHGAP26 subnetwork	0.664161	No		0.000262688	Yes
ENSG00000057608	GDI2 subnetwork	0.66815	No		0.000734807	Yes
ENSG00000153317	ASAP1 subnetwork	0.668582	No		4.29573e-07	Yes
ENSG00000111642	CHD4 subnetwork	0.669156	No		0.000900119	Yes
ENSG00000085733	CTTN subnetwork	0.669897	No		0.00296561	Yes
ENSG00000077420	APBB1IP subnetwork	0.680565	No		0.000829864	Yes
ENSG00000015285	WAS subnetwork	0.681158	No		0.00170601	Yes
ENSG00000197343	ZNF655 subnetwork	0.684068	No		0.000111231	Yes
ENSG00000152291	TGOLN2 subnetwork	0.688751	No		1.57198e-06	Yes
ENSG00000115415	STAT1 subnetwork	0.68887	No		0.000504524	Yes
ENSG00000204569	PPP1R10 subnetwork	0.697525	No		0.00211349	Yes
ENSG00000206407	ENSG00000206407 subnetwork	0.697525	No		0.00211349	Yes
ENSG00000206489	PPP1R10 subnetwork	0.697525	No		0.00211349	Yes
ENSG00000065559	MAP2K4 subnetwork	0.698916	No		0.00308415	Yes
ENSG00000120265	PCMT1 subnetwork	0.701425	No		0.000344705	Yes
ENSG00000137843	PAK6 subnetwork	0.704936	No		0.00062012	Yes
ENSG00000123329	ARHGAP9 subnetwork	0.707239	No		0.00282809	Yes
ENSG00000136653	RASSF5 subnetwork	0.715311	No		0.00157153	Yes
ENSG00000184216	IRAK1 subnetwork	0.721874	No		0.000444064	Yes
ENSG00000135341	MAP3K7 subnetwork	0.745326	No		0.000102005	Yes
ENSG00000123338	NCKAP1L subnetwork	0.756574	No		0.00382297	Yes
ENSG00000146587	RBAK subnetwork	0.759729	No		0.00224626	Yes
ENSG00000099246	RAB18 subnetwork	0.767695	No		0.00202183	Yes
ENSG00000168264	IRF2BP2 subnetwork	0.767754	No		0.00299354	Yes
ENSG00000166888	STAT6 subnetwork	0.768164	No		0.0003952	Yes
ENSG00000131196	NFATC1 subnetwork	0.779942	No		0.00449369	Yes
ENSG00000107807	TLX1 subnetwork	0.796089	No		0.00106324	Yes
ENSG00000164438	TLX3 subnetwork	0.804604	No		9.96035e-05	Yes
ENSG00000071054	MAP4K4 subnetwork	0.80851	No		0.000497245	Yes
ENSG00000214078	CPNE1 subnetwork	0.81045	No		6.07298e-05	Yes
ENSG00000184922	FMNL1 subnetwork	0.811974	No		0.00450904	Yes
ENSG00000198563	DDX39B subnetwork	0.817788	No		0.00155446	Yes
ENSG00000215412	ENSG00000215412 subnetwork	0.817788	No		0.00155446	Yes
ENSG00000215425	DDX39B subnetwork	0.817788	No		0.00155446	Yes
ENSG00000010671	BTK subnetwork	0.823591	No		0.000426605	Yes
ENSG00000133124	IRS4 subnetwork	0.844723	No		0.00257005	Yes
ENSG00000127191	TRAF2 subnetwork	0.84603	No		0.00046679	Yes
ENSG00000197822	OCLN subnetwork	0.849837	No		0.0035535	Yes
ENSG00000165782	TMEM55B subnetwork	0.852003	No		7.23872e-05	Yes
ENSG00000162734	PEA15 subnetwork	0.85921	No		0.00307661	Yes
ENSG00000002330	BAD subnetwork	0.867104	No		0.00346626	Yes
ENSG00000157404	KIT subnetwork	0.867327	No		0.000227638	Yes
ENSG00000100906	NFKBIA subnetwork	0.878078	No		8.02766e-06	Yes
ENSG00000082074	FYB subnetwork	0.923947	No		0.0034193	Yes
ENSG00000182578	CSF1R subnetwork	0.939382	No		0.00265307	Yes
ENSG00000137713	PPP2R1B subnetwork	0.946265	No		0.00263699	Yes
ENSG00000017797	RALBP1 subnetwork	0.948378	No		0.00127516	Yes
ENSG00000181031	RPH3AL subnetwork	0.957362	No		0.00471484	Yes
ENSG00000167641	PPP1R14A subnetwork	0.958881	No		0.0045218	Yes
ENSG00000127914	AKAP9 subnetwork	0.961966	No		0.0035091	Yes
ENSG00000135365	PHF21A subnetwork	0.970366	No		0.000537678	Yes
ENSG00000198910	L1CAM subnetwork	0.972926	No		0.0047813	Yes
ENSG00000082512	TRAF5 subnetwork	0.976734	No		0.000170178	Yes
ENSG00000011485	PPP5C subnetwork	0.984315	No		0.00114975	Yes
ENSG00000185989	RASA3 subnetwork	0.98808	No		0.00189541	Yes
ENSG00000111199	TRPV4 subnetwork	0.990063	No		0.000326707	Yes
ENSG00000083896	YTHDC1 subnetwork	0.997243	No		5.06722e-05	Yes

## Sheet: S Table 8
Supplementary Table 8. Using mediation variants and pleiotropy variants separately in MR analysis with outcomes: CAD, MI and STROKE
			IMRP				MRmix
Outcome	IV type	# of IVsa	Causal effectb	95% CI	P	# of PVsc	Causal effectb	95% CI	P
Exposure: SBPd
CAD	mediation	758	1.85	(1.73;1.97)	3.73×10-78	103	1.8	(1.56;2.09)	2.68×10-15
MI	mediation	756	1.77	(1.65;1.90)	1.60×10-57	89	1.72	(1.42;2.08)	3.57×10-8
stroke	mediation	758	1.66	(1.55;1.76)	1.37×10-57	77	1.7	(1.29;2.24)	1.80×10-4
CAD	pleiotropy	730	1.48	(1.34;1.63)	2.64×10-14	150	1.49	(1.06;2.10)	0.022
MI	Pleiotropy	729	1.32	(1.18;1.47)	7.11×10-7	125	1.43	(1.09;1.88)	9.41×10-3
stroke	pleiotropy	730	1.42	(1.30;1.55)	1.98×10-14	92	1.16	(0.81;1.67)	0.417
Exposure: DBPe
CAD	mediation	774	1.85	(1.74;1.97)	1.16×10-80	105	1.86	(1.60;2.16)	5.38×10-16
MI	mediation	771	1.85	(1.73;1.98)	3.22×10-68	91	1.86	(1.51;2.29)	5.65×10-9
STROKE	mediation	773	1.67	(1.57;1.77)	2.77×10-60	79	1.88	(1.51;2.33)	8.84×10-9
CAD	pleiotropy	730	1.37	(1.24;1.50)	4.63×10-11	157	1.34	(1.02;1.75)	0.037
MI	Pleiotropy	729	1.13	(1.02;1.25)	0.017	134	1.31	(1.05;1.63)	0.527
STROKE	pleiotropy	730	1.28	(1.18;1.39)	5.07×10-9	90	1.13	(0.80;1.59)	0.491
a# of IVs: number of genetic instrumental variables
b causal effect represents odd ratio
c# of PVs: number of pleiotropic variants detected by IMRP.
d Exposure: SBP: The exposure was SBP for mediation variants as instrumental variables, and the exposure was BPpleio1 for pleiotropy variants as instrumental variables. (see the definition of BPpleio1 in Online Methods)
e Exposure: DBP: The exposure was DBP for mediation variants as instrumental variables, and the exposure was BPpleio2 for pleiotropy variants as instrumental variables. (see the definition of BPpleio2 in Online Methods)
CAD: coronary artery disease
MI: myocardial infraction
